# Supplementary material
Source: PubMed Central journal article supplement (PMC2669318)

# Parallel Synthesis of a Multi-Substituted Benzo[*b*]furan Library

Chul-Hee Cho,<sup>†</sup> Benjamin Neuenswander,<sup>‡</sup> Gerald H. Lushington,<sup>‡</sup> and Richard C. Larock<sup>†,\*</sup>

*Department of Chemistry, Iowa State University, Ames, Iowa 50011, and the University of  
Kansas NIH Center of Excellence in Chemical Methodologies and Library Development,  
Lawrence, Kansas 66047*

## Supporting Information

### Contents

|                                                                      |         |
|----------------------------------------------------------------------|---------|
| 1. General considerations                                            | S2      |
| 2. Experimental details and characterization                         | S2-S25  |
| 3. Copies of selected <sup>1</sup> H and <sup>13</sup> C NMR spectra | S26-S88 |

---

\* Corresponding Author: Phone: (515) 294-4660. E-mail: [larock@iastate.edu](mailto:larock@iastate.edu)

<sup>†</sup> Iowa State University

<sup>‡</sup> University of Kansas

The  $^1\text{H}$  (400 or 300 MHz) and  $^{13}\text{C}$  NMR (100 or 75 MHz) spectra were recorded in  $\text{CDCl}_3$  as the solvent using tetramethylsilane (TMS) as an internal standard, unless otherwise stated. Chemical shifts are reported in  $\delta$  units (ppm) by assigning the TMS resonance in the  $^1\text{H}$  NMR spectrum as 0.00 ppm and the  $\text{CDCl}_3$  resonance in the  $^{13}\text{C}$  NMR spectrum as 77.23 ppm. All coupling constants,  $J$ , are reported in Hertz (Hz). Analytical thin layer chromatography (TLC) was performed using commercially prepared 60-mesh silica gel plates, and visualization was effected with short wavelength UV light (254 nm). All melting points are uncorrected. HPLC analysis was carried out using an Xterra MS C-18 column (5  $\mu\text{M}$ , 4.6  $\times$  150 mm) with gradient elution (10%  $\text{CH}_3\text{CN}$  to 100%  $\text{CH}_3\text{CN}$ ) on a Waters Mass Directed Fractionation instrument using a Waters 2767 sample manager and Waters 2525 HPLC pump and a 2487 dual  $\lambda$  absorbance detector, and Water/Micromass ZQ (quadruple) detector. Purification was carried out using an Xterra MS C-18 column (5  $\mu\text{M}$ , 10  $\times$  150 mm), and gradient elution (40%  $\text{CH}_3\text{CN}$  to 100%  $\text{CH}_3\text{CN}$ ) with a UV fraction trigger. High resolution mass spectra (HRMS) were obtained using a Waters/Micromass LCT Premier TOF instrument.

Commercially available reagents were used without further purification unless otherwise stated. The organic solvents (*e.g.*  $\text{Et}_2\text{O}$ ,  $\text{EtOAc}$ ,  $\text{EtOH}$ ,  $\text{CH}_3\text{CN}$ ,  $\text{DMF}$ , hexanes, toluene, etc.) were used as anhydrous solvents. THF and  $\text{CH}_2\text{Cl}_2$  were distilled from sodium/benzophenone or  $\text{CaH}_2$  respectively under an atmosphere of argon prior to use. The palladium catalysts were donated by Johnson Matthey Inc. and Kawaken Fine Chemicals Co. Ltd. The boronic acids were donated by Frontier Scientific and Synthonix Co. Ltd.

### General procedure for the preparation of bromoalkynes **7**{5-8}

To a solution of 4-bromo-2-iodoanisole [**5**{3}], 10.0 mmol], 3 mol %  $\text{PdCl}_2(\text{PPh}_3)_2$  and 3 mol %  $\text{CuI}$  in  $\text{Et}_3\text{N}$  (20 mL), 10.5 mmol of terminal alkyne **6** was added. The reaction mixture was stirred vigorous between 0  $^\circ\text{C}$  and room temperature for *ca.* 1-3 h under an Ar atmosphere. The resulting mixture was diluted with  $\text{EtOAc}$  (2  $\times$  200 mL). The separated organic layer was washed with water and brine, dried over  $\text{MgSO}_4$ , and concentrated *in vacuo*. The crude product was purified by column chromatography on silica gel using ethyl acetate/hexanes as the eluent to afford the corresponding products **7**{5-8}.

### Bromoalkyne **7**{5}

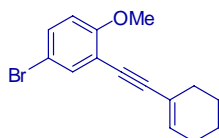

The product was obtained as a yellow oil (84% yield):  $^1\text{H}$  NMR (300 MHz,  $\text{CDCl}_3$ )  $\delta$  1.54-1.69 (m, 4H), 2.07-2.16 (m, 2H), 2.18-2.25 (m, 2H), 3.79 (s, 3H), 6.19-6.23 (m, 1H), 6.67 (d,  $J = 8.9$  Hz, 1H), 7.28 (dd,  $J = 2.5, 8.9$  Hz, 1H), 7.47 (d,  $J = 2.5$  Hz, 1H);  $^{13}\text{C}$  NMR (75 MHz,  $\text{CDCl}_3$ )  $\delta$  21.5, 22.3, 25.8, 29.1, 56.0,

81.6, 96.6, 112.1, 112.1, 115.0, 120.6, 131.7, 135.4, 135.7, 158.8; HRMS calcd for C<sub>15</sub>H<sub>15</sub>BrO [M<sup>+</sup>], 290.0306, found 290.0309.

#### Bromoalkyne 7{6}

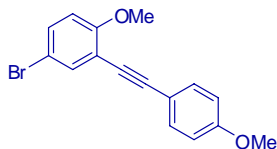

The product was obtained as yellow oil that solidified upon standing to a yellow solid (90% yield): mp 68-70 °C (uncorrected); <sup>1</sup>H NMR (400 MHz, CDCl<sub>3</sub>) δ 3.75 (s, 3H), 3.80 (s, 3H), 6.68 (d, *J* = 8.9 Hz, 1H), 6.83 (d, *J* = 8.8 Hz, 2H), 7.31 (dd, *J* = 2.5, 8.8 Hz, 1H), 7.46 (d, *J* = 8.8 Hz, 2H), 7.57 (d, *J* = 2.5 Hz, 1H); <sup>13</sup>C NMR (100 MHz, CDCl<sub>3</sub>) δ 55.3, 56.0, 83.1, 94.8, 112.3, 114.0 (×2), 114.2, 114.9, 115.1, 132.0, 133.2 (×2), 135.5, 158.9, 159.8; HRMS calcd for C<sub>16</sub>H<sub>13</sub>BrO<sub>2</sub> [M<sup>+</sup>], 316.0099, found 316.0102.

#### Bromoalkyne 7{7}

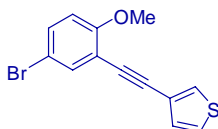

The product was obtained as a dark yellow oil (94% yield); <sup>1</sup>H NMR (400 MHz, CDCl<sub>3</sub>) δ 3.86 (s, 3H), 6.74 (d, *J* = 8.8 Hz, 1H), 7.20 (dd, *J* = 1.2, 5.0 Hz, 1H), 7.26 (d, *J* = 8.8 Hz, 1H), 7.28 (d, *J* = 8.0 Hz, 1H), 7.36 (dd, *J* = 2.5, 8.8 Hz, 1H), 7.54 (dd, *J* = 1.2, 3.0 Hz, 1H), 7.58 (d, *J* = 2.5 Hz, 1H); <sup>13</sup>C NMR (100 MHz, CDCl<sub>3</sub>) δ 56.2, 84.0, 89.9, 112.4, 112.4, 114.6, 122.2, 125.5, 129.2, 130.1, 132.5, 135.8, 159.1; HRMS calcd for C<sub>13</sub>H<sub>9</sub>BrOS [M<sup>+</sup>], 291.9557, found 291.9551.

#### Bromoalkyne 7{8}

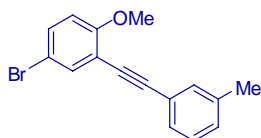

The product was obtained as a yellow oil (93% yield): <sup>1</sup>H NMR (400 MHz, CDCl<sub>3</sub>) δ 2.34 (s, 3H), 3.87 (s, 3H), 6.75 (d, *J* = 8.9 Hz, 1H), 7.14 (d, *J* = 7.6 Hz, 1H), 7.23 (t, *J* = 7.4 Hz, 1H), 7.36-7.39 (m, 3H), 7.59 (d, *J* = 2.5 Hz, 1H); <sup>13</sup>C NMR (100 MHz, CDCl<sub>3</sub>) δ 21.4, 56.3, 84.1, 95.0, 112.41, 112.44, 114.8, 123.0, 128.4, 128.9, 129.5, 132.42, 132.44, 135.9, 138.1, 159.2; HRMS calcd for C<sub>16</sub>H<sub>13</sub>BrO [M<sup>+</sup>], 300.0150, found 300.0156.

### General procedure for the preparation of alkynes 8{1-13} by Suzuki-Miyaura coupling

#### Method A (using arylboronic acids 10)

To a solution of bromoalkyne 7{5-8} (2.0 mmol) and 5 mol % Pd(PPh<sub>3</sub>)<sub>4</sub> in toluene (10 mL) was added K<sub>2</sub>CO<sub>3</sub> (6.0 mmol) under an Ar atmosphere. To the resulting mixture was added arylboronic acid 10 (3.0

mmol) dissolved in ethanol (2 mL). The reaction mixture was heated at 80 °C for 8 h with vigorous stirring. Upon cooling to room temperature, the reaction mixture was extracted with EtOAc (2 × 40 mL). The combined extracts were dried over MgSO<sub>4</sub>, concentrated, and purified by flash column chromatography using EtOAc/hexane as the eluent to afford the corresponding product.

**Method B** (using heteroarylboronic acids **10**)

To a solution of bromoalkyne **7**{5-8} (2.0 mmol), 5 mol % Pd(dba)<sub>2</sub> and 8 mol % PPh<sub>3</sub> in toluene (10 mL) was added KOH (6.0 mmol) under an Ar atmosphere. To the resulting mixture was added heteroarylboronic acid **10** (3.0 mmol) dissolved in ethanol (2 mL). The reaction mixture was heated at 80 °C for 8 h with vigorous stirring. Upon cooling to room temperature, the reaction mixture was extracted with EtOAc.

**Alkyne 8**{1}

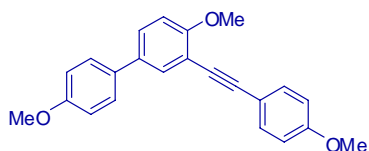

The product was obtained as a pale yellow solid (69% yield): mp 135-137 °C (uncorrected); <sup>1</sup>H NMR (400 MHz, CDCl<sub>3</sub>) δ 3.78 (s, 3H), 3.79 (s, 3H), 3.89 (s, 3H), 6.86 (d, *J* = 8.7 Hz, 2H), 6.89 (d, *J* = 8.7 Hz, 1H), 6.93 (d, *J* = 8.7 Hz, 2H), 7.43 (d, *J* = 8.7 Hz, 1H), 7.47 (d, *J* = 8.7 Hz, 2H), 7.51 (d, *J* = 8.7 Hz, 2H), 7.69 (d, *J* = 2.2 Hz, 1H); <sup>13</sup>C NMR (100 MHz, CDCl<sub>3</sub>) δ 55.38, 55.43, 56.1, 84.6, 93.6, 111.1, 113.1, 114.0 (×2), 114.3 (×2), 115.7, 127.7, 127.8 (×2), 131.6, 132.7, 133.3 (×2), 133.4, 158.9, 159.0, 159.6; HRMS calcd for C<sub>23</sub>H<sub>20</sub>O<sub>3</sub> [M<sup>+</sup>], 344.1412, found 344.1412.

**Alkyne 8**{2}

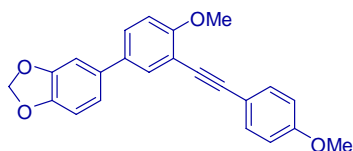

The product was obtained as a white solid (63% yield): mp 132-135 °C (uncorrected); <sup>1</sup>H NMR (400 MHz, CDCl<sub>3</sub>) δ 3.76 (s, 3H), 3.87 (s, 3H), 5.93 (s, 2H), 6.81-6.88 (m, 2H), 6.85 (d, *J* = 8.7 Hz, 2H), 6.97-7.01 (m, 2H), 7.35-7.39 (m, 1H), 7.51 (d, *J* = 8.7 Hz, 2H), 7.64 (d, *J* = 2.3 Hz, 1H); <sup>13</sup>C NMR (100 MHz, CDCl<sub>3</sub>) δ 55.3, 56.0, 84.5, 93.7, 101.2, 107.3, 108.6, 111.0, 113.1 (×2), 114.0, 115.6, 120.2, 127.8, 131.7, 133.2 (×2), 133.4, 134.5, 146.9, 148.2, 159.0, 159.6; HRMS calcd for C<sub>23</sub>H<sub>18</sub>O<sub>4</sub> [M<sup>+</sup>], 358.1205, found 358.1207.

**Alkyne 8**{3}

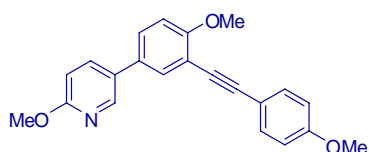

The product was obtained as a yellow oil (57% yield):  $^1\text{H}$  NMR (400 MHz,  $\text{CDCl}_3$ )  $\delta$  3.82 (s, 3H), 3.94 (s, 3H), 3.97 (s, 3H), 6.80 (d,  $J = 8.6$  Hz, 1H), 6.88 (d,  $J = 8.9$  Hz, 2H), 6.96 (d,  $J = 8.6$  Hz, 1H), 7.42 (dd,  $J = 2.4, 8.6$  Hz, 1H), 7.52 (d,  $J = 8.9$  Hz, 2H), 7.64 (d,  $J = 2.3$  Hz, 1H), 7.75 (dd,  $J = 2.5, 8.6$  Hz, 1H), 8.35 (d,  $J = 2.1$  Hz, 1H);  $^{13}\text{C}$  NMR (100 MHz,  $\text{CDCl}_3$ )  $\delta$  53.7, 55.5, 56.2, 84.3, 94.0, 110.9, 111.3, 113.5, 114.1 ( $\times 2$ ), 115.6, 127.7, 129.2, 130.5, 131.7, 133.3 ( $\times 2$ ), 137.3, 144.7, 159.4, 159.8, 163.5; HRMS calcd for  $\text{C}_{22}\text{H}_{19}\text{NO}_3$  [ $\text{M}^+$ ], 345.1365, found 345.1359.

#### Alkyne 8{4}

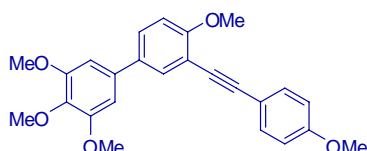

The product was obtained as a yellow oil (63% yield):  $^1\text{H}$  NMR (400 MHz,  $\text{CDCl}_3$ )  $\delta$  3.80 (s, 3H), 3.88 (s, 3H), 3.92 (s, 6H), 3.93 (s, 3H), 6.74 (s, 2H), 6.87 (d,  $J = 8.7$  Hz, 2H), 6.94 (d,  $J = 8.6$  Hz, 1H), 7.46 (dd,  $J = 2.2, 8.6$  Hz, 1H), 7.52 (d,  $J = 8.7$  Hz, 2H), 7.69 (d,  $J = 2.1$  Hz, 1H);  $^{13}\text{C}$  NMR (100 MHz,  $\text{CDCl}_3$ )  $\delta$  55.4, 56.1, 56.3 ( $\times 2$ ), 61.1, 84.4, 93.8, 104.0 ( $\times 2$ ), 111.0, 113.1, 114.0 ( $\times 2$ ), 115.5, 128.1, 131.9, 133.2 ( $\times 2$ ), 133.8, 136.2, 137.4, 153.5 ( $\times 2$ ), 159.3, 159.7; HRMS calcd for  $\text{C}_{25}\text{H}_{24}\text{O}_5$  [ $\text{M}^+$ ], 404.1624, found 404.1628.

#### Alkyne 8{5}

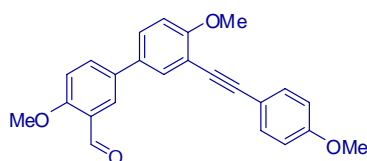

The product was obtained as a yellow oil (72% yield):  $^1\text{H}$  NMR (400 MHz,  $\text{CDCl}_3$ )  $\delta$  3.82 (s, 3H), 3.93 (s, 3H), 3.94 (s, 3H), 6.88 (d,  $J = 8.8$  Hz, 2H), 6.93 (d,  $J = 8.7$  Hz, 1H), 7.03 (d,  $J = 8.7$  Hz, 1H), 7.47 (dd,  $J = 2.4, 8.6$  Hz, 1H), 7.52 (d,  $J = 8.8$  Hz, 2H), 7.66-7.76 (m, 2H), 8.03 (d,  $J = 2.1$  Hz, 1H), 10.50 (s, 1H);  $^{13}\text{C}$  NMR (100 MHz,  $\text{CDCl}_3$ )  $\delta$  55.5, 56.0, 56.2, 84.3, 93.9, 111.2, 112.3, 113.4, 114.1 ( $\times 2$ ), 116.2, 125.0, 126.3, 127.7, 131.6, 132.0, 132.8, 133.3 ( $\times 2$ ), 134.0, 159.3, 159.7, 161.1, 189.9; HRMS calcd for  $\text{C}_{24}\text{H}_{20}\text{O}_4$  [ $\text{M}^+$ ], 372.1362, found 372.1353.

#### Alkyne 8{6}

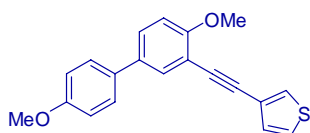

The product was obtained as yellow oil that solidified upon standing to a yellow solid (78% yield): mp 106-108  $^{\circ}\text{C}$  (uncorrected);  $^1\text{H}$  NMR (400 MHz,  $\text{CDCl}_3$ )  $\delta$  3.82 (s, 3H), 3.91 (s, 3H), 6.92 (d,  $J = 8.7$  Hz, 1H), 6.94 (d,  $J = 8.8$  Hz, 2H), 7.21-7.29 (m, 2H), 7.46 (d,  $J = 8.7$  Hz, 1H), 7.48 (d,  $J = 8.8$  Hz, 2H), 7.55 (dd,  $J = 1.2, 2.9$  Hz, 1H), 7.68 (d,  $J = 2.4$  Hz, 1H);  $^{13}\text{C}$  NMR (100 MHz,  $\text{CDCl}_3$ )  $\delta$  55.5, 56.2, 85.4, 88.7,

111.1, 112.7, 114.4 (×2), 122.6, 125.4, 127.8 (×2), 128.1, 128.8, 130.2, 131.8, 132.7, 133.5, 159.0; HRMS calcd for C<sub>20</sub>H<sub>16</sub>O<sub>2</sub>S [M<sup>+</sup>], 320.0871, found 320.0862.

**Alkyne 8{7}**

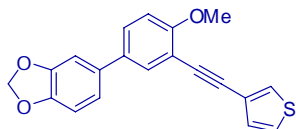

The product was obtained as yellow oil that solidified upon standing to a yellow solid (81% yield): mp 100-101 °C (uncorrected); <sup>1</sup>H NMR (300 MHz, CDCl<sub>3</sub>) δ 3.91 (s, 3H), 5.96 (s, 2H), 6.84 (d, *J* = 7.9 Hz, 1H), 6.90 (d, *J* = 8.7 Hz, 1H), 6.98-7.03 (m, 2H), 7.21-7.29 (m, 2H), 7.39-7.43 (m, 1H), 7.53-7.57 (m, 1H), 7.63-7.65 (m, 1H); <sup>13</sup>C NMR (75 MHz, CDCl<sub>3</sub>) δ 56.2, 85.3, 88.8, 101.3, 107.4, 108.7, 111.2, 112.8, 120.3, 122.6, 125.4, 128.2, 128.8, 130.2, 132.0, 133.6, 134.5, 147.0, 148.3, 159.2; calcd for C<sub>20</sub>H<sub>14</sub>O<sub>3</sub>S [M<sup>+</sup>], 334.0664, found 334.0668.

**Alkyne 8{8}**

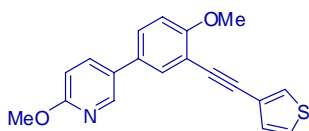

The product was obtained as a dark yellow oil (62% yield): <sup>1</sup>H NMR (400 MHz, CDCl<sub>3</sub>) δ 3.94 (s, 3H), 3.97 (s, 3H), 6.80 (d, *J* = 8.6 Hz, 1H), 6.97 (d, *J* = 8.6 Hz, 1H), 7.21-7.31 (m, 2H), 7.45 (d, *J* = 8.6 Hz, 1H), 7.57 (s, 1H), 7.65 (s, 1H), 7.75 (d, *J* = 8.6 Hz, 1H), 8.35 (s, 1H); <sup>13</sup>C NMR (100 MHz, CDCl<sub>3</sub>) δ 53.8, 56.2, 85.1, 89.0, 111.0, 111.4, 113.1, 122.5, 125.4, 128.0, 129.0, 129.2, 130.2, 130.6, 131.8, 137.3, 144.7, 159.5, 163.6; calcd for C<sub>19</sub>H<sub>15</sub>NO<sub>2</sub>S [M<sup>+</sup>], 321.0823, found 321.0817.

**Alkyne 8{9}**

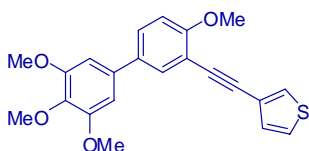

The product was obtained as yellow oil that solidified upon standing to a yellow solid (83% yield): mp 156.5-158 °C (uncorrected); <sup>1</sup>H NMR (400 MHz, CDCl<sub>3</sub>) δ 3.88 (s, 3H), 3.92 (s, 6H), 3.94 (s, 3H), 6.74 (s, 2H), 6.95 (d, *J* = 8.6 Hz, 1H), 7.21-7.31 (m, 2H), 7.48 (dd, *J* = 2.3, 8.6 Hz, 1H), 7.56 (d, *J* = 2.9 Hz, 1H), 7.68 (d, *J* = 2.3 Hz, 1H); <sup>13</sup>C NMR (100 MHz, CDCl<sub>3</sub>) δ 56.2, 56.4 (×2), 61.1, 85.2, 88.8, 104.1 (×2), 111.1, 112.8, 122.5, 125.4, 128.4, 128.9, 130.1, 132.1, 133.9, 136.1, 137.5, 153.6 (×2), 159.5; HRMS calcd for C<sub>22</sub>H<sub>20</sub>O<sub>4</sub>S [M<sup>+</sup>], 380.1082, found 380.1089.

**Alkyne 8{10}**

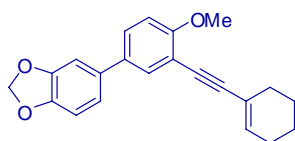

The product was obtained as a pale yellow solid (71% yield): mp 107-108 °C (uncorrected);  $^1\text{H}$  NMR (400 MHz,  $\text{CDCl}_3$ )  $\delta$  1.56-1.70 (m, 4H), 2.10-2.18 (m, 2H), 2.22-2.30 (m, 2H), 3.87 (s, 3H), 5.95 (s, 2H), 6.25 (br s, 1H), 6.84 (t,  $J = 9.1$  Hz, 2H), 6.97-7.02 (m, 2H), 7.36 (dd,  $J = 2.4, 8.6$  Hz, 1H), 7.55 (d,  $J = 2.4$  Hz, 1H);  $^{13}\text{C}$  NMR (100 MHz,  $\text{CDCl}_3$ )  $\delta$  21.6, 22.4, 25.9, 29.4, 56.0, 83.0, 95.5, 101.2, 107.3, 108.5, 110.9, 113.2, 120.1, 120.9, 127.5, 131.6, 133.3, 134.5, 135.2, 146.8, 148.1, 158.9; HRMS calcd for  $\text{C}_{22}\text{H}_{20}\text{O}_3$  [ $\text{M}^+$ ], 332.1412, found 332.1409.

#### Alkyne 8{11}

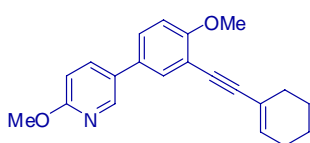

The product was obtained as a pale yellow oil (68% yield):  $^1\text{H}$  NMR (400 MHz,  $\text{CDCl}_3$ )  $\delta$  1.61-1.67 (m, 4H), 2.14 (br s, 2H), 2.27 (br s, 2H), 3.90 (s, 3H), 3.96 (s, 3H), 6.26-6.27 (m, 1H), 6.78 (d,  $J = 8.6$  Hz, 1H), 6.92 (d,  $J = 8.6$  Hz, 1H), 7.38 (d,  $J = 8.6$  Hz, 1H), 7.56 (s, 1H), 7.73 (d,  $J = 8.6$  Hz, 1H), 8.32 (s, 1H);  $^{13}\text{C}$  NMR (100 MHz,  $\text{CDCl}_3$ )  $\delta$  21.7, 22.5, 26.0, 29.4, 53.7, 56.1, 82.8, 95.9, 110.8, 111.2, 113.7, 120.9, 127.5, 129.3, 130.4, 135.6, 137.2, 144.6, 159.3, 163.5; calcd for  $\text{C}_{21}\text{H}_{21}\text{NO}_2$  [ $\text{M}^+$ ], 319.1572, found 319.1576.

#### Alkyne 8{12}

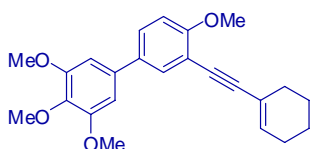

The product was obtained as a pale yellow oil (68% yield):  $^1\text{H}$  NMR (400 MHz,  $\text{CDCl}_3$ )  $\delta$  1.59-1.71 (m, 4H), 2.14 (br s, 2H), 2.28 (br s, 2H), 3.88 (s, 3H), 3.89 (s, 3H), 3.91 (s, 6H), 6.26 (br s, 1H), 6.72 (s, 2H), 6.90 (d,  $J = 8.6$  Hz, 1H), 7.43 (d,  $J = 8.6$  Hz, 1H), 7.59 (s, 1H);  $^{13}\text{C}$  NMR (100 MHz,  $\text{CDCl}_3$ )  $\delta$  21.6, 22.4, 25.9, 29.3, 56.0, 56.2 ( $\times 2$ ), 61.0, 82.9, 95.6, 103.9 ( $\times 2$ ), 110.9, 113.2, 120.8, 127.8, 131.8, 133.7, 135.4, 136.1, 137.3, 153.4 ( $\times 2$ ), 159.2; calcd for  $\text{C}_{24}\text{H}_{26}\text{O}_4$  [ $\text{M}^+$ ], 378.1831, found 378.1823.

#### Alkyne 8{13}

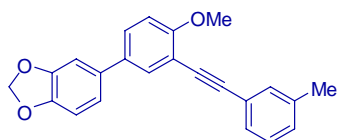

The product was obtained as a yellow oil (67% yield):  $^1\text{H}$  NMR (400 MHz,  $\text{CDCl}_3$ )  $\delta$  2.33 (s, 3H), 3.88 (s, 3H), 5.94 (s, 2H), 6.83 (d,  $J = 8.0$  Hz, 1H), 6.87 (d,  $J = 8.6$  Hz, 1H), 6.98-7.01 (m, 2H), 7.10-7.12 (m, 1H),

7.20-7.23 (m, 1H), 7.37-7.40 (m, 3H), 7.65 (d,  $J = 2.2$  Hz, 1H);  $^{13}\text{C}$  NMR (100 MHz,  $\text{CDCl}_3$ )  $\delta$  21.4, 56.1, 85.5, 93.9, 101.2, 107.4, 108.7, 111.1, 112.9, 120.2, 123.4, 128.1, 128.3, 128.9, 129.2, 131.9, 132.4, 133.5, 134.5, 138.0, 146.9, 148.2, 159.2; HRMS calcd for  $\text{C}_{23}\text{H}_{18}\text{O}_3$  [ $\text{M}^+$ ], 342.1256, found 342.1256.

#### General procedure for the preparation of alkyne **8**{14} by carbonylative Suzuki coupling.

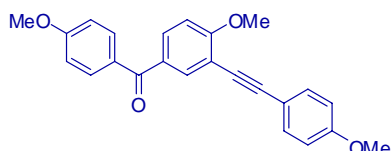

The bromoalkyne **7**{6} (2.0 mmol), 4-methoxyphenylboronic acid **10**{1} (2.2 mmol),  $\text{K}_2\text{CO}_3$  (6.0 mmol), NaI (6.0 mmol) and 5 mol %  $\text{PdCl}_2(\text{dppf})$  in toluene (10 mL) were placed in a vial with a magnetic stir bar under an Ar atmosphere. After sealing the vial, the atmosphere was changed to carbon monoxide and the reaction mixture was kept at 80 °C for 24 h with vigorous stirring. Upon cooling to room temperature, the reaction mixture was extracted with EtOAc (2 × 40 mL). The usual work up gave a crude oil, which was purified by chromatography (EtOAc/hexane) to give **8**{14} in a 38% yield as a pale yellow oil:  $^1\text{H}$  NMR (400 MHz,  $\text{CDCl}_3$ )  $\delta$  3.81 (s, 3H), 3.87 (s, 3H), 3.97 (s, 3H), 6.86 (d,  $J = 8.8$  Hz, 2H), 6.96 (d,  $J = 8.7$  Hz, 1H), 6.97 (d,  $J = 8.8$  Hz, 2H), 7.49 (d,  $J = 8.8$  Hz, 2H), 7.76-7.82 (m, 3H), 7.94 (d,  $J = 2.2$  Hz, 1H);  $^{13}\text{C}$  NMR (100 MHz,  $\text{CDCl}_3$ )  $\delta$  55.4, 55.6, 56.3, 83.6, 94.3, 110.2, 112.8, 113.7 (×2), 114.1 (×2), 115.3, 130.5, 130.7, 131.9, 132.4 (×2), 133.3 (×2), 135.6, 159.8, 162.7, 163.1, 193.9; HRMS calcd for  $\text{C}_{24}\text{H}_{20}\text{O}_4$  [ $\text{M}^+$ ] 372.1362, found 372.1354.

#### General procedure for the preparation of alkynes **8**{15-20} by amination.

To the bromoalkyne **7**{5-8} (2.0 mmol), 5 mol %  $\text{Pd}_2(\text{dba})_3$  and  $\text{NaO}^t\text{Bu}$  (1.4 equiv), DavePhos (0.1 equiv) was added with a magnetic stir bar under an Ar atmosphere. To the reagent mixture was added amine **11** (1.5 equiv) dissolved in toluene (12 mL) at room temperature. The reaction mixture was heated to 60 °C for 12 h. Upon cooling to room temperature, the reaction mixture was extracted with EtOAc (2 × 40 mL). The combined extracts were dried over  $\text{MgSO}_4$ , concentrated, and purified by column chromatography on silica gel using ethyl acetate/hexanes as the eluent to afford the corresponding product **8**{15-20}.

#### Alkyne **8**{15}

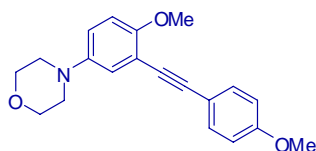

The product was obtained as a dark-brown oil (78% yield):  $^1\text{H}$  NMR (400 MHz,  $\text{CDCl}_3$ )  $\delta$  3.05 (t,  $J = 4.8$  Hz, 4H), 3.79 (s, 3H), 3.85 (s, 3H), 3.83 (t,  $J = 4.8$  Hz, 4H), 6.80-6.88 (m, 2H), 6.86 (d,  $J = 8.9$  Hz, 2H),



7.07 (d,  $J = 2.8$  Hz, 1H), 7.49 (d,  $J = 8.9$  Hz, 2H);  $^{13}\text{C}$  NMR (100 MHz,  $\text{CDCl}_3$ )  $\delta$  50.6 ( $\times 2$ ), 55.3, 56.4, 67.1 ( $\times 2$ ), 84.7, 93.3, 111.9, 113.2, 114.0 ( $\times 2$ ), 115.7, 118.0, 121.5, 133.2 ( $\times 2$ ), 145.3, 154.4, 159.6; HRMS calcd for  $\text{C}_{20}\text{H}_{21}\text{NO}_3$  [ $\text{M}^+$ ] 323.1521, found 323.1519.

**Alkyne 8{16}**

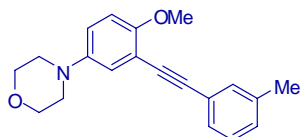

The product was obtained as a dark brown oil (73% yield):  $^1\text{H}$  NMR (400 MHz,  $\text{CDCl}_3$ )  $\delta$  2.33 (s, 3H), 3.06 (t,  $J = 4.8$  Hz, 4H), 3.84 (t,  $J = 4.8$  Hz, 4H), 3.86 (s, 3H), 6.81-6.89 (m, 2H), 7.08 (d,  $J = 2.8$  Hz, 1H), 7.12 (d,  $J = 7.6$  Hz, 1H), 7.22 (t,  $J = 7.6$  Hz, 1H), 7.36 (d,  $J = 7.6$  Hz, 1H), 7.39 (s, 1H);  $^{13}\text{C}$  NMR (100 MHz,  $\text{CDCl}_3$ )  $\delta$  21.4, 50.7 ( $\times 2$ ), 56.5, 67.1 ( $\times 2$ ), 85.8, 93.5, 112.0, 113.0, 118.3, 121.7, 123.4, 128.3, 128.8, 129.2, 132.4, 138.0, 145.4, 154.5; HRMS calcd for  $\text{C}_{20}\text{H}_{21}\text{NO}_2$  [ $\text{M}^+$ ] 307.1572, found 307.1563.

**Alkyne 8{17}**

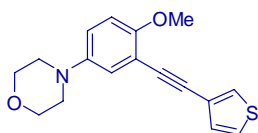

The product was obtained as yellow oil that solidified upon standing to a yellow solid (71% yield): mp 118-119  $^\circ\text{C}$  (uncorrected);  $^1\text{H}$  NMR (400 MHz,  $\text{CDCl}_3$ )  $\delta$  3.06 (t,  $J = 4.8$  Hz, 4H), 3.85 (s, 3H), 3.85 (t,  $J = 4.8$  Hz, 4H), 6.82-6.81 (m, 2H), 7.08 (d,  $J = 2.8$  Hz, 1H), 7.21-7.30 (m, 2H), 7.53-5.54 (m, 1H);  $^{13}\text{C}$  NMR (100 MHz,  $\text{CDCl}_3$ )  $\delta$  50.7 ( $\times 2$ ), 56.4, 67.1 ( $\times 2$ ), 85.6, 88.4, 111.9, 112.8, 118.4, 121.7, 122.6, 125.3, 128.8, 130.1, 145.3, 145.4, 154.5; HRMS calcd for  $\text{C}_{17}\text{H}_{17}\text{NO}_2\text{S}$  [ $\text{M}^+$ ] 299.0980, found 299.0972.

**Alkyne 8{19}**

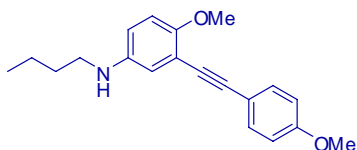

The product was obtained as a yellow oil (87% yield):  $^1\text{H}$  NMR (400 MHz,  $\text{CDCl}_3$ )  $\delta$  0.95 (t,  $J = 7.3$  Hz, 3H), 1.36-1.47 (m, 2H), 1.53-1.62 (m, 2H), 3.06 (t,  $J = 7.1$  Hz, 2H), 3.33 (br s, 1H), 3.81 (s, 3H), 3.84 (s, 3H), 6.57 (dd,  $J = 2.9, 8.8$  Hz, 1H), 6.76 (d,  $J = 11.7$  Hz, 1H), 6.77 (s, 1H), 6.85 (d,  $J = 8.9$  Hz, 2H), 7.49 (d,  $J = 8.9$  Hz, 2H);  $^{13}\text{C}$  NMR (100 MHz,  $\text{CDCl}_3$ )  $\delta$  14.1, 20.5, 31.9, 44.8, 55.4, 56.8, 85.0, 93.0, 112.8, 113.4, 114.0 ( $\times 2$ ), 114.6, 115.9, 117.6, 133.3 ( $\times 2$ ), 142.6, 152.6, 159.6; HRMS calcd for  $\text{C}_{20}\text{H}_{23}\text{NO}_2$  [ $\text{M}^+$ ] 309.1729, found 309.1717.

**Alkyne 8{20}**

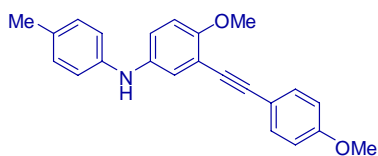

The product was obtained as a yellow oil (93% yield):  $^1\text{H}$  NMR (400 MHz,  $\text{CDCl}_3$ )  $\delta$  2.28 (s, 3H), 3.80 (s, 3H), 3.87 (s, 3H), 5.44 (br s, 1H), 6.80 (d,  $J = 8.8$  Hz, 1H), 6.84-6.89 (m, 4H), 6.98 (dd,  $J = 2.8, 8.8$  Hz, 1H), 7.04 (d,  $J = 8.1$  Hz, 2H), 7.20 (d,  $J = 2.8$  Hz, 1H), 7.47 (d,  $J = 8.9$  Hz, 2H);  $^{13}\text{C}$  NMR (100 MHz,  $\text{CDCl}_3$ )  $\delta$  20.8, 55.4, 56.5, 84.5, 93.6, 112.1, 113.6, 114.0 ( $\times 2$ ), 115.7, 117.3 ( $\times 2$ ), 120.8, 124.4, 129.9, 130.0 ( $\times 2$ ), 133.3 ( $\times 2$ ), 136.8, 141.9, 155.1, 159.7; HRMS calcd for  $\text{C}_{23}\text{H}_{21}\text{NO}_2$  [ $\text{M}^+$ ] 343.1572, found 343.1562.

### General procedure for the iodocyclization of compounds **9**{1-24}

To a solution of 1.6 mmol of the alkyne **7** and/or **8** and 15 mL of  $\text{CH}_2\text{Cl}_2$  was added gradually 1.5 equiv of ICl dissolved in 10 mL of  $\text{CH}_2\text{Cl}_2$ . The reaction mixture was allowed to stir at room temperature for 1-2 h. The reaction was monitored by TLC to establish completion. The excess ICl was removed by washing with satd aq  $\text{Na}_2\text{S}_2\text{O}_3$ . The mixture was then extracted by EtOAc ( $2 \times 30$  mL). The combined organic layers were dried over anhydrous  $\text{MgSO}_4$  and concentrated under a vacuum to yield the crude product, which was purified by flash chromatography on silica gel using EtOAc/hexanes as the eluent.

### 3-Iodobenzofuran **9**{3}

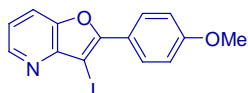

The product was obtained as yellow oil that solidified upon standing to a dark brown solid (76% yield): mp 108  $^\circ\text{C}$  (uncorrected);  $^1\text{H}$  NMR (400 MHz,  $\text{CDCl}_3$ )  $\delta$  3.87 (s, 3H), 7.02 (d,  $J = 9.0$  Hz, 2H), 7.24 (dd,  $J = 8.2, 4.8$  Hz, 1H), 7.69 (dd,  $J = 8.2, 1.2$  Hz, 1H), 8.18 (d,  $J = 9.0$  Hz, 2H), 8.59 (dd,  $J = 4.8, 1.2$  Hz, 1H);  $^{13}\text{C}$  NMR (100 MHz,  $\text{CDCl}_3$ )  $\delta$  55.6, 62.4, 114.2 ( $\times 2$ ), 118.0, 120.0, 122.1, 129.4 ( $\times 2$ ), 146.6, 146.9, 149.8, 156.6, 161.0; HRMS calcd for  $\text{C}_{14}\text{H}_{10}\text{INO}_2$  [ $\text{M}^+$ ] 350.9756, found 350.9744.

### 3-Iodobenzofuran **9**{4}

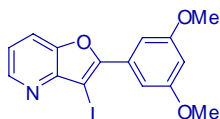

The product was obtained as dark yellow semi-solid (58% yield):  $^1\text{H}$  NMR (400 MHz,  $\text{CDCl}_3$ )  $\delta$  3.90 (s, 6H), 6.59 (t,  $J = 2.2$  Hz, 1H), 7.32 (dd,  $J = 8.3, 4.8$  Hz, 1H), 7.42 (d,  $J = 2.2$  Hz, 2H), 7.77 (dd,  $J = 1.2, 8.3$  Hz, 1H), 8.64 (dd,  $J = 1.2, 4.8$  Hz, 1H);  $^{13}\text{C}$  NMR (100 MHz,  $\text{CDCl}_3$ )  $\delta$  55.8, 64.8, 102.9, 105.9 ( $\times 2$ ), 118.5, 120.6, 131.2, 146.9, 147.1, 149.6, 156.2, 161.0 ( $\times 2$ ); HRMS calcd for  $\text{C}_{15}\text{H}_{12}\text{INO}_3$  [ $\text{M}^+$ ] 380.9862, found 380.9861.

### 3-Iodobenzofuran 9{5}

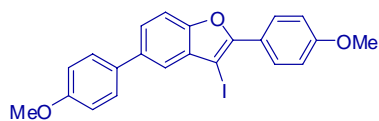

The product was obtained as a pale yellow solid (93% yield): mp 165-168 °C (uncorrected); <sup>1</sup>H NMR (400 MHz, CDCl<sub>3</sub>) δ 3.86 (s, 3H), 3.87 (s, 3H), 7.00 (d, *J* = 8.9 Hz, 2H), 7.02 (d, *J* = 8.5 Hz, 2H), 7.47-7.53 (m, 3H), 7.58 (d, *J* = 8.7 Hz, 2H), 8.13 (d, *J* = 8.9 Hz, 2H); <sup>13</sup>C NMR (100 MHz, CDCl<sub>3</sub>) δ 55.6, 55.6, 59.8, 111.3, 114.1 (×2), 114.4 (×2), 119.6, 122.8, 124.7, 126.6, 128.6 (×2), 129.2 (×2), 133.2, 134.0, 137.0, 153.2, 159.2, 160.5; HRMS calcd for C<sub>22</sub>H<sub>17</sub>IO<sub>3</sub> [M<sup>+</sup>] 456.0222, found 456.0231.

### 3-Iodobenzofuran 9{6}

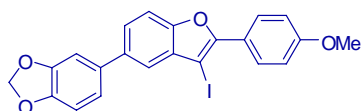

The product was obtained as an ivory solid (89% yield): mp 148-150 °C (uncorrected); <sup>1</sup>H NMR (400 MHz, CDCl<sub>3</sub>) δ 3.86 (s, 3H), 6.00 (s, 2H), 6.90 (d, *J* = 8.0 Hz, 1H), 7.01 (d, *J* = 8.8 Hz, 2H), 7.07-7.12 (m, 1H), 7.10 (d, *J* = 8.0 Hz, 1H), 7.45 (s, 2H), 7.49 (s, 1H), 8.12 (d, *J* = 8.7 Hz, 2H); <sup>13</sup>C NMR (100 MHz, CDCl<sub>3</sub>) δ 55.6, 59.8, 101.4, 108.2, 108.8, 111.3, 114.1 (×2), 114.3, 119.8, 121.1, 124.8, 128.0 (×2), 133.2, 135.8, 137.1, 147.1, 148.3, 153.3, 154.0, 160.5; HRMS calcd for C<sub>22</sub>H<sub>15</sub>IO<sub>4</sub> [M<sup>+</sup>] 470.0015, found 470.0023.

### 3-Iodobenzofuran 9{7}

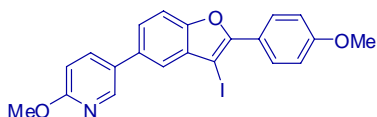

The product was obtained as a pale yellow solid (87% yield): mp 167-169 °C (uncorrected); <sup>1</sup>H NMR (400 MHz, CDCl<sub>3</sub>) δ 3.86 (s, 3H), 3.99 (s, 3H), 6.82 (d, *J* = 8.6 Hz, 1H), 7.00 (d, *J* = 8.9 Hz, 2H), 7.42-7.49 (m, 3H), 7.82 (dd, *J* = 2.6, 8.6 Hz, 1H), 8.11 (d, *J* = 8.9 Hz, 2H), 8.43 (d, *J* = 2.3 Hz, 1H); <sup>13</sup>C NMR (100 MHz, CDCl<sub>3</sub>) δ 53.8, 55.6, 59.6, 110.9, 111.6, 114.1 (×2), 119.7, 122.6, 124.4, 129.2 (×2), 130.4, 133.4, 133.9, 137.9, 145.3, 153.4, 154.1, 160.6, 163.6; HRMS calcd for C<sub>21</sub>H<sub>16</sub>INO<sub>3</sub> [M<sup>+</sup>] 457.0175, found 457.0183.

### 3-Iodobenzofuran 9{8}

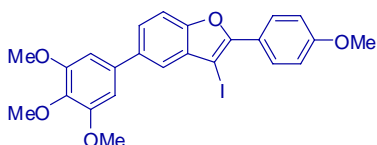

The product was obtained as a pale yellow solid (90% yield): mp 130-131 °C (uncorrected); <sup>1</sup>H NMR (400 MHz, CDCl<sub>3</sub>) δ 3.88 (s, 3H), 3.91 (s, 3H), 3.96 (s, 6H), 6.83 (s, 2H), 7.03 (d, *J* = 8.9 Hz, 2H), 7.50-7.53 (m, 3H), 8.14 (d, *J* = 8.9 Hz, 2H); <sup>13</sup>C NMR (100 MHz, CDCl<sub>3</sub>) δ 55.6, 56.5 (×2), 59.7, 61.2, 105.0,

111.3, 114.2 ( $\times 2$ ), 115.5, 117.0, 120.0, 122.6, 125.0, 128.0, 129.2 ( $\times 2$ ), 133.2, 137.6, 153.6, 154.2, 160.6; HRMS calcd for  $C_{24}H_{21}IO_5 [M^+]$  516.0434, found 516.0437.

### 3-Iodobenzofuran 9{10}

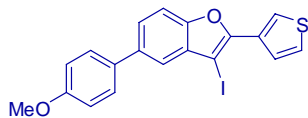

The product was obtained as a yellow solid (91% yield): mp 128-131 °C (uncorrected);  $^1H$  NMR (400 MHz,  $CDCl_3$ )  $\delta$  3.83 (s, 3H), 6.98 (d,  $J = 8.7$  Hz, 2H), 7.39-7.44 (m, 1H), 7.45-7.52 (m, 3H), 7.55 (d,  $J = 8.7$  Hz, 2H), 7.90 (dd,  $J = 5.1, 1.2$  Hz, 1H), 8.16 (m, 1H);  $^{13}C$  NMR (100 MHz,  $CDCl_3$ )  $\delta$  55.6, 60.8, 111.3, 114.4 ( $\times 2$ ), 119.5, 124.8, 125.0, 126.1, 126.5, 128.6 ( $\times 2$ ), 131.3, 132.8, 133.9, 137.1, 151.4, 152.9, 159.2; HRMS calcd for  $C_{19}H_{13}IO_2S [M^+]$  431.9681, found 431.9688.

### 3-Iodobenzofuran 9{11}

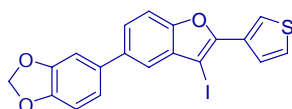

The product was obtained as a yellow oil (83% yield):  $^1H$  NMR (400 MHz,  $CDCl_3$ )  $\delta$  6.00 (s, 2H), 6.89 (d,  $J = 8.0$  Hz, 1H), 7.06-7.12 (m, 2H), 7.41-7.54 (m, 4H), 7.91 (dd,  $J = 5.2, 1.1$  Hz, 1H), 8.18 (dd,  $J = 2.9, 1.1$  Hz, 1H);  $^{13}C$  NMR (100 MHz,  $CDCl_3$ )  $\delta$  60.8, 101.4, 108.2, 108.8, 111.3, 119.8, 121.1, 124.9, 125.1, 126.2, 126.5, 131.3, 132.8, 135.7, 137.2, 147.1, 148.3, 151.5, 153.0; calcd for  $C_{19}H_{11}IO_3S [M^+]$  445.9474, found 445.9479.

### 3-Iodobenzofuran 9{13}

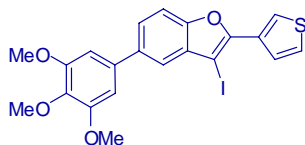

The product was obtained as a pale yellow solid (88% yield): mp 113-115 °C (uncorrected);  $^1H$  NMR (400 MHz,  $CDCl_3$ )  $\delta$  3.92 (s, 3H), 3.95 (s, 6H), 6.81 (s, 2H), 7.41-7.43 (m, 1H), 7.47-7.52 (m, 3H), 7.90-7.92 (m, 1H), 8.18-8.20 (m, 1H);  $^{13}C$  NMR (100 MHz,  $CDCl_3$ )  $\delta$  56.4 ( $\times 2$ ), 60.6, 61.1, 104.9 ( $\times 2$ ), 111.3, 119.9, 124.9, 125.3, 126.2, 126.4, 131.1, 132.7, 137.4, 137.6, 151.6, 153.1, 153.5 ( $\times 2$ ); HRMS calcd for  $C_{21}H_{17}IO_4S [M^+]$  491.9892, found 491.9902.

### 3-Iodobenzofuran 9{14}

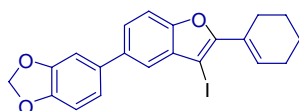

The product was obtained as a colorless oil that solidified upon standing to a dark black semi-solid (91% yield):  $^1H$  NMR (400 MHz,  $CDCl_3$ )  $\delta$  1.67-1.72 (m, 2H), 1.76-1.81 (m, 2H), 2.27-2.30 (m, 2H), 2.61-2.64 (m, 2H), 6.00 (s, 2H), 6.79-6.84 (m, 1H), 6.89 (d,  $J = 8.0$  Hz, 1H), 7.08 (d,  $J = 8.0$  Hz, 1H), 7.08-7.11 (m,

1H), 7.36-7.47 (m, 3H); <sup>13</sup>C NMR (100 MHz, CDCl<sub>3</sub>) δ 21.9, 22.7, 25.9, 26.9, 59.2, 101.3, 108.2, 108.7, 111.1, 111.4, 119.8, 121.1, 124.6, 128.1, 132.1, 135.9, 136.9, 147.0, 148.2, 152.8, 155.9; HRMS calcd for C<sub>21</sub>H<sub>17</sub>IO<sub>3</sub> [M<sup>+</sup>] 444.0222, found 444.0232.

### 3-Iodobenzofuran 9{15}

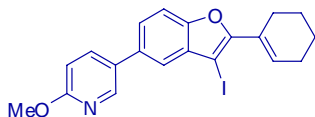

The product was obtained as a pale yellow semi-solid (88% yield): <sup>1</sup>H NMR (400 MHz, CDCl<sub>3</sub>) δ 1.58-1.84 (m, 2H), 2.01-2.15 (m, 2H), 2.21-2.36 (m, 2H), 2.45-2.60 (m, 2H), 4.00 (s, 3H), 6.84 (d, *J* = 8.6 Hz, 1H), 6.89 (dd, *J* = 5.1, 2.9 Hz, 1H), 7.47-7.56 (m, 3H), 7.84 (dd, *J* = 8.6, 2.5 Hz, 1H), 8.42 (d, *J* = 2.4 Hz, 1H); <sup>13</sup>C NMR (100 MHz, CDCl<sub>3</sub>) δ 16.4, 25.9, 32.0, 53.8, 54.1, 61.9, 111.0, 111.8, 120.0, 124.9, 129.2, 130.4, 132.9, 134.0, 136.4, 138.0, 145.3, 153.2, 153.5, 163.7; calcd for C<sub>20</sub>H<sub>18</sub>INO<sub>2</sub> [M<sup>+</sup>] 431.0382, found 431.0393.

### 3-Iodobenzofuran 9{16}

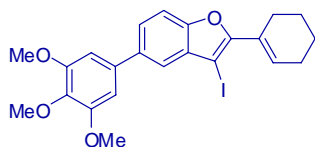

The product was obtained as a pale yellow semi-solid (92% yield): <sup>1</sup>H NMR (400 MHz, CDCl<sub>3</sub>) δ 1.67-1.72 (m, 2H), 1.76-1.81 (m, 2H), 2.27-2.30 (m, 2H), 2.61-2.64 (m, 2H), 3.91 (s, 3H), 3.95 (s, 6H), 6.78-6.84 (m, 1H), 6.81 (s, 2H), 7.40-7.48 (m, 3H); <sup>13</sup>C NMR (100 MHz, CDCl<sub>3</sub>) δ 21.9, 22.7, 25.9, 26.9, 56.5, 59.1 (×2), 61.2, 105.0 (×2), 111.1, 120.0, 124.8, 128.1, 132.3, 132.9, 137.3, 137.6, 137.7, 153.0, 153.6 (×2), 156.0; HRMS calcd for C<sub>23</sub>H<sub>23</sub>IO<sub>4</sub> [M<sup>+</sup>] 490.0641, found 490.0657.

### 3-Iodobenzofuran 9{17}

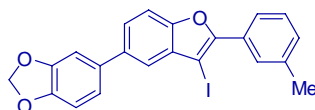

The product was obtained as a pale yellow solid (87% yield): mp 123-124 °C (uncorrected); <sup>1</sup>H NMR (400 MHz, CDCl<sub>3</sub>) δ 2.41 (s, 3H), 5.94 (s, 2H), 6.85 (d, *J* = 8.0 Hz, 1H), 7.05 (d, *J* = 8.0 Hz, 1H), 7.04-7.08 (m, 1H), 7.19 (d, *J* = 7.5 Hz, 1H), 7.33 (t, *J* = 7.7 Hz, 1H), 7.41 (s, 2H), 7.47 (s, 1H), 7.93 (s, 1H), 7.96 (d, *J* = 7.8 Hz, 1H); <sup>13</sup>C NMR (100 MHz, CDCl<sub>3</sub>) δ 21.7, 61.3, 101.3, 108.1, 108.7, 111.3, 120.0, 121.0, 124.8, 125.1, 128.1, 128.5, 129.9, 130.2, 133.0, 135.7, 137.0, 138.3, 147.0, 148.2, 153.3, 153.8; HRMS calcd for C<sub>22</sub>H<sub>15</sub>IO<sub>3</sub> [M<sup>+</sup>] 454.0066, found 454.0073.

### 3-Iodobenzofuran 9{18}

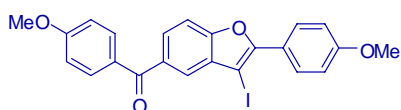

The product was obtained as an ivory solid (82% yield): mp 136-137 °C (uncorrected); <sup>1</sup>H NMR (400 MHz, CDCl<sub>3</sub>) δ 3.87 (s, 3H), 3.90 (s, 3H), 6.99 (d, *J* = 8.8 Hz, 2H), 7.02 (d, *J* = 8.9 Hz, 2H), 7.51 (d, *J* = 8.5 Hz, 1H), 7.78 (dd, *J* = 1.7, 8.5 Hz, 1H), 7.82-7.87 (m, 1H), 7.86 (d, *J* = 8.8 Hz, 2H), 8.13 (d, *J* = 8.9 Hz, 2H); <sup>13</sup>C NMR (100 MHz, CDCl<sub>3</sub>) δ 55.6, 55.7, 59.7, 111.0, 113.7 (×2), 114.2 (×2), 122.2, 124.1, 127.6, 129.3 (×2), 130.7, 132.7 (×2), 134.2, 154.8, 156.0, 160.8, 163.3, 195.2; HRMS calcd for C<sub>23</sub>H<sub>17</sub>IO<sub>4</sub> [M<sup>+</sup>] 484.0172, found 484.0180.

### 3-Iodobenzofuran 9{19}

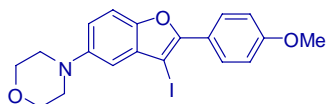

The product was obtained as a yellow solid (84% yield): mp 147-149 °C (uncorrected); <sup>1</sup>H NMR (400 MHz, CDCl<sub>3</sub>) δ 3.16 (t, *J* = 4.7 Hz, 4H), 3.83 (s, 3H), 3.89 (t, *J* = 4.7 Hz, 4H), 6.86 (d, *J* = 2.4 Hz, 1H), 6.96-6.99 (m, 1H), 6.98 (d, *J* = 8.9 Hz, 2H), 7.34 (d, *J* = 8.9 Hz, 1H), 8.08 (d, *J* = 8.9 Hz, 2H); <sup>13</sup>C NMR (100 MHz, CDCl<sub>3</sub>) δ 51.3 (×2), 55.5, 59.9, 67.2 (×2), 108.1, 111.5, 114.0 (×2), 116.4, 122.8, 129.0 (×2), 133.1, 148.8, 149.0, 153.8, 160.3; HRMS calcd for C<sub>19</sub>H<sub>18</sub>INO<sub>3</sub> [M<sup>+</sup>] 435.0331, found 435.0339.

### 3-Iodobenzofuran 9{20}

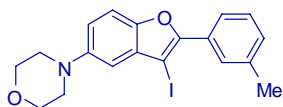

The product was obtained as a yellow solid (82% yield): mp 112-113.5 °C (uncorrected); <sup>1</sup>H NMR (400 MHz, CDCl<sub>3</sub>) δ 2.44 (s, 3H), 3.18 (t, *J* = 4.7 Hz, 4H), 3.90 (t, *J* = 4.7 Hz, 4H), 6.88 (d, *J* = 2.2 Hz, 1H), 7.00 (dd, *J* = 2.3, 8.9 Hz, 1H), 7.21 (d, *J* = 7.6 Hz, 1H), 7.36 (m, 2H), 7.96 (s, 1H), 7.96 (d, *J* = 8.1 Hz, 1H); <sup>13</sup>C NMR (100 MHz, CDCl<sub>3</sub>) δ 21.8, 51.3 (×2), 61.2, 67.2 (×2), 108.3, 111.7, 116.9, 124.8, 128.1, 128.5, 130.1, 130.2, 133.1, 138.3, 148.9, 149.2, 153.9; HRMS calcd for C<sub>19</sub>H<sub>18</sub>INO<sub>2</sub> [M<sup>+</sup>] 419.0382, found 419.0390.

### 3-Iodobenzofuran 9{21}

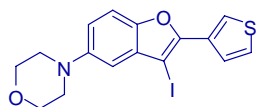

The product was obtained as a yellow solid (81% yield): mp 141-142 °C (uncorrected); <sup>1</sup>H NMR (400 MHz, CDCl<sub>3</sub>) δ 3.16 (t, *J* = 4.7 Hz, 4H), 3.88 (t, *J* = 4.7 Hz, 4H), 6.84 (d, *J* = 2.2 Hz, 1H), 6.96 (dd, *J* = 8.9, 2.4 Hz, 1H), 7.33 (d, *J* = 8.9 Hz, 1H), 7.36-7.40 (m, 1H), 7.87-7.89 (m, 1H), 8.13-8.14 (m, 1H); <sup>13</sup>C NMR (100 MHz, CDCl<sub>3</sub>) δ 51.2 (×2), 60.9, 67.2 (×2), 108.0, 111.6, 116.6, 124.5, 126.0, 126.4, 131.4, 132.8, 148.7, 148.8, 151.4; HRMS calcd for C<sub>16</sub>H<sub>14</sub>INO<sub>2</sub>S [M<sup>+</sup>] 410.979022, found 410.9796.

### 3-Iodobenzofuran 9{23}

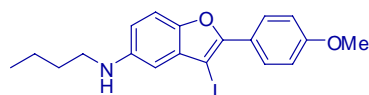

The product was obtained as a pale yellow semi-solid (51% yield):  $^1\text{H}$  NMR (400 MHz,  $\text{CDCl}_3$ )  $\delta$  0.98 (t,  $J = 7.6$  Hz, 3H), 1.42-1.50 (m, 2H), 1.61-1.69 (m, 2H), 3.17 (t,  $J = 7.2$  Hz, 2H), 3.86 (s, 3H), 6.55 (d,  $J = 2.0$  Hz, 1H), 6.63 (dd,  $J = 2.4, 8.8$  Hz, 1H), 6.99 (d,  $J = 8.8$  Hz, 2H), 7.24 (d,  $J = 8.8$  Hz, 1H), 8.08 (d,  $J = 8.8$  Hz, 2H);  $^{13}\text{C}$  NMR (100 MHz,  $\text{CDCl}_3$ )  $\delta$  14.2, 20.6, 31.9, 45.0, 55.6, 59.7, 103.1, 111.6, 113.4, 114.0 ( $\times 2$ ), 123.1, 129.0 ( $\times 2$ ), 133.5, 145.5, 147.7, 153.5, 160.3; HRMS calcd for  $\text{C}_{19}\text{H}_{20}\text{INO}_2$  [ $\text{M}^+$ ] 421.0539, found 421.0549.

### General procedure for Suzuki-Miyaura coupling to prepare 14{1-31}

To a 4 dram vial was added the appropriate 3-iodobenzofuran **9** (0.8-1.5 mmol), boronic acid **10** (1.5 equiv), KOH (3.0 equiv) and 5 mol %  $\text{Pd}(\text{PPh}_3)_4$  in 20:5:1 toluene/ethanol/ $\text{H}_2\text{O}$ . The solution was vigorously stirred for 5 min at room temperature, flushed with argon, and then heated to 80  $^\circ\text{C}$  until TLC revealed complete conversion of the starting material. Upon cooling to room temperature, the resulting reaction mixture was extracted with EtOAc. The combined organic layers were dried over  $\text{MgSO}_4$ , concentrated, and purified by either column chromatography or preparative HPLC to afford the corresponding product.

### 2,3,5-Trisubstituted benzo[b]furan 14{6}

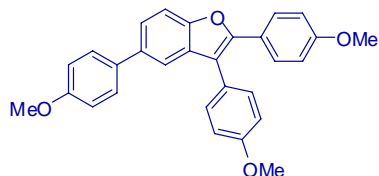

The product was obtained as a pale yellow oil that solidified upon standing to a yellow solid (88% yield):  $^1\text{H}$  NMR (400 MHz,  $\text{CDCl}_3$ )  $\delta$  3.81 (s, 3H), 3.83 (s, 3H), 3.88 (s, 3H), 6.85 (d,  $J = 8.8$  Hz, 2H), 6.95 (d,  $J = 8.8$  Hz, 2H), 7.01 (d,  $J = 8.7$  Hz, 2H), 7.43 (d,  $J = 8.7$  Hz, 2H), 7.47 (dd,  $J = 1.7, 8.5$  Hz, 1H), 7.52-7.55 (m, 1H), 7.53 (d,  $J = 8.8$  Hz, 2H), 7.57 (s, 1H), 7.61 (d,  $J = 8.8$  Hz, 2H);  $^{13}\text{C}$  NMR (100 MHz,  $\text{CDCl}_3$ )  $\delta$  55.48, 55.50, 55.56, 111.2, 114.1 ( $\times 2$ ), 114.3 ( $\times 2$ ), 114.7 ( $\times 2$ ), 115.5, 116.0, 117.9, 123.7, 125.3, 128.5 ( $\times 2$ ), 128.6 ( $\times 2$ ), 131.1 ( $\times 2$ ), 131.3, 134.5, 136.3, 151.2, 153.3, 159.0, 159.2, 159.8; HRMS calcd for  $\text{C}_{29}\text{H}_{25}\text{O}_4$  [ $\text{M}+\text{H}^+$ ] 437.1753, found 437.1744.

### 2,3,5-Trisubstituted benzo[b]furan 14{22}

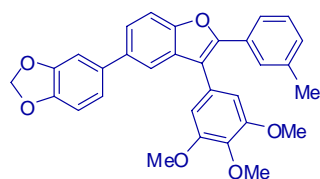

The product was obtained as a pale yellow oil that solidified upon standing to a yellow solid (73% yield):

$^1\text{H}$  NMR (400 MHz,  $\text{CDCl}_3$ )  $\delta$  2.35 (s, 3H), 3.81 (s, 6H), 3.96 (s, 3H), 5.99 (s, 2H), 2.03 (s, 2H), 6.88 (d,  $J = 7.9$  Hz, 1H), 7.03-7.08 (m, 2H), 7.11-7.15 (m, 1H), 7.18-7.23 (m, 1H), 7.43-7.50 (m, 2H), 7.56-7.63 (m, 3H);  $^{13}\text{C}$  NMR (100 MHz,  $\text{CDCl}_3$ )  $\delta$  21.8, 56.5 ( $\times 2$ ), 61.3, 101.4, 107.0 ( $\times 2$ ), 108.2, 108.8, 111.4, 117.7, 118.3, 121.0, 124.4, 127.6, 127.9, 128.5, 129.5, 130.5, 130.8, 131.0, 136.3, 136.7, 137.8, 138.3, 147.0, 148.3, 151.5, 153.5, 153.9 ( $\times 2$ ); HRMS calcd for  $\text{C}_{31}\text{H}_{27}\text{O}_6$  [ $\text{M}+\text{H}^+$ ] 495.1808, found 495.1802.

### 2,3,5-Trisubstituted benzo[*b*]furan 14{24}

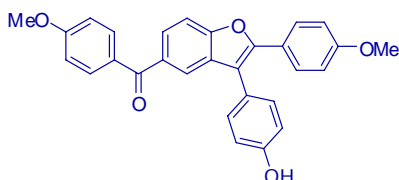

The product was obtained as a pale yellow oil that solidified upon standing to a yellow solid (69% yield):  $^1\text{H}$  NMR (400 MHz,  $\text{CDCl}_3$ )  $\delta$  3.81 (s, 3H), 3.87 (s, 3H), 6.86 (d,  $J = 8.9$  Hz, 2H), 6.96 (d,  $J = 8.5$  Hz, 4H), 7.33 (d,  $J = 8.6$  Hz, 2H), 7.55 (d,  $J = 8.5$  Hz, 1H), 7.62 (d,  $J = 8.9$  Hz, 2H), 7.71 (dd,  $J = 1.7, 8.5$  Hz, 1H), 7.84 (d,  $J = 8.8$  Hz, 2H), 7.97 (d,  $J = 1.4$  Hz, 1H);  $^{13}\text{C}$  NMR (100 MHz,  $\text{CDCl}_3$ )  $\delta$  55.5, 55.7, 110.6, 113.8 ( $\times 2$ ), 114.2 ( $\times 2$ ), 116.2, 116.4 ( $\times 2$ ), 122.5, 123.1, 124.0, 127.0, 128.7 ( $\times 2$ ), 130.7, 131.0, 131.1 ( $\times 2$ ), 132.9 ( $\times 2$ ), 133.4, 152.1, 156.1, 156.2, 160.0, 163.4, 196.6; HRMS calcd for  $\text{C}_{29}\text{H}_{23}\text{O}_5$  [ $\text{M}+\text{H}^+$ ] 451.1545, found 451.1548.

### 2,3,5-Trisubstituted benzo[*b*]furan 14{25}

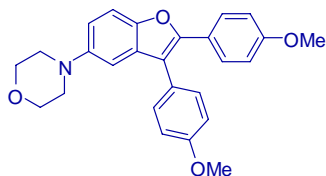

The product was obtained as a yellow oil that solidified upon standing to a yellow solid (85% yield):  $^1\text{H}$  NMR (400 MHz,  $\text{CDCl}_3$ )  $\delta$  3.11 (t,  $J = 4.7$  Hz, 4H), 3.80 (s, 3H), 3.87 (t,  $J = 4.7$  Hz, 4H), 3.88 (s, 3H), 6.84 (d,  $J = 8.9$  Hz, 2H), 6.91-7.10 (m, 2H), 7.01 (d,  $J = 8.7$  Hz, 2H), 7.39 (d,  $J = 8.7$  Hz, 2H), 7.40-7.43 (m, 1H), 7.56 (d,  $J = 8.9$  Hz, 2H);  $^{13}\text{C}$  NMR (100 MHz,  $\text{CDCl}_3$ )  $\delta$  51.74 ( $\times 2$ ), 55.46, 55.48, 67.2 ( $\times 2$ ), 106.8, 111.4, 114.0 ( $\times 2$ ), 114.7 ( $\times 2$ ), 115.6, 115.9, 123.7, 125.4, 126.5, 128.4 ( $\times 2$ ), 131.1 ( $\times 2$ ), 131.4, 149.4, 151.4, 159.1, 159.7; HRMS calcd for  $\text{C}_{26}\text{H}_{26}\text{NO}_4$  [ $\text{M}+\text{H}^+$ ] 416.1862, found 416.1851.

### 2,3,5-Trisubstituted benzo[*b*]furan 14{27}

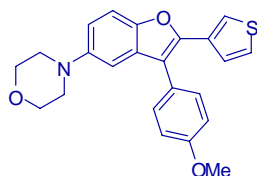

The product was obtained as a yellow oil that solidified upon standing to a yellow solid (83% yield):  $^1\text{H}$  NMR (400 MHz,  $\text{CDCl}_3$ )  $\delta$  3.10 (t,  $J = 4.7$  Hz, 4H), 3.86 (t,  $J = 4.7$  Hz, 4H), 3.89 (s, 3H), 6.91 (d,  $J = 2.3$



Hz, 1H), 6.98 (dd,  $J = 2.4, 8.9$  Hz, 1H), 7.04 (d,  $J = 8.7$  Hz, 2H), 7.18 (d,  $J = 1.2, 5.1$  Hz, 1H), 7.23-7.25 (m, 1H), 7.40-7.43 (m, 1H), 7.42 (d,  $J = 8.7$  Hz, 2H), 7.55 (dd,  $J = 3.0, 1.2$  Hz, 1H);  $^{13}\text{C}$  NMR (100 MHz,  $\text{CDCl}_3$ )  $\delta$  51.6 ( $\times 2$ ), 55.5, 67.2 ( $\times 2$ ), 106.8, 114.4, 114.6 ( $\times 2$ ), 115.0, 115.8, 116.5, 122.7, 124.9, 125.8, 126.1, 131.1, 131.2 ( $\times 2$ ), 132.2, 148.5, 149.3, 159.4; HRMS calcd for  $\text{C}_{23}\text{H}_{22}\text{NO}_3\text{S}$  [ $\text{M}+\text{H}^+$ ] 392.1320, found 392.1312.

### 2,3,5-Trisubstituted benzo[*b*]furan 14{28}

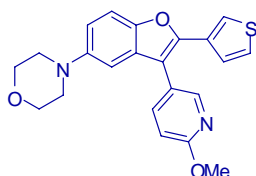

The product was obtained as a yellow oil that solidified upon standing to a yellow solid (71% yield):  $^1\text{H}$  NMR (400 MHz,  $\text{CDCl}_3$ )  $\delta$  3.12 (t,  $J = 4.7$  Hz, 4H), 3.88 (t,  $J = 4.7$  Hz, 4H), 4.03 (s, 3H), 6.86-6.92 (m, 2H), 7.02 (d,  $J = 8.9$  Hz, 1H), 7.16-7.30 (m, 1H), 7.44 (d,  $J = 8.9$  Hz, 1H), 7.55-7.59 (m, 1H), 7.69 (dd,  $J = 2.3, 8.5$  Hz, 1H), 8.33 (d,  $J = 1.7$  Hz, 1H);  $^{13}\text{C}$  NMR (100 MHz,  $\text{CDCl}_3$ )  $\delta$  51.6 ( $\times 2$ ), 53.9, 67.2 ( $\times 2$ ), 101.3, 106.4, 111.5, 111.6, 113.2, 116.1, 121.7, 123.2, 125.9, 126.3, 126.7, 130.8, 131.8, 140.5, 147.7, 149.1, 163.9; HRMS calcd for  $\text{C}_{22}\text{H}_{21}\text{N}_2\text{O}_3\text{S}$  [ $\text{M}+\text{H}^+$ ] 393.1273, found 393.1270.

### 2,3,5-Trisubstituted benzo[*b*]furan 14{31}

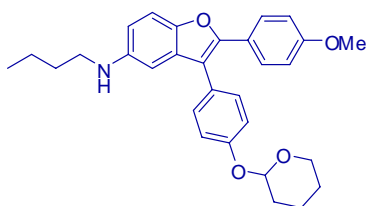

The product was obtained as a yellow oil that solidified upon standing to a dark yellow solid (68% yield):  $^1\text{H}$  NMR (400 MHz,  $\text{CDCl}_3$ )  $\delta$  0.94 (t,  $J = 7.3$  Hz, 3H), 1.37-1.48 (m, 2H), 1.57-1.75 (m, 6H), 1.87-1.94 (m, 2H), 3.10 (t,  $J = 7.2$  Hz, 2H), 3.64-4.05 (m, 2H), 3.81 (s, 3H), 5.49 (t,  $J = 3.3$  Hz, 1H), 6.63-6.69 (m, 2H), 6.82 (d,  $J = 8.9$  Hz, 2H), 7.14 (d,  $J = 8.7$  Hz, 2H), 7.32 (d,  $J = 9.3$  Hz, 1H), 7.38 (d,  $J = 8.6$  Hz, 2H), 7.56 (d,  $J = 8.9$  Hz, 2H);  $^{13}\text{C}$  NMR (100 MHz,  $\text{CDCl}_3$ )  $\delta$  14.2, 19.3, 25.5, 30.7, 31.8, 45.6, 55.5, 62.7, 96.8, 111.4, 112.7, 114.0 ( $\times 2$ ), 115.7, 116.1, 117.0 ( $\times 2$ ), 118.1, 123.9, 126.7, 128.4 ( $\times 2$ ), 131.0, 131.5, 148.2, 151.0, 156.6, 159.6; HRMS calcd for  $\text{C}_{30}\text{H}_{34}\text{NO}_4$  [ $\text{M}+\text{H}^+$ ] 472.2488, found 472.2456.

### General procedure for carbonylative Suzuki coupling to prepare 14{32-45}

A mixture of 3-iodobenzofuran **9** (0.1 mmol), boronic acid **10** (1.1 equiv),  $\text{K}_2\text{CO}_3$  (3.0 equiv), NaI (3.0 equiv) and 3 mol %  $\text{PdCl}_2(\text{PPh}_3)_2$  in anisole (2.0 mL) were added to a vial with a magnetic stir bar under an Ar atmosphere. After sealing the vial, the atmosphere was changed to carbon monoxide and the reaction mixture was kept at 80 °C for 12 h with vigorous stirring. Upon cooling to room temperature, the reaction mixture was diluted with EtOAc. The crude product was purified by column chromatography on

silica gel with ethyl acetate/hexanes as the eluent to afford both the corresponding carbonyl-containing product **14**{32,34,36,38,40,42,44} and the direct coupling product **14**{33,35,37,39,41,43,45}.

### 2,3,5-Trisubstituted benzo[*b*]furan **14**{34}

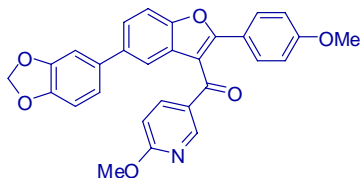

The product was obtained as a pale yellow oil (44% yield):  $^1\text{H}$  NMR (400 MHz,  $\text{CDCl}_3$ )  $\delta$  3.81 (s, 3H), 3.94 (s, 3H), 5.99 (s, 2H), 6.70 (d,  $J = 8.7$  Hz, 1H), 6.85-6.89 (m, 1H), 6.86 (d,  $J = 9.0$  Hz, 2H), 7.00-7.07 (m, 2H), 7.49 (dd,  $J = 1.8, 8.4$  Hz, 1H), 7.58 (d,  $J = 8.4$  Hz, 1H), 7.63 (d,  $J = 9.0$  Hz, 2H), 7.70 (d,  $J = 0.8$  Hz, 1H), 8.07 (dd,  $J = 2.4, 8.7$  Hz, 1H), 8.62 (d,  $J = 2.4$  Hz, 1H);  $^{13}\text{C}$  NMR (100 MHz,  $\text{CDCl}_3$ )  $\delta$  54.3, 55.6, 101.3, 108.2, 108.7, 111.1, 111.4, 114.3 ( $\times 2$ ), 115.5, 119.3, 121.1, 121.9, 124.8, 127.5, 129.1, 130.3 ( $\times 2$ ), 135.8, 137.5, 139.7, 147.1, 148.2, 151.3, 153.3, 158.3, 158.6, 161.1, 166.9, 189.9; HRMS calcd for  $\text{C}_{29}\text{H}_{22}\text{NO}_6$  [ $\text{M}+\text{H}^+$ ] 480.1447, found 480.1456.

### 2,3,5-Trisubstituted benzo[*b*]furan **14**{38}

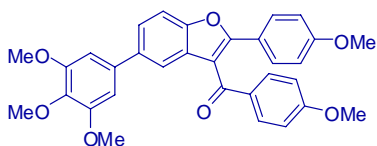

The product was obtained as a pale yellow oil (41% yield):  $^1\text{H}$  NMR (400 MHz,  $\text{CDCl}_3$ )  $\delta$  3.82 (s, 3H), 3.83 (s, 3H), 3.88 (s, 3H), 3.91 (s, 6H), 6.73 (s, 2H), 6.83 (d,  $J = 8.9$  Hz, 2H), 6.86 (d,  $J = 8.9$  Hz, 2H), 7.47-7.53 (m, 1H), 7.58-7.65 (m, 2H), 7.69 (d,  $J = 8.9$  Hz, 2H), 7.89 (d,  $J = 8.9$  Hz, 2H);  $^{13}\text{C}$  NMR (100 MHz,  $\text{CDCl}_3$ )  $\delta$  55.56, 55.69, 56.4 ( $\times 2$ ), 61.2, 104.8 ( $\times 2$ ), 111.3, 113.9 ( $\times 2$ ), 114.2 ( $\times 2$ ), 115.2, 119.7, 122.2, 124.6, 129.6, 130.0 ( $\times 2$ ), 130.8, 132.5 ( $\times 2$ ), 132.55, 137.55, 137.61, 143.7, 153.5 ( $\times 2$ ), 160.9, 163.88, 163.93; HRMS calcd for  $\text{C}_{32}\text{H}_{29}\text{O}_7$  [ $\text{M}+\text{H}^+$ ] 525.1913, found 525.1918.

### 2,3,5-Trisubstituted benzo[*b*]furan **14**{39}

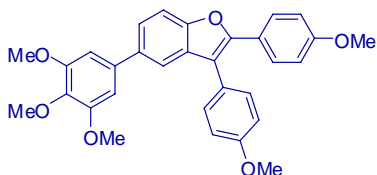

The product was obtained as a pale yellow oil that solidified upon standing to a yellow solid (31% yield):  $^1\text{H}$  NMR (400 MHz,  $\text{CDCl}_3$ )  $\delta$  3.82 (s, 3H), 3.89 (s, 6H), 3.91 (s, 6H), 6.76 (s, 2H), 6.87 (d,  $J = 8.9$  Hz, 2H), 7.02 (d,  $J = 8.6$  Hz, 2H), 7.45 (d,  $J = 8.7$  Hz, 2H), 7.45-7.48 (m, 1H), 7.49-7.58 (m, 2H), 7.61 (d,  $J = 8.9$  Hz, 2H);  $^{13}\text{C}$  NMR (100 MHz,  $\text{CDCl}_3$ )  $\delta$  55.49, 55.51, 56.5 ( $\times 2$ ), 61.2, 105.0 ( $\times 2$ ), 111.2, 114.1 ( $\times 2$ ), 114.7 ( $\times 2$ ), 115.9, 118.2, 123.5, 124.1, 125.2, 128.6 ( $\times 2$ ), 131.1 ( $\times 2$ ), 131.2, 137.0, 137.4, 138.2, 151.5, 153.5 ( $\times 2$ ), 153.6, 159.2, 159.9; HRMS calcd for  $\text{C}_{31}\text{H}_{29}\text{O}_6$  [ $\text{M}+\text{H}^+$ ] 497.1964, found 497.1967.

### General procedure for Sonogashira coupling to prepare **14**{46-77}

To a 4 dram vial was added the appropriate 3-iodobenzofuran **9** (0.8-1.5 mmol), the alkyne **6** (1.2 equiv), 3 mol % PdCl<sub>2</sub>(PPh<sub>3</sub>)<sub>2</sub>, 3 mol % CuI, DMF (1.5 mL) and Et<sub>2</sub>NH (1.5 mL). The solution was stirred at room temperature and flushed with argon, and then heated to 50 °C until TLC revealed complete conversion of the starting material. The solution was allowed to cool and diluted with EtOAc. The combined organic layers were dried over MgSO<sub>4</sub>, concentrated, and purified by either column chromatography or preparative HPLC to afford the corresponding product.

### 2,3-Disubstituted furo[*b*]pyridine **14**{49}

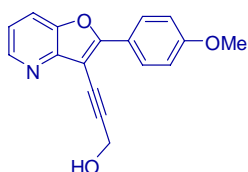

The product was obtained as a yellow oil that solidified upon standing to a dark yellow solid (77% yield): <sup>1</sup>H NMR (400 MHz, CDCl<sub>3</sub>) δ 2.51 (br s, 1H), 3.85 (s, 3H), 4.70 (s, 2H), 6.98 (d, *J* = 9.0 Hz, 2H), 7.19 (dd, *J* = 8.3, 4.8 Hz, 1H), 7.70 (dd, *J* = 8.2, 1.1 Hz, 1H), 8.22 (d, *J* = 9.0 Hz, 2H), 8.56 (dd, *J* = 4.8, 1.1 Hz, 1H); <sup>13</sup>C NMR (100 MHz, CDCl<sub>3</sub>) δ 51.8, 55.6, 75.9, 97.2, 98.0, 114.4 (×2), 118.2, 119.3, 122.1, 128.1 (×2), 146.2, 146.8, 149.0, 159.8, 161.2; HRMS calcd for C<sub>17</sub>H<sub>14</sub>NO<sub>3</sub> [M+H<sup>+</sup>] 280.0974, found 280.0987.

### 2,3,5-Trisubstituted benzo[*b*]furan **14**{62}

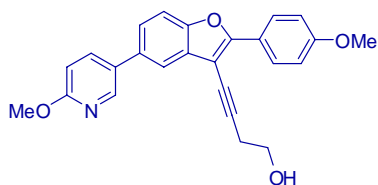

The product was obtained as a pale yellow oil that solidified upon standing to a yellow solid (79% yield): <sup>1</sup>H NMR (400 MHz, CDCl<sub>3</sub>) δ 2.18 (br s, 1H), 2.88 (t, *J* = 6.3 Hz, 2H), 3.87 (s, 3H), 3.93 (br s, 2H), 3.99 (s, 3H), 6.82 (d, *J* = 8.5 Hz, 1H), 7.00 (d, *J* = 8.9 Hz, 2H), 7.40 (dd, *J* = 1.7, 8.5 Hz, 1H), 7.49 (dd, *J* = 1.9, 8.5 Hz, 1H), 7.68 (d, *J* = 1.3 Hz, 1H), 7.83 (dd, *J* = 2.5, 8.5 Hz, 1H), 8.21 (d, *J* = 8.9 Hz, 2H), 8.43 (d, *J* = 2.1 Hz, 1H); <sup>13</sup>C NMR (100 MHz, CDCl<sub>3</sub>) δ 24.7, 53.8, 55.6, 61.5, 74.2, 94.2, 97.6, 110.9, 111.5, 114.3 (×2), 118.1, 123.0, 124.0, 127.7 (×2), 130.6, 131.2, 133.6, 138.0, 145.3, 152.9, 157.3, 160.5, 163.6; HRMS calcd for C<sub>25</sub>H<sub>22</sub>NO<sub>4</sub> [M+H<sup>+</sup>] 400.1549, found 400.1552.

### 2,3,5-Trisubstituted benzo[*b*]furan **14**{67}

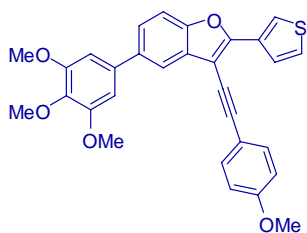

The product was obtained as a pale yellow oil that solidified upon standing to a yellow solid (82% yield):  $^1\text{H}$  NMR (400 MHz,  $\text{CDCl}_3$ )  $\delta$  3.86 (s, 3H), 3.91 (s, 3H), 3.96 (s, 6H), 6.83 (s, 3H), 6.94 (d,  $J = 8.8$  Hz, 2H), 7.44 (dd,  $J = 5.1, 3.0$  Hz, 1H), 7.48-7.53 (m, 2H), 7.57 (d,  $J = 8.8$  Hz, 2H), 7.82 (d,  $J = 1.0$  Hz, 1H), 7.98 (dd,  $J = 5.1, 0.8$  Hz, 1H), 8.16 (dd,  $J = 3.0, 0.8$  Hz, 1H);  $^{13}\text{C}$  NMR (100 MHz,  $\text{CDCl}_3$ )  $\delta$  55.6, 56.5 ( $\times 2$ ), 61.2, 79.6, 96.9, 105.0 ( $\times 2$ ), 111.4, 114.4 ( $\times 2$ ), 115.5, 118.8, 123.9, 124.9, 125.8, 126.4, 130.2, 131.8, 133.2 ( $\times 2$ ), 134.2, 135.4, 137.6, 137.8, 153.1, 153.6 ( $\times 2$ ), 154.5, 160.1; HRMS calcd for  $\text{C}_{30}\text{H}_{25}\text{O}_5\text{S}$  [ $\text{M}+\text{H}^+$ ] 497.1423, found 497.1421.

**2,3,5-Trisubstituted benzo[b]furan 14{75}**

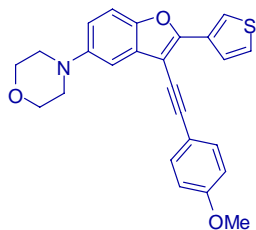

The product was obtained as a pale yellow oil that solidified upon standing to a yellow solid (83% yield):  $^1\text{H}$  NMR (400 MHz,  $\text{CDCl}_3$ )  $\delta$  3.19 (t,  $J = 4.7$  Hz, 4H), 3.85 (s, 3H), 3.90 (t,  $J = 4.7$  Hz, 4H), 6.93 (d,  $J = 8.6$  Hz, 2H), 6.99 (dd,  $J = 2.3, 8.9$  Hz, 1H), 7.17 (d,  $J = 2.2$  Hz, 1H), 7.36 (d,  $J = 8.9$  Hz, 1H), 7.38-7.43 (m, 1H), 7.57 (d,  $J = 8.6$  Hz, 2H), 7.93 (d,  $J = 5.1$  Hz, 1H), 7.98-8.20 (m, 1H);  $^{13}\text{C}$  NMR (100 MHz,  $\text{CDCl}_3$ )  $\delta$  51.4 ( $\times 2$ ), 55.6, 67.3 ( $\times 2$ ), 79.9, 96.7, 98.7, 107.0, 111.6, 114.3 ( $\times 2$ ), 115.6, 116.3, 123.5, 125.7, 126.3, 130.4, 132.0, 133.2 ( $\times 2$ ), 148.6, 148.8, 154.4, 160.0; HRMS calcd for  $\text{C}_{25}\text{H}_{22}\text{NO}_3\text{S}$  [ $\text{M}+\text{H}^+$ ] 416.1320, found 416.1317.

**2,3,5-Trisubstituted benzo[b]furan 14{77}**

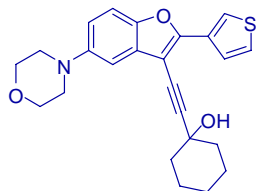

The product was obtained as a pale yellow oil that solidified upon standing to a yellow solid (86% yield):  $^1\text{H}$  NMR (400 MHz,  $\text{CDCl}_3$ )  $\delta$  1.30-1.62 (m, 8H), 2.12-2.30 (m, 2H), 2.51 (s, 1H), 3.16 (t,  $J = 4.7$  Hz, 4H), 3.91 (t,  $J = 4.7$  Hz, 4H), 6.95 (dd,  $J = 8.9, 2.5$  Hz, 1H), 7.05 (d,  $J = 2.3$  Hz, 1H), 7.35 (d,  $J = 8.9$  Hz, 1H), 7.40 (dd,  $J = 5.1, 3.0$  Hz, 1H), 7.87 (dd,  $J = 5.1, 1.2$  Hz, 1H), 8.05 (dd,  $J = 3.0, 1.2$  Hz, 1H);  $^{13}\text{C}$  NMR (100 MHz,  $\text{CDCl}_3$ )  $\delta$  23.6 ( $\times 2$ ), 25.4, 40.3 ( $\times 2$ ), 51.4 ( $\times 2$ ), 67.2 ( $\times 2$ ), 69.6, 76.0, 98.1, 100.7, 106.8,

111.6, 116.3, 123.6, 125.6, 126.3, 130.4, 131.8, 148.6, 148.7, 154.5; HRMS calcd for C<sub>24</sub>H<sub>26</sub>NO<sub>3</sub>S [M+H<sup>+</sup>] 408.1633, found 408.1628.

### General procedure for Heck coupling to prepare **14**{78-98}

To a 4 dram vial was added the appropriate 3-iodobenzofuran **9** (0.8-1.5 mmol), the styrene **12** (1.2 equiv), 5 mol % Pd(OAc)<sub>2</sub>, *n*-Bu<sub>4</sub>NI (1.0 equiv), Na<sub>2</sub>CO<sub>3</sub> (2.5 equiv) and DMF (1.5 mL). The solution was stirred at room temperature and flushed with argon, and then heated to 80 °C until TLC revealed complete conversion of the starting material. The solution was allowed to cool and diluted with EtOAc. The combined organic layers were dried over MgSO<sub>4</sub>, concentrated, and purified by either column chromatography or preparative HPLC to afford the corresponding product.

### 2,3-Disubstituted furo[*b*]pyridine **14**{81}

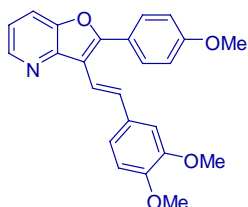

The product was obtained as a yellow oil that solidified upon standing to a dark yellow solid (72% yield): <sup>1</sup>H NMR (400 MHz, CDCl<sub>3</sub>) δ 3.90 (s, 3H), 3.91 (s, 3H), 3.94 (s, 3H), 6.88 (d, *J* = 8.3 Hz, 1H), 7.07 (d, *J* = 8.9 Hz, 2H), 7.11 (d, *J* = 1.9 Hz, 1H), 7.17-7.25 (m, 3H), 7.74 (dd, *J* = 1.3, 8.2 Hz, 1H), 7.81 (d, *J* = 8.9 Hz, 2H), 8.22 (d, *J* = 16.1 Hz, 1H), 8.63 (dd, *J* = 1.3, 4.8 Hz, 1H); <sup>13</sup>C NMR (100 MHz, CDCl<sub>3</sub>) δ 55.6, 56.1, 56.1, 109.8, 111.4, 113.9, 114.6 (×2), 116.1, 117.7, 119.0, 119.3, 123.3, 129.7 (×2), 131.5, 132.7, 145.7, 147.5, 148.1, 148.9, 149.1, 156.1, 160.7; HRMS calcd for C<sub>24</sub>H<sub>22</sub>NO<sub>4</sub> [M+H<sup>+</sup>] 388.1549, found 388.1548.

### 2,3,5-Trisubstituted benzo[*b*]furan **14**{83}

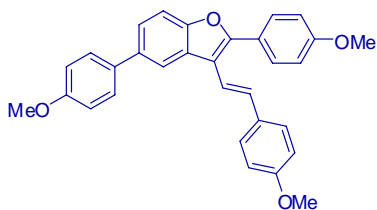

The product was obtained as a pale yellow oil that solidified upon standing to a yellow solid (69% yield): <sup>1</sup>H NMR (400 MHz, CDCl<sub>3</sub>) δ 3.84 (s, 3H), 3.87 (s, 3H), 3.88 (s, 3H), 6.93 (d, *J* = 8.8 Hz, 2H), 6.97-7.05 (m, 4H), 7.16-7.31 (m, 2H), 7.48 (d, *J* = 8.7 Hz, 2H), 7.45-7.56 (m, 2H), 7.59 (d, *J* = 8.9 Hz, 2H), 7.77 (d, *J* = 8.9 Hz, 2H), 8.02 (d, *J* = 1.3 Hz, 1H); <sup>13</sup>C NMR (100 MHz, CDCl<sub>3</sub>) δ 55.59, 55.61, 55.61, 111.4, 113.8, 114.38 (×2), 114.40 (×2), 114.45 (×2), 118.2, 119.1, 123.8, 124.0, 127.6 (×2), 128.8 (×2), 129.5 (×2), 130.5, 130.8, 130.9, 134.7, 136.6, 153.76, 153.78, 159.1, 159.4, 160.2; HRMS calcd for C<sub>31</sub>H<sub>27</sub>O<sub>4</sub> [M+H<sup>+</sup>] 463.1909, found 463.1921.

### 2,3,5-Trisubstituted benzo[*b*]furan 14{85}

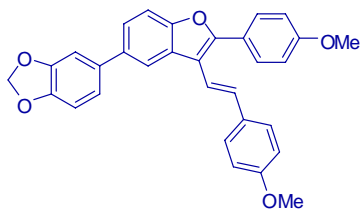

The product was obtained as a pale yellow oil that solidified upon standing to a yellow solid (76% yield):  $^1\text{H}$  NMR (400 MHz,  $\text{CDCl}_3$ )  $\delta$  3.84 (s, 3H), 3.88 (s, 3H), 6.01 (s, 2H), 6.89-6.95 (m, 1H), 6.93 (d,  $J = 8.7$  Hz, 2H), 7.04 (d,  $J = 8.9$  Hz, 2H), 7.07-7.15 (m, 2H), 7.21 (s, 1H), 7.25 (d,  $J = 1.5$  Hz, 1H), 7.44-7.55 (m, 4H), 7.77 (d,  $J = 8.9$  Hz, 2H), 7.98 (d,  $J = 1.4$  Hz, 1H);  $^{13}\text{C}$  NMR (100 MHz,  $\text{CDCl}_3$ )  $\delta$  55.59, 55.62, 101.3, 108.4, 108.8, 111.4, 113.8, 114.4 ( $\times 2$ ), 114.5 ( $\times 2$ ), 118.2, 119.2, 121.2, 123.7, 124.1, 127.6 ( $\times 2$ ), 128.8, 129.5 ( $\times 2$ ), 130.5, 130.8, 136.5, 136.7, 147.0, 148.2, 153.8, 153.9, 159.4, 160.2; HRMS calcd for  $\text{C}_{31}\text{H}_{25}\text{O}_5$  [ $\text{M}+\text{H}^+$ ] 477.1702, found 477.1708.

### 2,3,5-Trisubstituted benzo[*b*]furan 14{92}

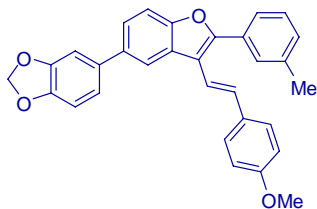

The product was obtained as a pale yellow oil that solidified upon standing to a yellow solid (76% yield):  $^1\text{H}$  NMR (400 MHz,  $\text{CDCl}_3$ )  $\delta$  2.45 (s, 3H), 3.84 (s, 3H), 6.01 (s, 2H), 6.88-6.95 (m, 3H), 7.07-7.13 (m, 2H), 7.19-7.32 (m, 3H), 7.36-7.42 (t,  $J = 7.6$  Hz, 1H), 7.44-7.57 (m, 4H), 7.62 (d,  $J = 7.8$  Hz, 1H), 7.66 (s, 1H), 8.00 (d,  $J = 1.4$  Hz, 1H);  $^{13}\text{C}$  NMR (100 MHz,  $\text{CDCl}_3$ )  $\delta$  21.8, 55.6, 101.4, 108.4, 108.8, 111.5, 114.4 ( $\times 2$ ), 114.9, 118.0, 119.4, 121.2, 124.4, 125.4, 127.7 ( $\times 2$ ), 128.5, 128.6, 128.8, 129.7, 130.8, 130.9, 131.0, 136.5, 136.7, 138.7, 147.0, 148.2, 153.8, 154.0, 159.5; HRMS calcd for  $\text{C}_{31}\text{H}_{25}\text{O}_4$  [ $\text{M}+\text{H}^+$ ] 461.1753, found 461.1759.

### 2,3,5-Trisubstituted benzo[*b*]furan 14{95}

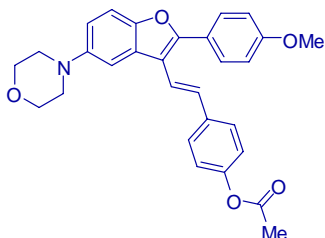

The product was obtained as a yellow oil that solidified upon standing to a yellow solid (64% yield):  $^1\text{H}$  NMR (400 MHz,  $\text{CDCl}_3$ )  $\delta$  2.32 (s, 3H), 3.19 (t,  $J = 4.7$  Hz, 4H), 3.93 (t,  $J = 4.7$  Hz, 4H), 2.88 (s, 3H), 6.98-7.04 (m, 1H), 7.02 (d,  $J = 8.9$  Hz, 2H), 7.11 (d,  $J = 8.6$  Hz, 2H), 7.10 (s, 1H), 7.12 (s, 1H), 7.38 (d,  $J$

= 2.3 Hz, 1H), 7.43 (d,  $J = 8.9$  Hz, 1H), 7.54 (d,  $J = 8.6$  Hz, 2H), 7.72 (d,  $J = 8.9$  Hz, 2H);  $^{13}\text{C}$  NMR (100 MHz,  $\text{CDCl}_3$ )  $\delta$  21.4, 51.8 ( $\times 2$ ), 55.6, 67.3 ( $\times 2$ ), 108.1, 111.6, 113.4, 114.5 ( $\times 2$ ), 115.7, 120.9, 122.1 ( $\times 2$ ), 123.6, 127.3 ( $\times 2$ ), 128.7, 129.5 ( $\times 2$ ), 129.6, 136.0, 148.6, 149.9, 150.1, 154.5, 160.2, 169.8; HRMS calcd for  $\text{C}_{29}\text{H}_{28}\text{NO}_5$  [ $\text{M}+\text{H}^+$ ] 470.1967, found 470.1978.

### 2,3,5-Trisubstituted benzo[*b*]furan 14{97}

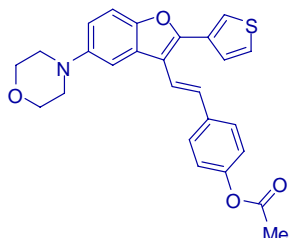

The product was obtained as a yellow oil that solidified upon standing to a yellow solid (64% yield):  $^1\text{H}$  NMR (400 MHz,  $\text{CDCl}_3$ )  $\delta$  2.33 (s, 3H), 3.19 (t,  $J = 4.7$  Hz, 4H), 3.93 (t,  $J = 4.7$  Hz, 4H), 7.03 (dd,  $J = 2.3, 8.9$  Hz, 1H), 7.13 (d,  $J = 8.5$  Hz, 2H), 7.16-7.34 (m, 2H), 7.37 (d,  $J = 2.1$  Hz, 1H), 7.43 (d,  $J = 8.9$  Hz, 1H), 7.44-7.47 (m, 1H), 7.54-7.58 (m, 1H), 7.56 (d,  $J = 8.5$  Hz, 2H), 7.70 (d,  $J = 1.8$  Hz, 1H);  $^{13}\text{C}$  NMR (100 MHz,  $\text{CDCl}_3$ )  $\delta$  21.4, 51.8 ( $\times 2$ ), 67.3 ( $\times 2$ ), 108.1, 111.7, 114.1, 115.5, 116.1, 120.2, 122.2 ( $\times 2$ ), 124.2, 126.6, 126.7, 127.4 ( $\times 2$ ), 128.4, 130.2, 132.1, 135.8, 148.7, 149.8, 150.2, 169.8; HRMS calcd for  $\text{C}_{26}\text{H}_{24}\text{NO}_4\text{S}$  [ $\text{M}+\text{H}^+$ ] 446.1426, found 446.1435.

### General procedure for carboalkoxylation to prepare 14{99-121}

A mixture of 3-iodobenzofuran **9** (0.1 mmol), 5 mol % dppf, 3 mol %  $\text{Pd}(\text{OAc})_2$ , and TEA (2.0 equiv) in MeOH (1.0 mL) and DMF (1.0 mL) was flushed with an atmosphere of carbon monoxide. The solution was stirred at room temperature and then heated to 70 °C until TLC revealed complete conversion of the starting material. The solution was allowed to cool and diluted with EtOAc. The separated organic layer was washed with water and brine; dried over  $\text{MgSO}_4$ ; and concentrated *in vacuo*. The crude product was purified by either column chromatography or preparative HPLC to afford the corresponding product.

### 2,3,5-Trisubstituted benzo[*b*]furan 14{106}

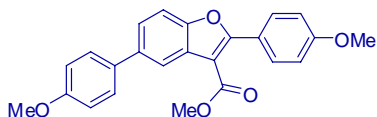

The product was obtained as a colorless oil that solidified upon standing to a white solid (71% yield):  $^1\text{H}$  NMR (400 MHz,  $\text{CDCl}_3$ )  $\delta$  3.87 (s, 3H), 3.89 (s, 3H), 3.96 (s, 3H), 7.01 (d,  $J = 8.8$  Hz, 2H), 7.02 (d,  $J = 9.0$  Hz, 2H), 7.49-7.56 (m, 2H), 7.59 (d,  $J = 8.8$  Hz, 2H), 8.05 (d,  $J = 9.0$  Hz, 2H), 8.17 (d,  $J = 1.0$  Hz, 1H);  $^{13}\text{C}$  NMR (100 MHz,  $\text{CDCl}_3$ )  $\delta$  51.8, 55.60, 55.62, 107.8, 111.2, 113.8 ( $\times 2$ ), 114.4 ( $\times 2$ ), 120.7, 122.2, 124.5, 127.9, 128.8 ( $\times 2$ ), 131.3 ( $\times 2$ ), 134.4, 137.5, 153.0, 159.2, 161.4, 161.9, 164.9; HRMS calcd for  $\text{C}_{24}\text{H}_{21}\text{O}_5$  [ $\text{M}+\text{H}^+$ ] 389.1389, found 389.1397.

### 2,3,5-Trisubstituted benzo[*b*]furan 14{109}

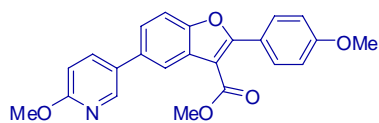

The product was obtained as a colorless oil that solidified upon standing to a white solid (76% yield):  $^1\text{H}$  NMR (400 MHz,  $\text{CDCl}_3$ )  $\delta$  3.89 (s, 3H), 3.96 (s, 3H), 4.00 (s, 3H), 6.85 (d,  $J = 8.6$  Hz, 1H), 7.01 (d,  $J = 9.0$  Hz, 2H), 7.46 (dd,  $J = 8.5, 1.9$  Hz, 1H), 7.55 (d,  $J = 8.5$  Hz, 1H), 7.85 (dd,  $J = 8.6, 2.6$  Hz, 1H), 8.06 (d,  $J = 9.0$  Hz, 2H), 8.14 (d,  $J = 1.4$  Hz, 1H), 8.45 (d,  $J = 2.0$  Hz, 1H);  $^{13}\text{C}$  NMR (100 MHz,  $\text{CDCl}_3$ )  $\delta$  51.9, 53.8, 55.6, 107.7, 111.0, 111.5, 113.8 ( $\times 2$ ), 120.8, 122.0, 124.2, 128.1, 130.7, 131.4 ( $\times 2$ ), 134.4, 138.0, 145.4, 153.2, 161.5, 162.1, 163.6, 164.7; HRMS calcd for  $\text{C}_{23}\text{H}_{20}\text{NO}_5$  [ $\text{M}+\text{H}^+$ ] 390.1341, found 390.1346.

### 2,3,5-Trisubstituted benzo[*b*]furan 14{110}

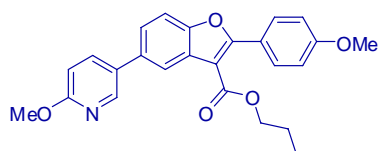

The product was obtained as a pale yellow oil that solidified upon standing to a yellow solid (69% yield):  $^1\text{H}$  NMR (400 MHz,  $\text{CDCl}_3$ )  $\delta$  1.04 (t,  $J = 7.4$  Hz, 3H), 1.57-1.58 (m, 2H), 3.89 (s, 3H), 4.01 (s, 3H), 4.34 (t,  $J = 6.7$  Hz, 2H), 6.85 (d,  $J = 8.6$  Hz, 1H), 7.02 (d,  $J = 9.0$  Hz, 2H), 7.48 (dd,  $J = 1.9, 8.5$  Hz, 1H), 7.57 (d,  $J = 8.5$  Hz, 1H), 7.85 (dd,  $J = 2.6, 8.6$  Hz, 1H), 8.06 (d,  $J = 9.0$  Hz, 2H), 8.19 (d,  $J = 1.4$  Hz, 1H), 8.44 (d,  $J = 2.0$  Hz, 1H);  $^{13}\text{C}$  NMR (100 MHz,  $\text{CDCl}_3$ )  $\delta$  10.9, 22.4, 53.8, 55.6, 66.6, 108.0, 111.0, 111.6, 113.8 ( $\times 2$ ), 115.5, 120.8, 122.1, 124.2, 128.3, 130.7, 131.4 ( $\times 2$ ), 134.3, 138.0, 145.3, 153.3, 161.5, 163.6, 164.4; HRMS calcd for  $\text{C}_{25}\text{H}_{24}\text{NO}_5$  [ $\text{M}+\text{H}^+$ ] 418.1654, found 418.1659.

### 2,3,5-Trisubstituted benzo[*b*]furan 14{115}

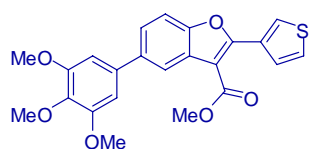

The product was obtained as a pale yellow oil that solidified upon standing to a yellow solid (80% yield):  $^1\text{H}$  NMR (400 MHz,  $\text{CDCl}_3$ )  $\delta$  3.92 (s, 3H), 3.96 (s, 6H), 4.01 (s, 3H), 6.83 (s, 2H), 7.42 (dd,  $J = 5.1, 3.1$  Hz, 1H), 7.51-7.57 (m, 2H), 7.92 (dd,  $J = 1.2, 5.1$  Hz, 1H), 8.16 (d,  $J = 1.2$  Hz, 1H), 8.62 (dd,  $J = 1.2, 3.0$  Hz, 1H);  $^{13}\text{C}$  NMR (100 MHz,  $\text{CDCl}_3$ )  $\delta$  52.0, 56.5 ( $\times 2$ ), 61.2, 105.7 ( $\times 2$ ), 107.8, 111.2, 115.5, 121.3, 125.1, 125.5, 127.5, 128.1, 129.6, 130.6, 137.9, 138.2, 152.9, 153.6 ( $\times 2$ ), 157.5, 164.7; HRMS calcd for  $\text{C}_{46}\text{H}_{44}\text{O}_{12}\text{NS}_2$  [ $2\text{M}+\text{NH}_4^+$ ] 866.2305, found 866.2322.

### 2,3,5-Trisubstituted benzo[*b*]furan 14{118}



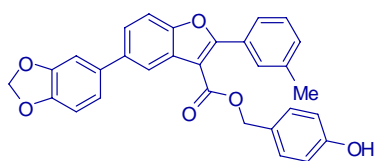

The product was obtained as a colorless oil that solidified upon standing to a white solid (71% yield):  $^1\text{H}$  NMR (400 MHz,  $\text{CDCl}_3$ )  $\delta$  2.43 (s, 3H), 4.72 (s, 2H), 6.00 (s, 2H), 6.89 (d,  $J = 7.9$  Hz, 1H), 7.07-7.14 (m, 2H), 7.22-7.26 (m, 2H), 7.30 (d,  $J = 8.1$  Hz, 1H), 7.38 (t,  $J = 8.1$  Hz, 1H), 7.44 (d,  $J = 8.5$  Hz, 2H), 7.52-7.62 (m, 2H), 7.88-7.93 (m, 2H), 8.26 (d,  $J = 1.4$  Hz, 1H);  $^{13}\text{C}$  NMR (100 MHz,  $\text{CDCl}_3$ )  $\delta$  21.7, 65.0, 101.4, 108.3, 108.8, 111.6, 121.0, 121.2, 122.1 ( $\times 2$ ), 125.1, 127.1, 127.6, 128.3, 128.4 ( $\times 2$ ), 129.4, 130.3, 131.7, 135.9, 137.9, 138.1, 138.9, 147.2, 148.3, 150.0, 153.4, 162.7, 163.2; HRMS calcd for  $\text{C}_{30}\text{H}_{23}\text{O}_6$  [ $\text{M}+\text{H}^+$ ] 479.1495, found 479.1502.

### 2,3,5-Trisubstituted benzo[b]furan 14{119}

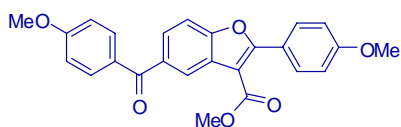

The product was obtained as a colorless oil that solidified upon standing to a pale yellow solid (74% yield):  $^1\text{H}$  NMR (400 MHz,  $\text{CDCl}_3$ )  $\delta$  3.89 (s, 3H), 3.90 (s, 3H), 3.92 (s, 3H), 7.00 (d,  $J = 8.9$  Hz, 2H), 7.03 (d,  $J = 9.0$  Hz, 2H), 7.58 (d,  $J = 8.5$  Hz, 1H), 7.79 (dd,  $J = 8.5, 1.8$  Hz, 1H), 7.88 (d,  $J = 8.9$  Hz, 2H), 8.08 (d,  $J = 9.0$  Hz, 2H), 8.45 (d,  $J = 1.4$  Hz, 2H);  $^{13}\text{C}$  NMR (100 MHz,  $\text{CDCl}_3$ )  $\delta$  52.0, 55.6, 55.7, 108.0, 111.0, 113.7 ( $\times 2$ ), 113.9 ( $\times 2$ ), 121.6, 125.2, 127.26, 127.31, 130.7 ( $\times 2$ ), 131.4 ( $\times 2$ ), 132.8, 134.7, 155.5, 161.7, 162.5, 163.3, 164.5, 195.5; HRMS calcd for  $\text{C}_{25}\text{H}_{21}\text{O}_6$  [ $\text{M}+\text{H}^+$ ] 417.1338, found 417.1347.

### 2,3,5-Trisubstituted benzo[b]furan 14{121}

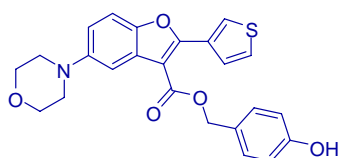

The product was obtained as a yellow oil that solidified upon standing to a yellow solid (54% yield):  $^1\text{H}$  NMR (400 MHz,  $\text{CDCl}_3$ )  $\delta$  3.18 (t,  $J = 4.7$  Hz, 4H), 3.88 (t,  $J = 4.7$  Hz, 4H), 4.74 (s, 2H), 7.05 (dd,  $J = 9.0, 2.5$  Hz, 1H), 7.27 (d,  $J = 8.5$  Hz, 2H), 7.34-7.40 (m, 1H), 7.43-7.50 (m, 3H), 7.65 (d,  $J = 2.3$  Hz, 1H), 7.91 (dd,  $J = 5.2, 1.2$  Hz, 1H), 8.63 (dd,  $J = 3.0, 1.2$  Hz, 1H);  $^{13}\text{C}$  NMR (100 MHz,  $\text{CDCl}_3$ )  $\delta$  51.2 ( $\times 2$ ), 64.9, 67.2 ( $\times 2$ ), 107.0, 109.4, 111.6, 116.5, 122.3 ( $\times 2$ ), 125.5, 127.5, 128.2, 128.4 ( $\times 2$ ), 130.0, 130.5, 139.1, 148.7, 149.3, 150.0, 158.7, 163.1; HRMS calcd for  $\text{C}_{48}\text{H}_{46}\text{N}_2\text{O}_{10}\text{S}_2$  [ $2\text{M}+\text{NH}_4^+$ ] 874.2594, found 874.2607.

# Bromoalkyne 7{5}

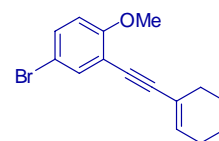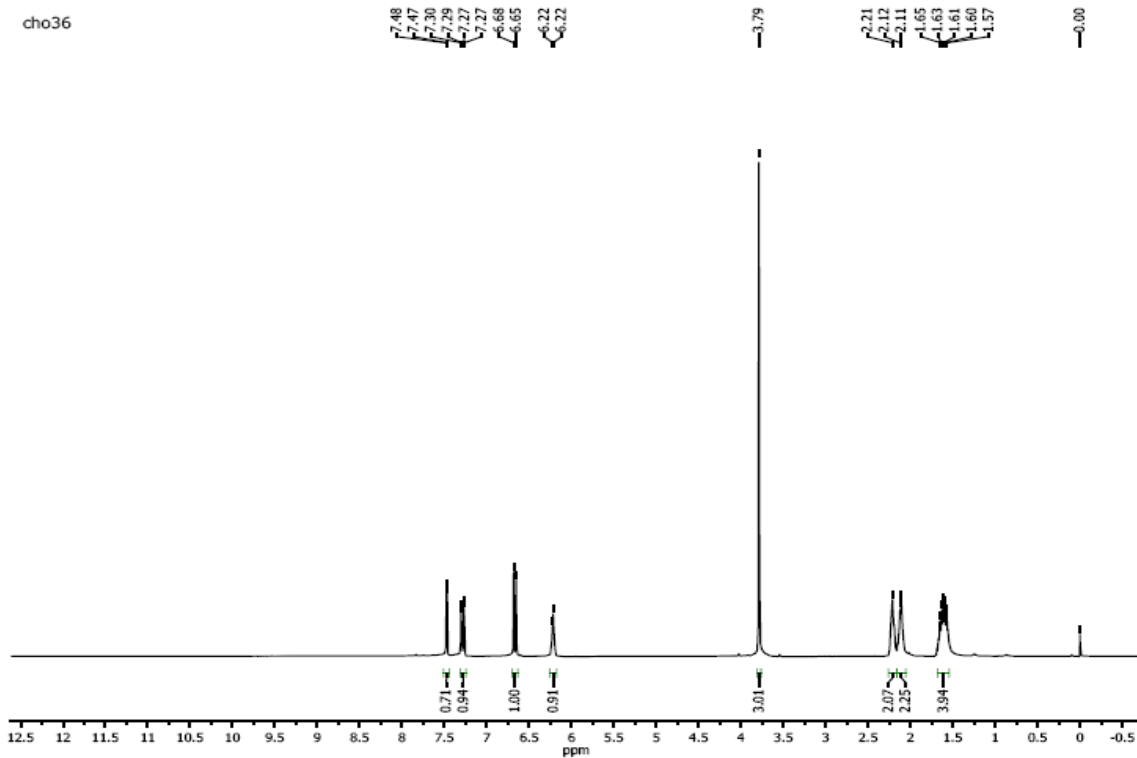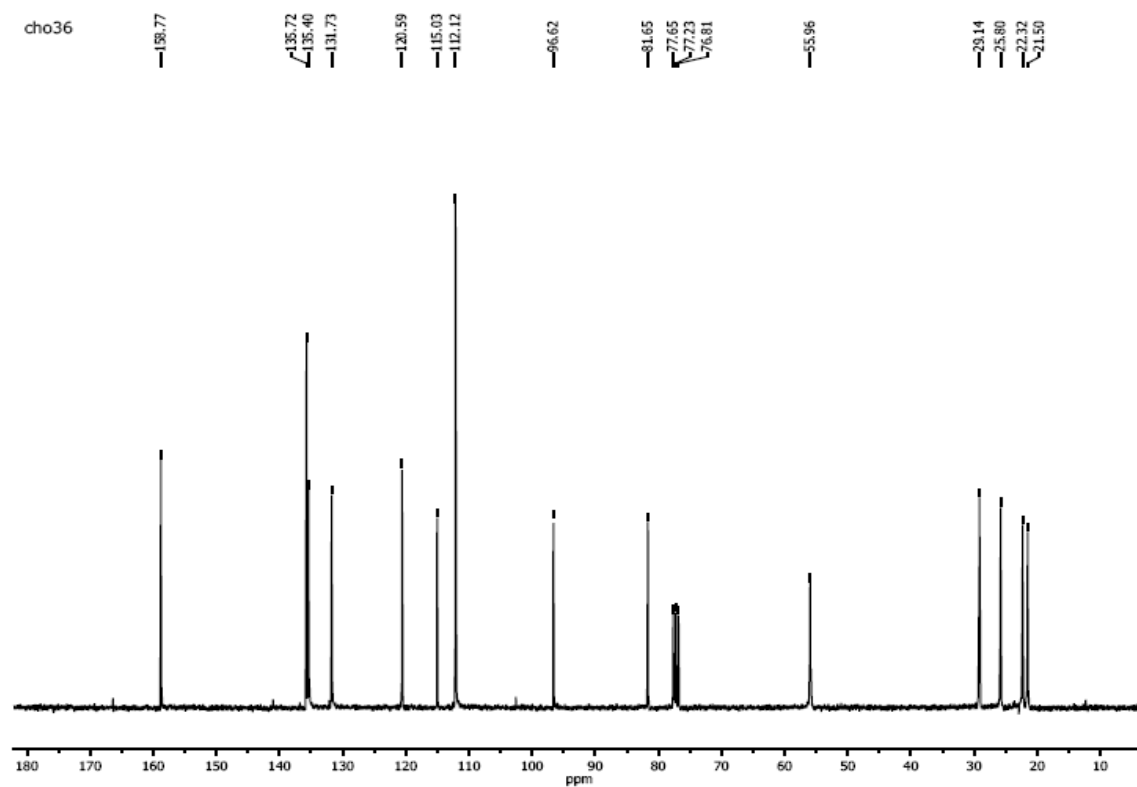

**Bromoalkyne 7{6}**

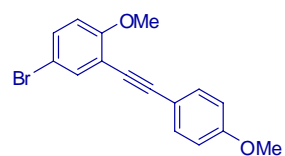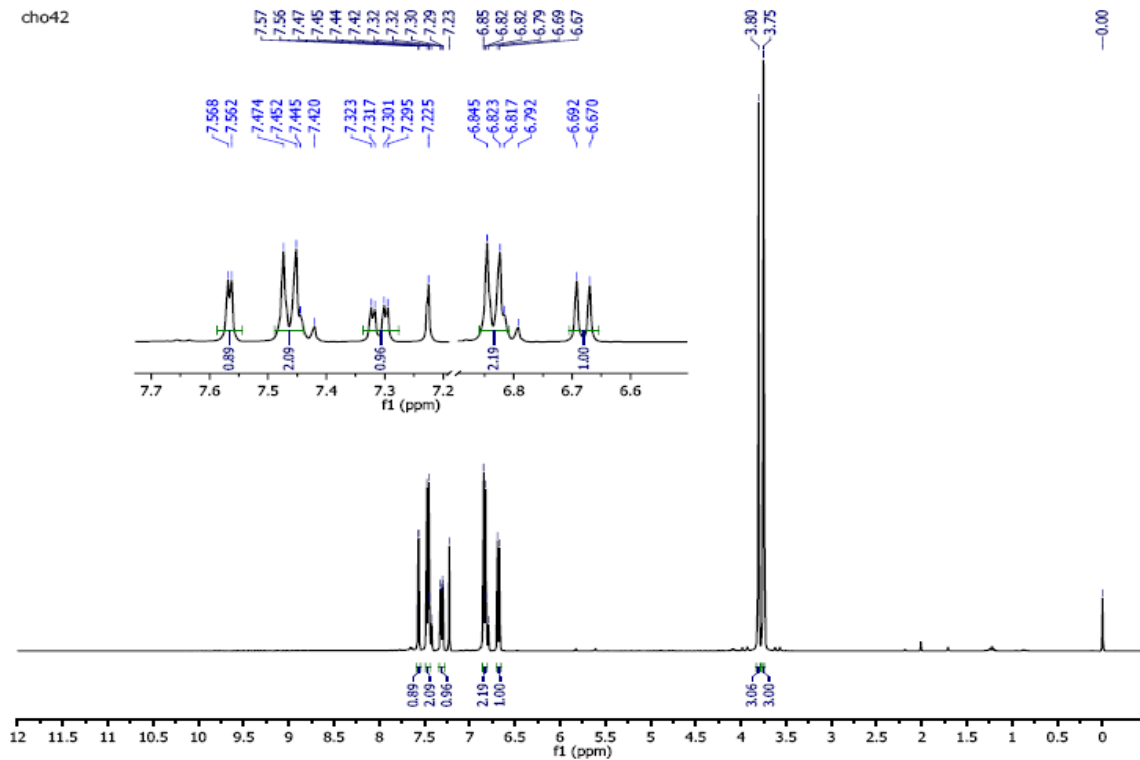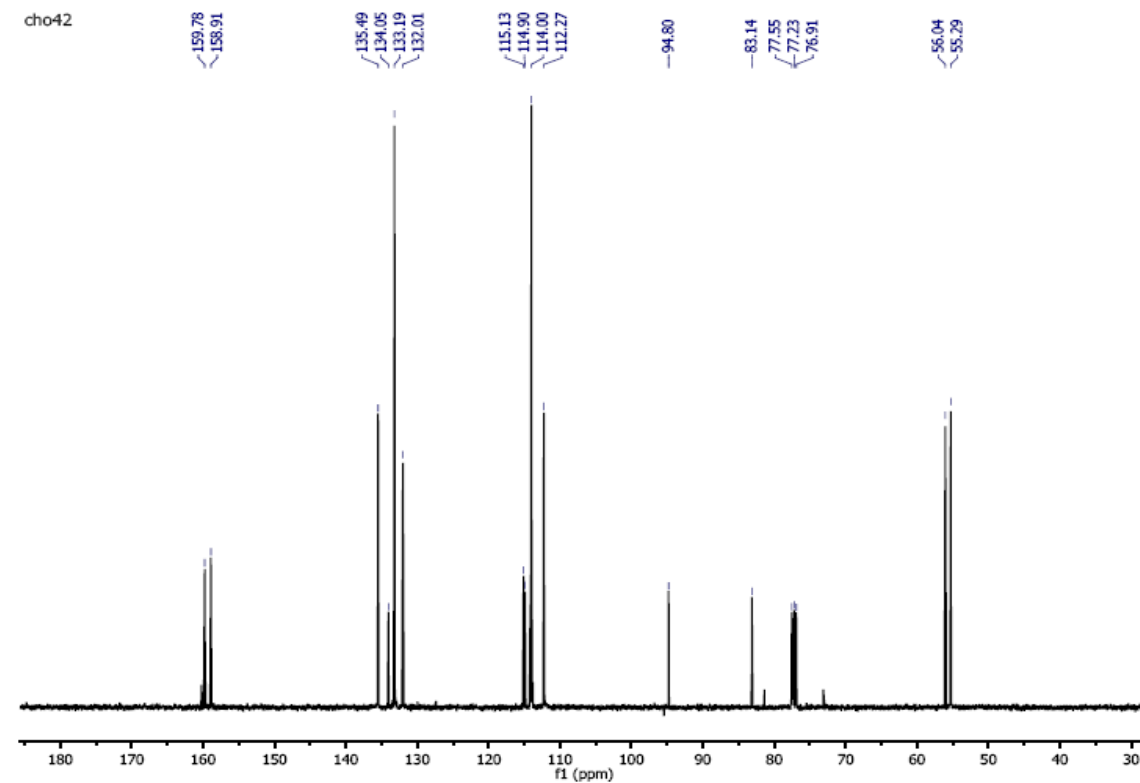

Bromoalkyne 7{7}

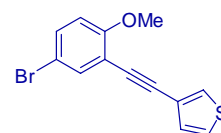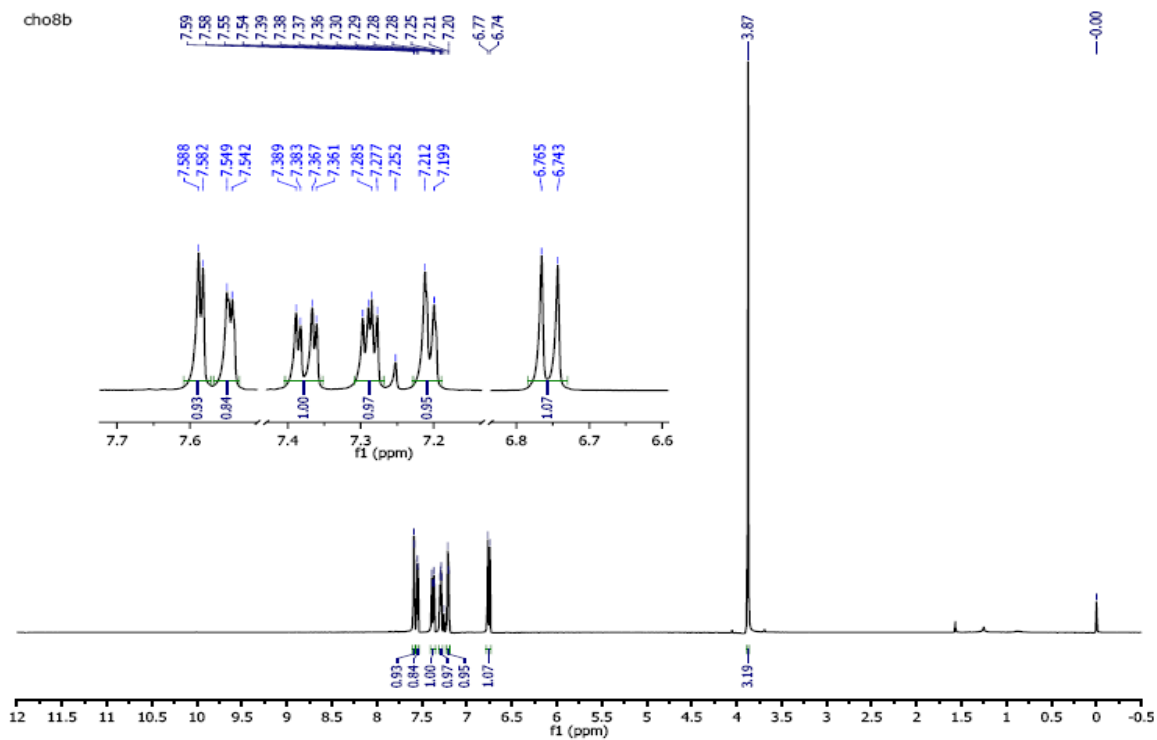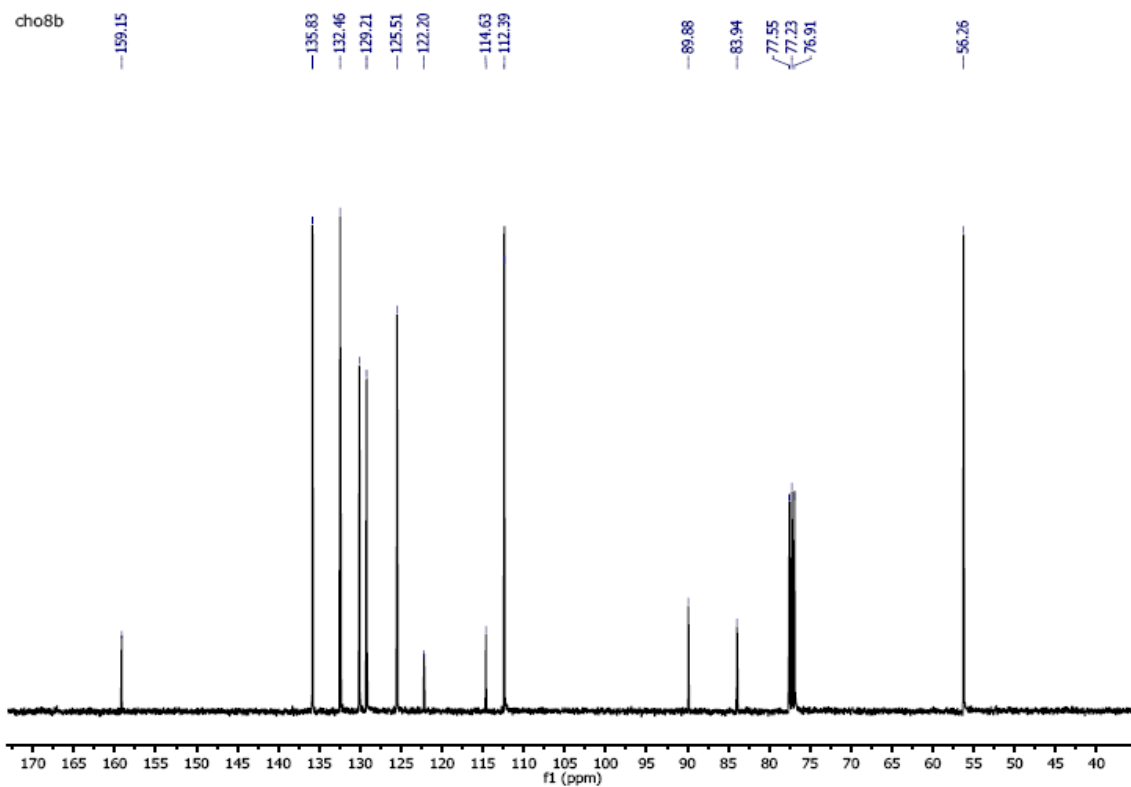

Bromoalkyne 7{8}

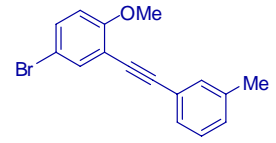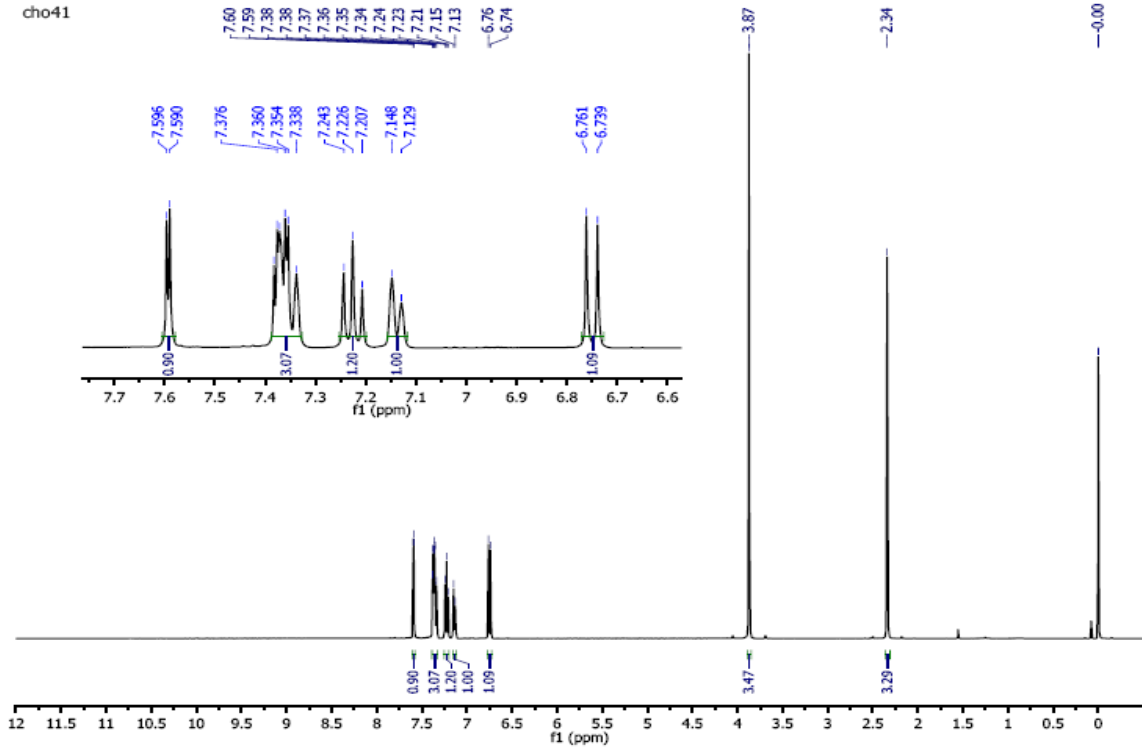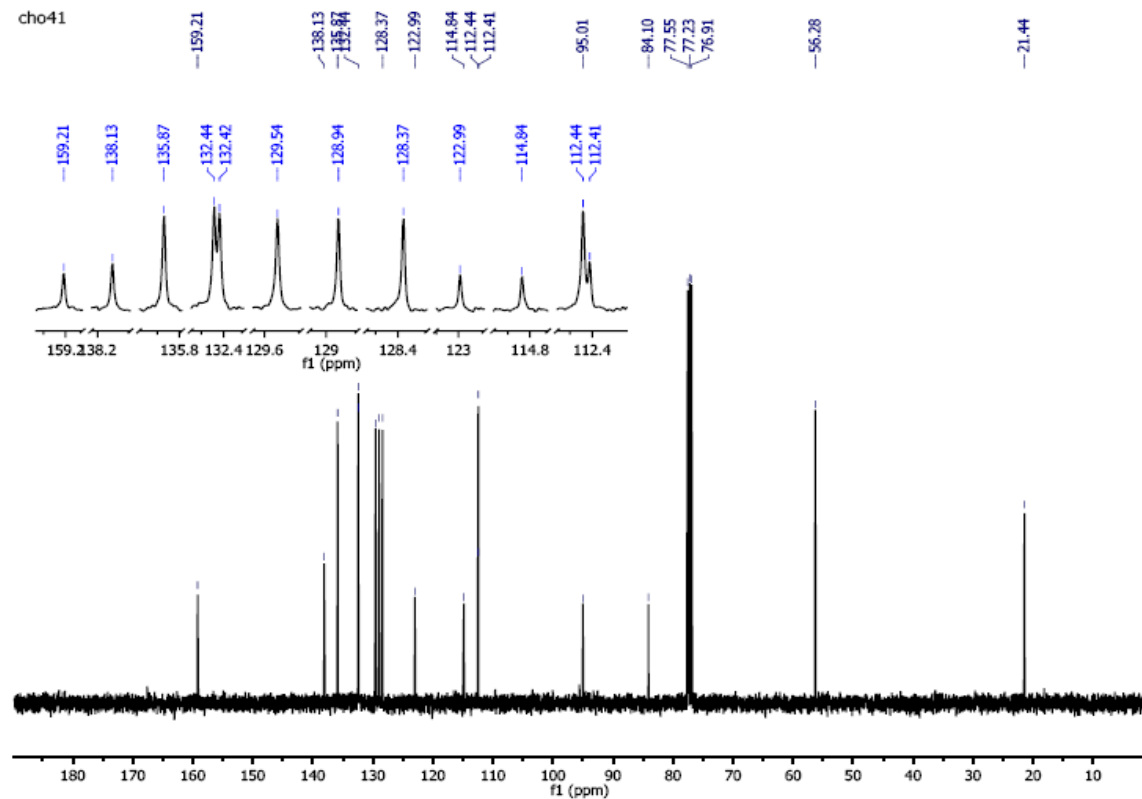

Alkyne 8{I}

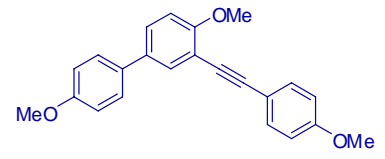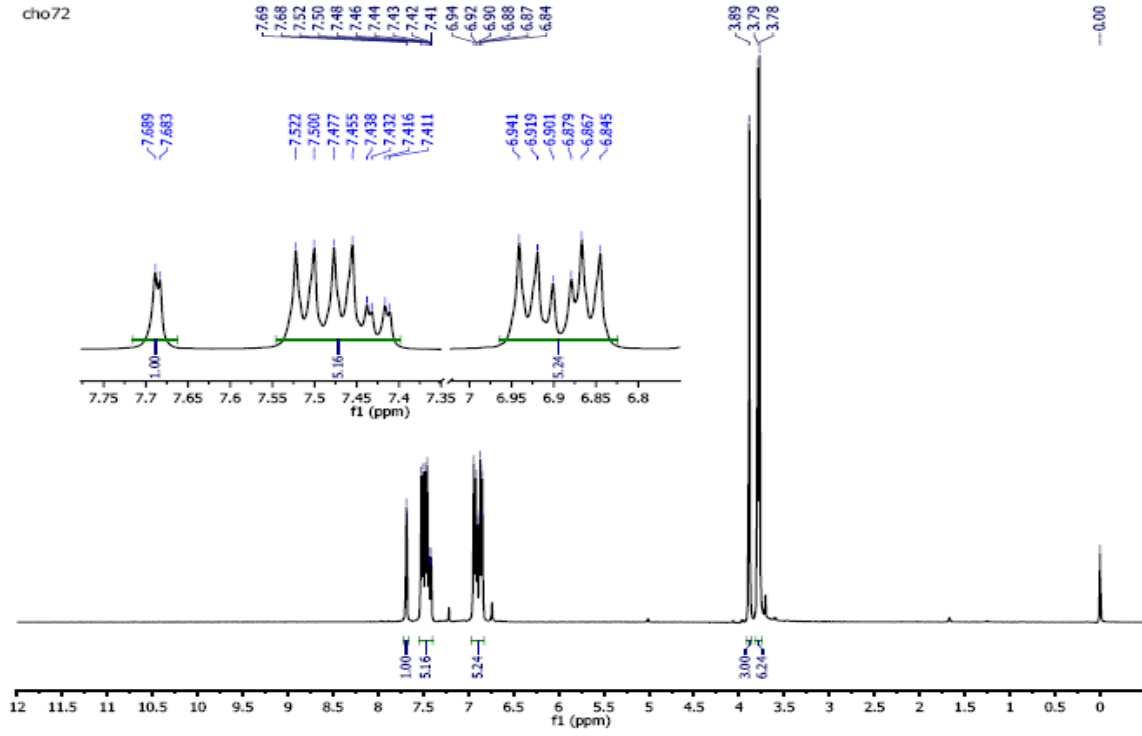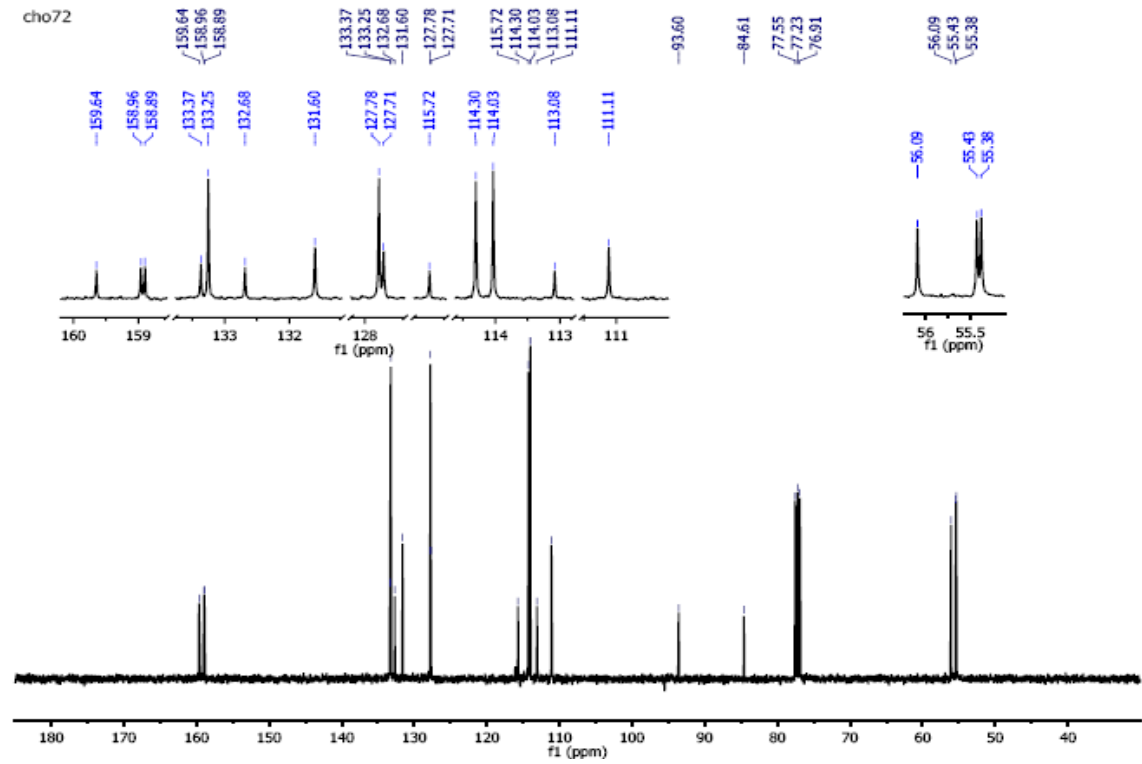

Alkyne 8{2}

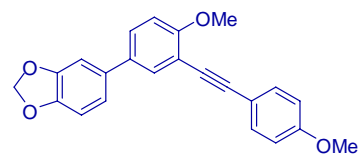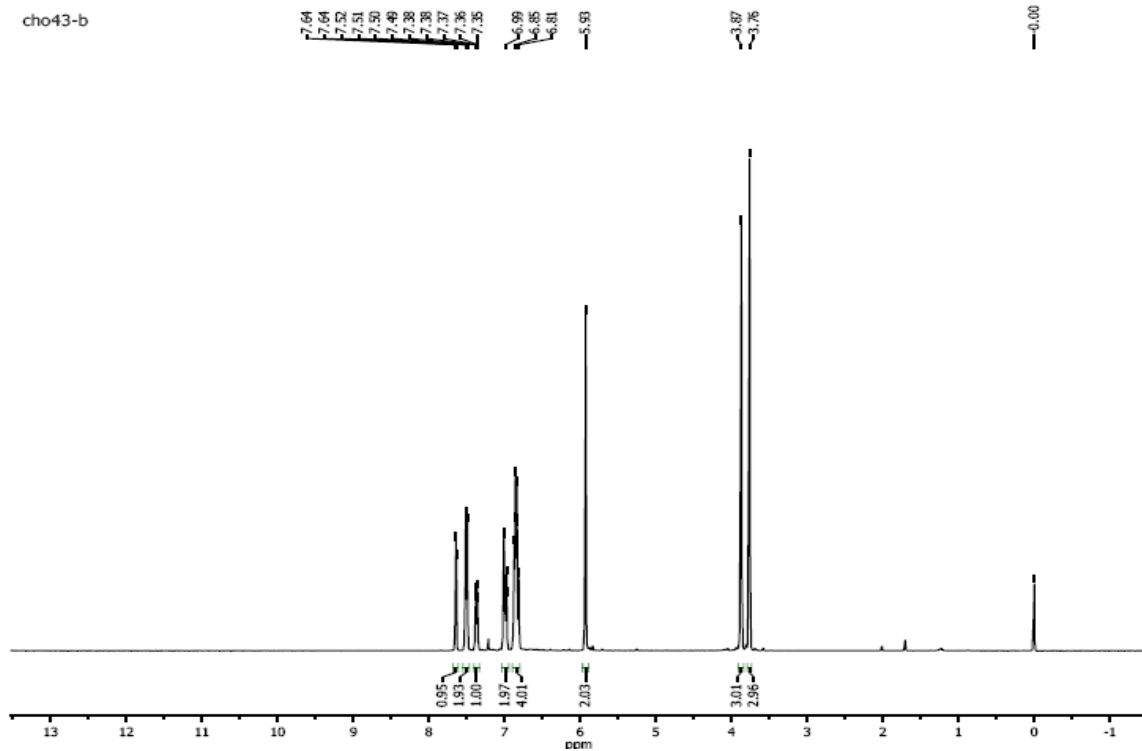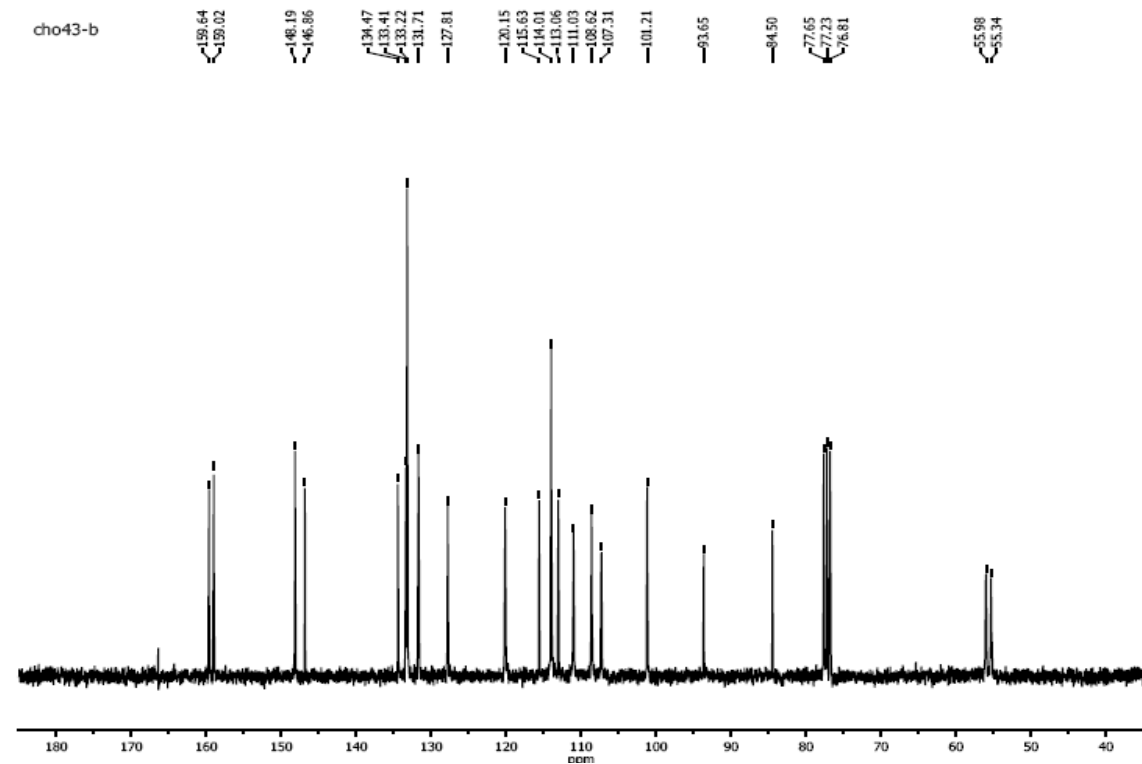

Alkyne 8{3}

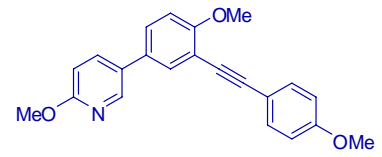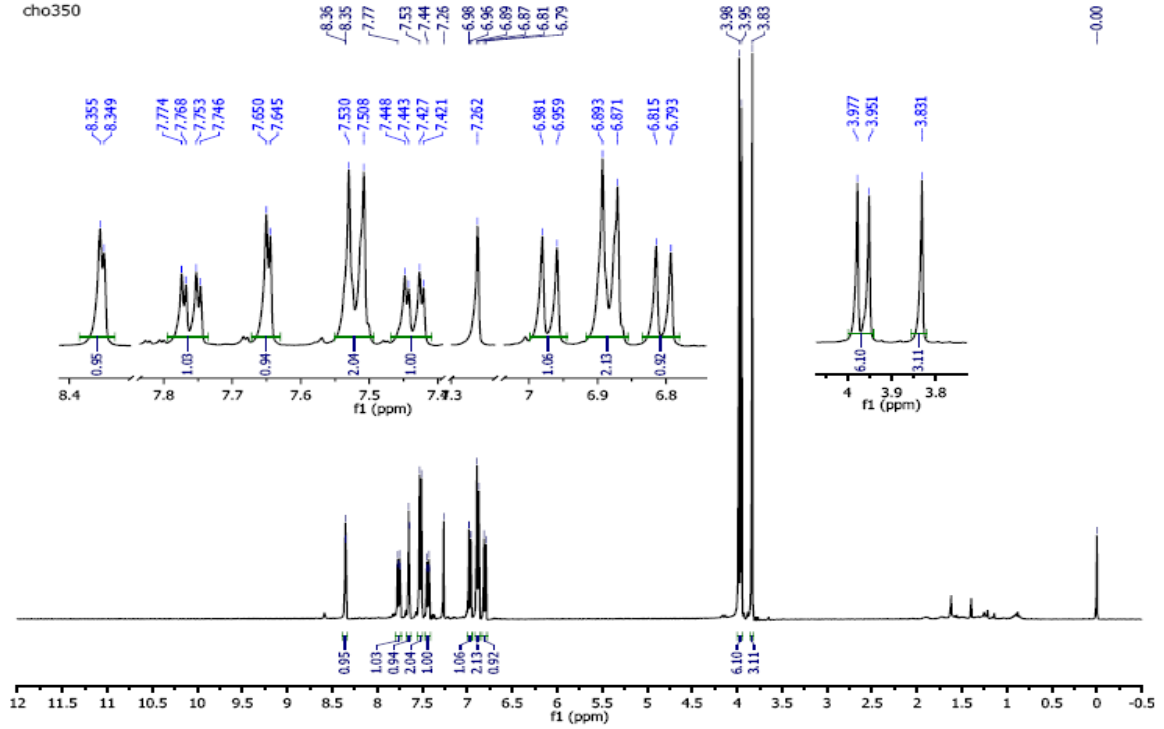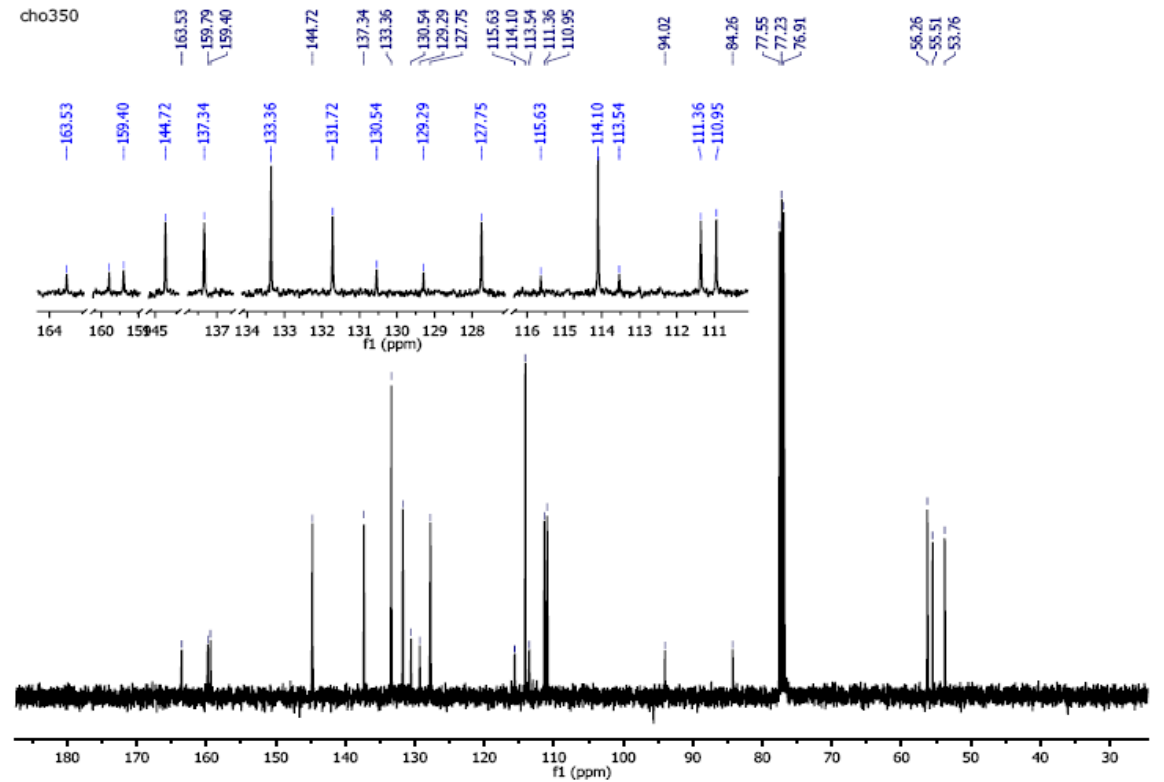



Alkyne 8{4}

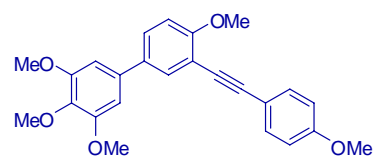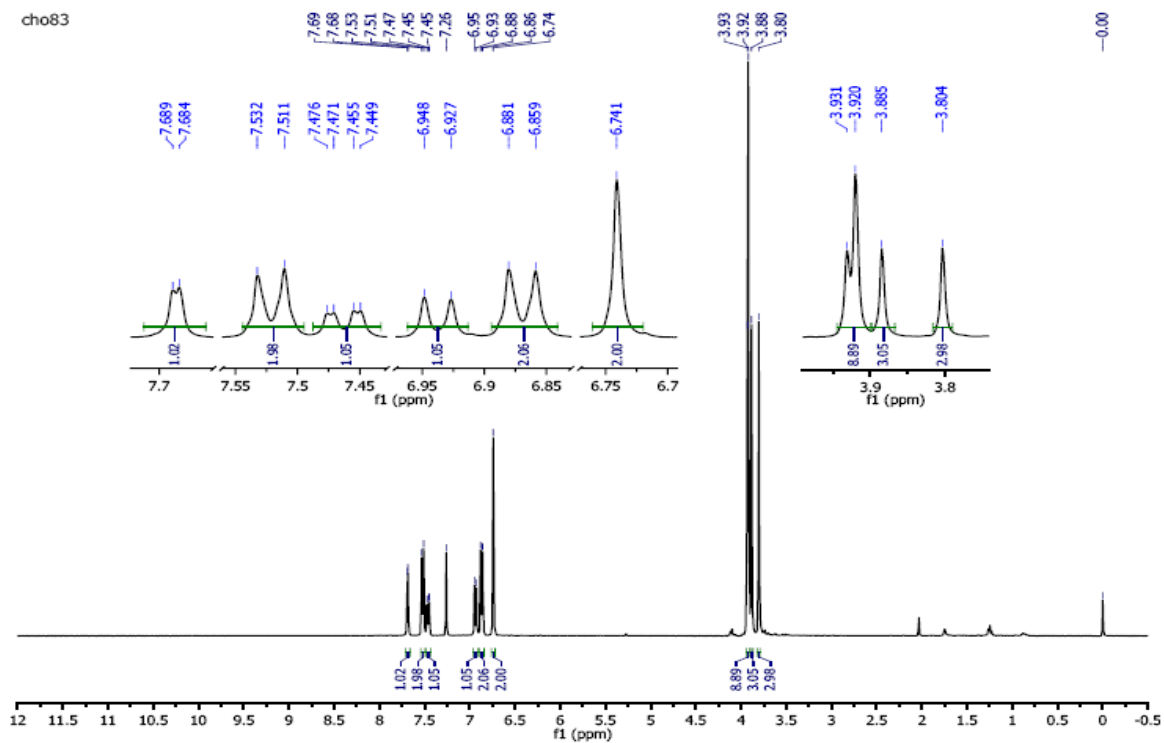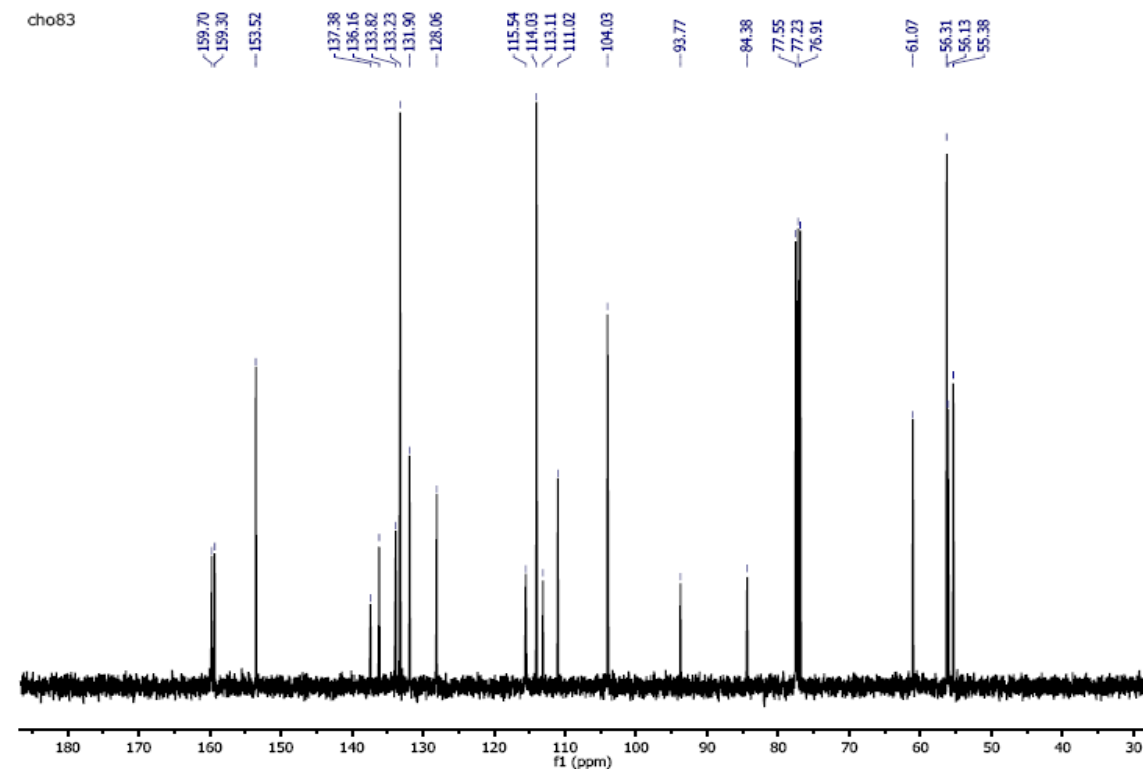

Alkyne 8{5}

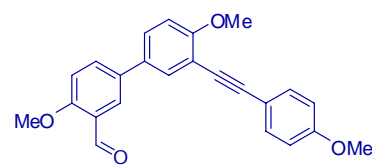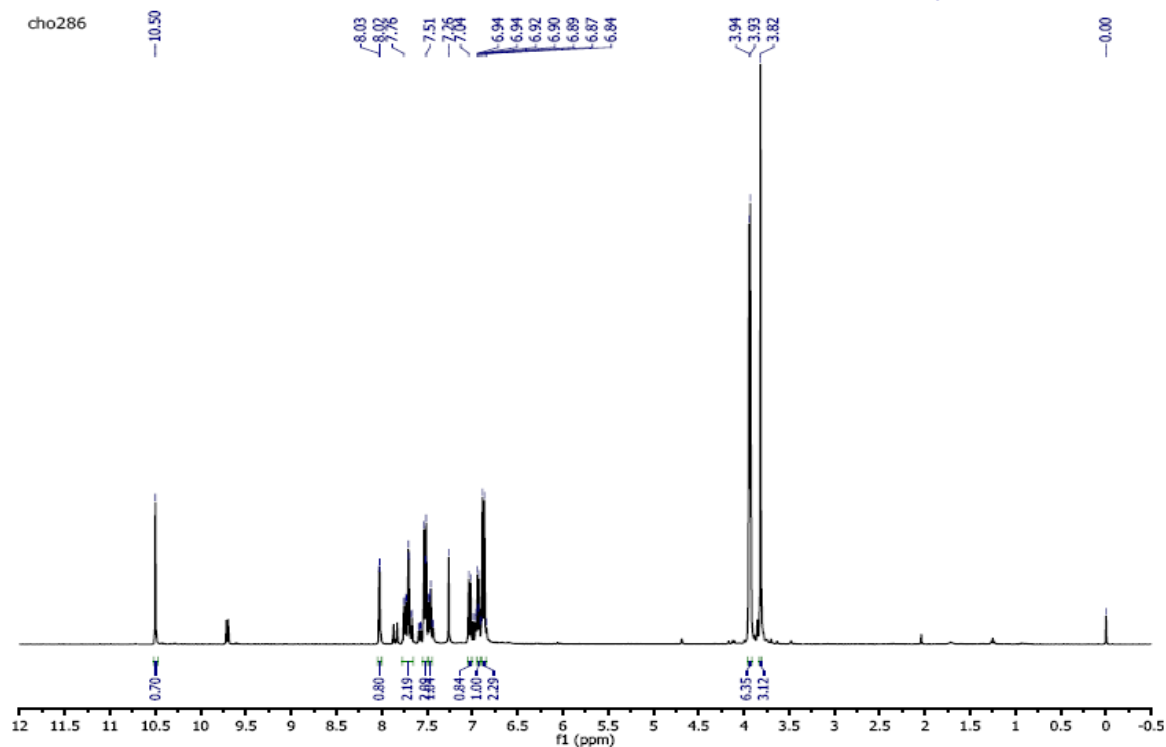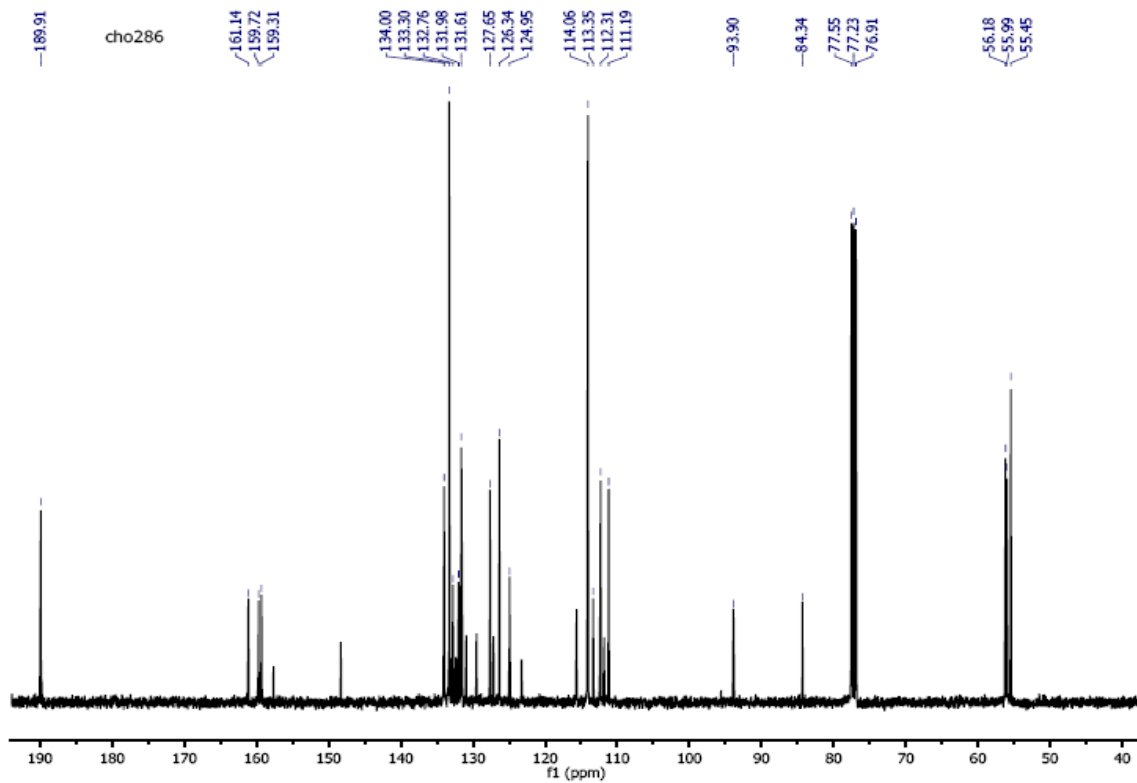

Alkyne 8{6}

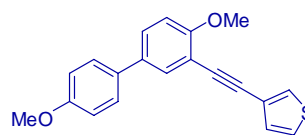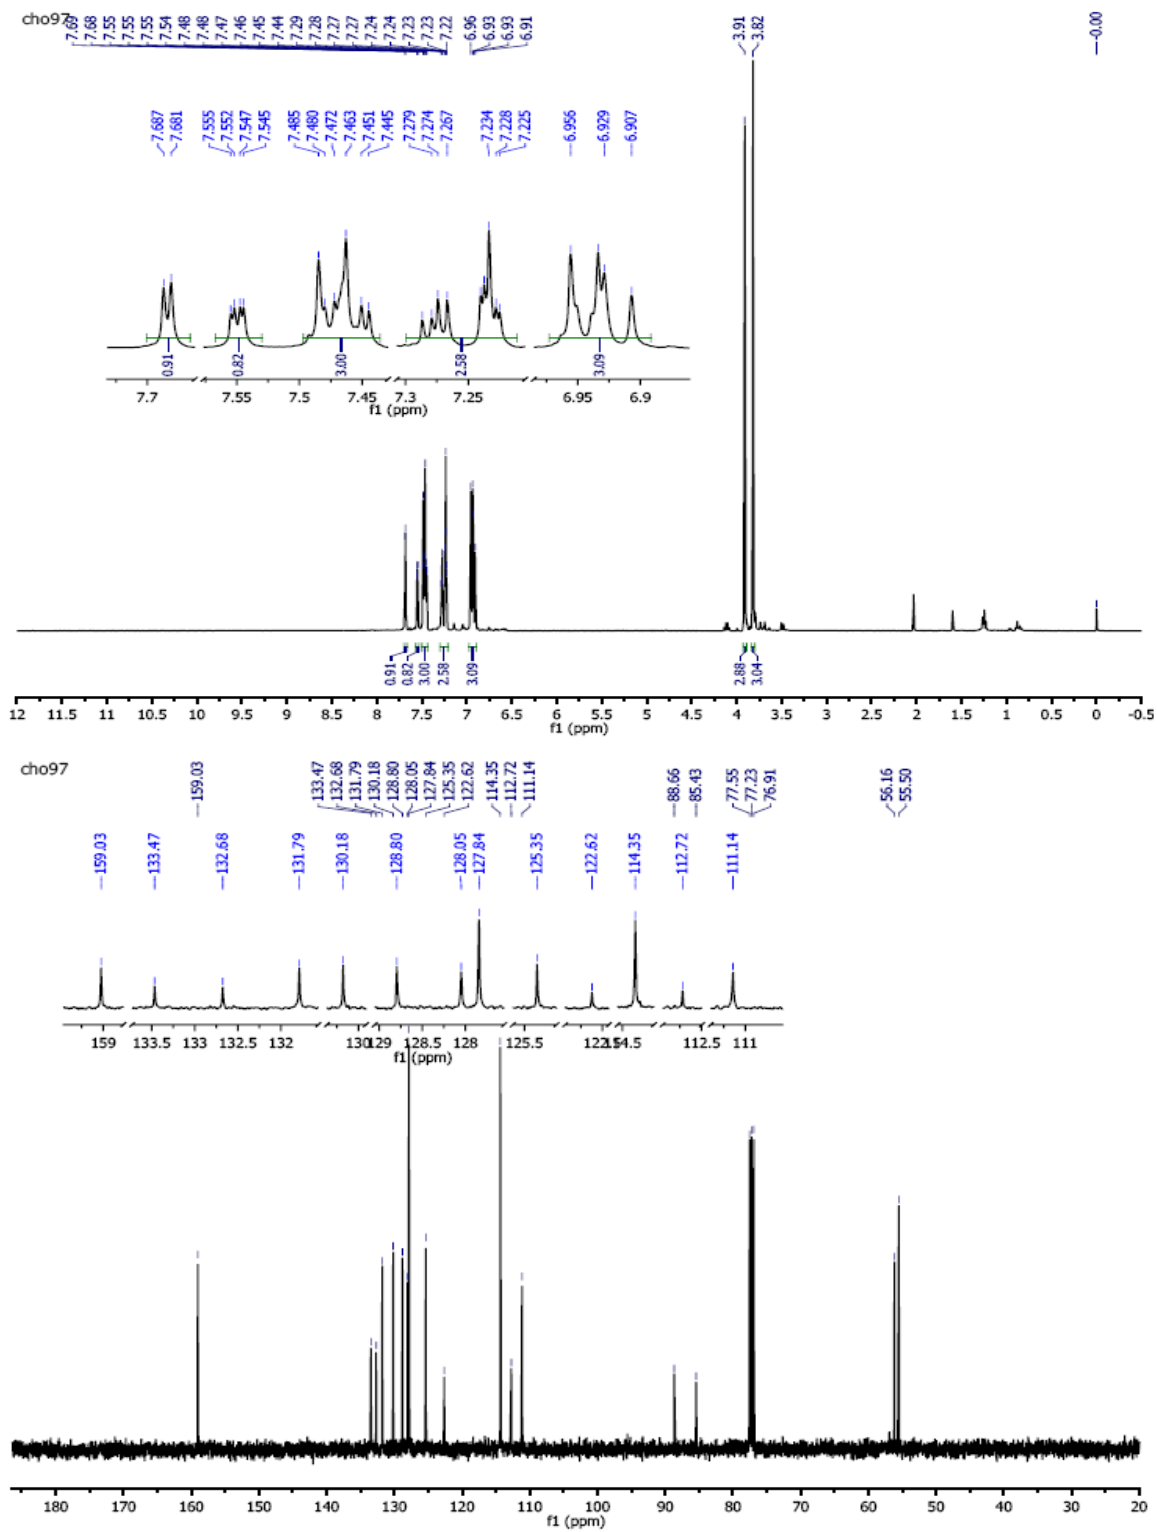

Alkyne 8{7}

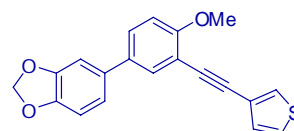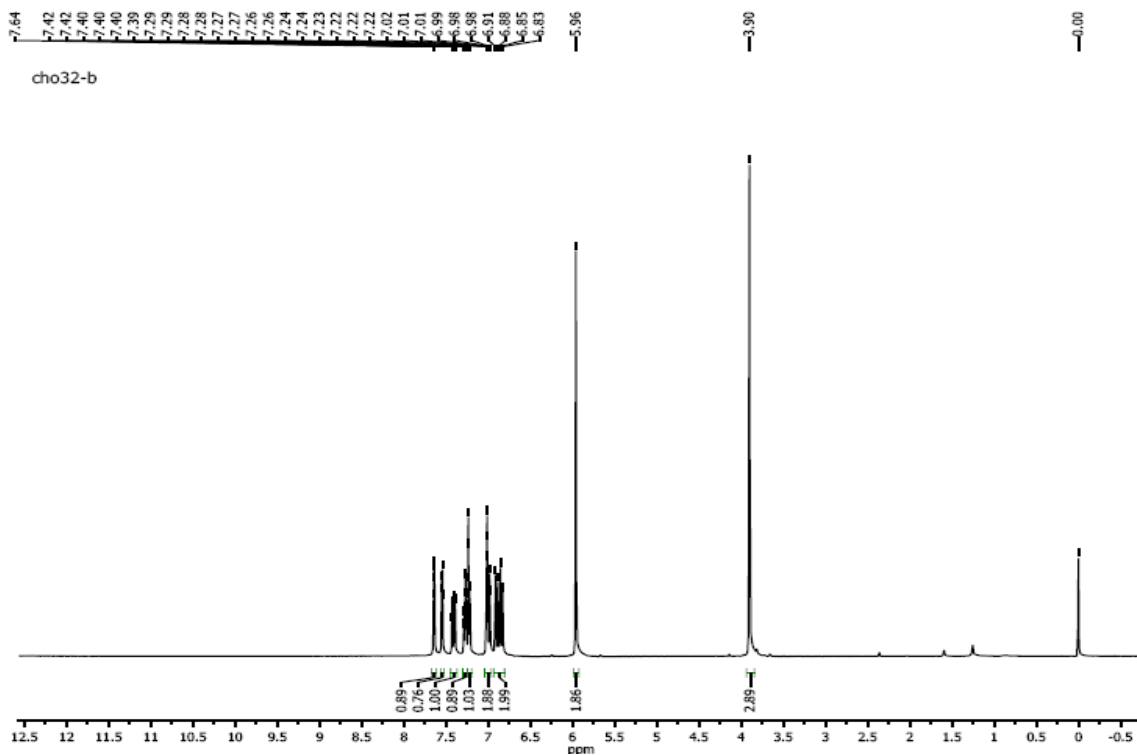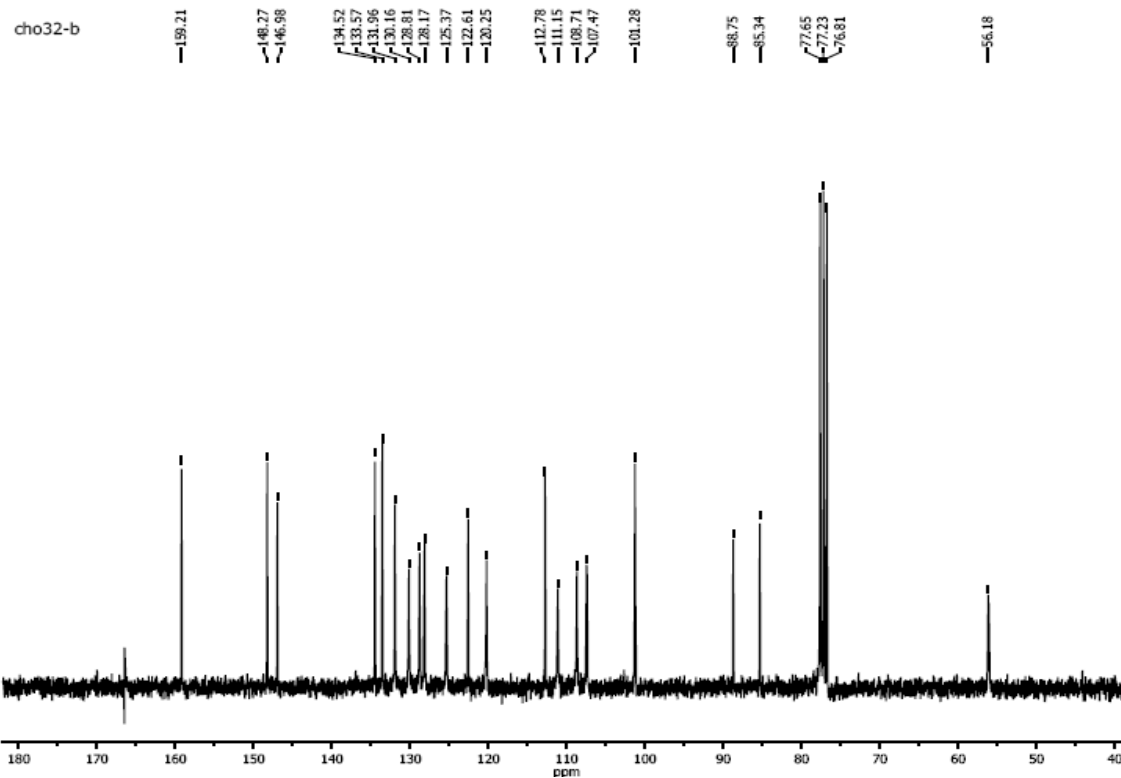

Alkyne 8{8}

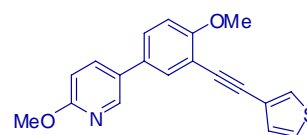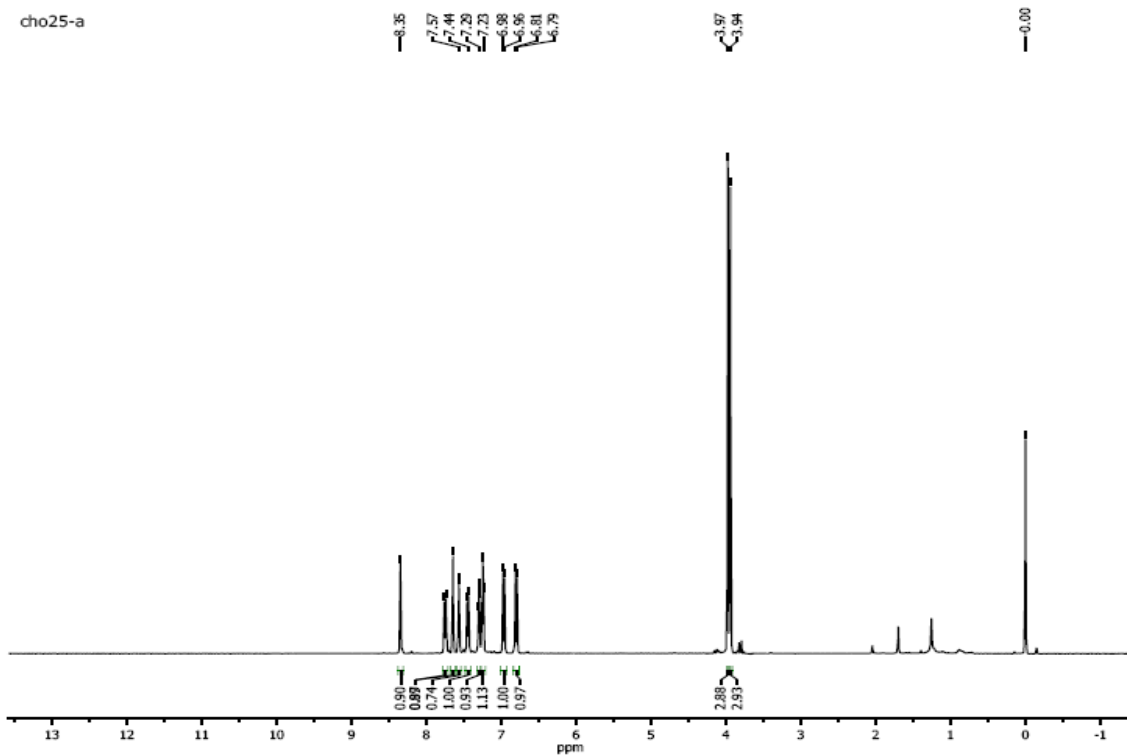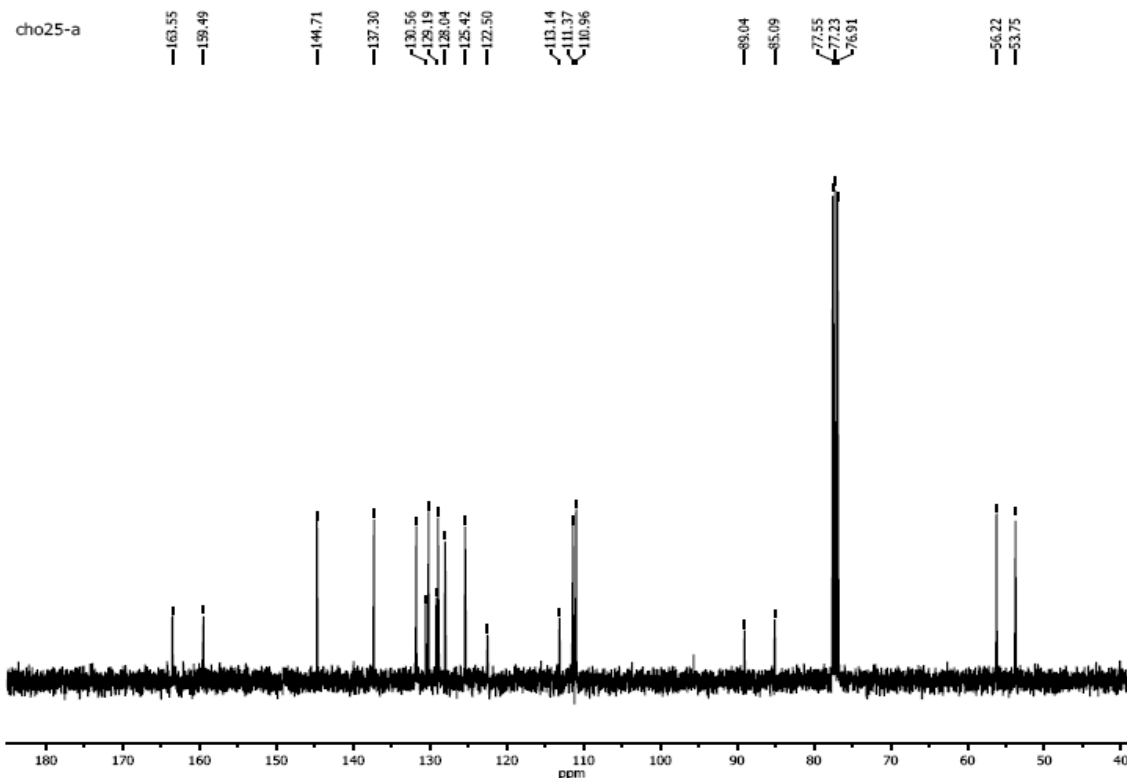

Alkyne 8{9}

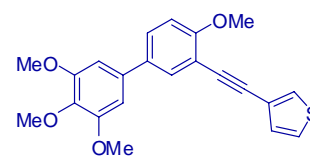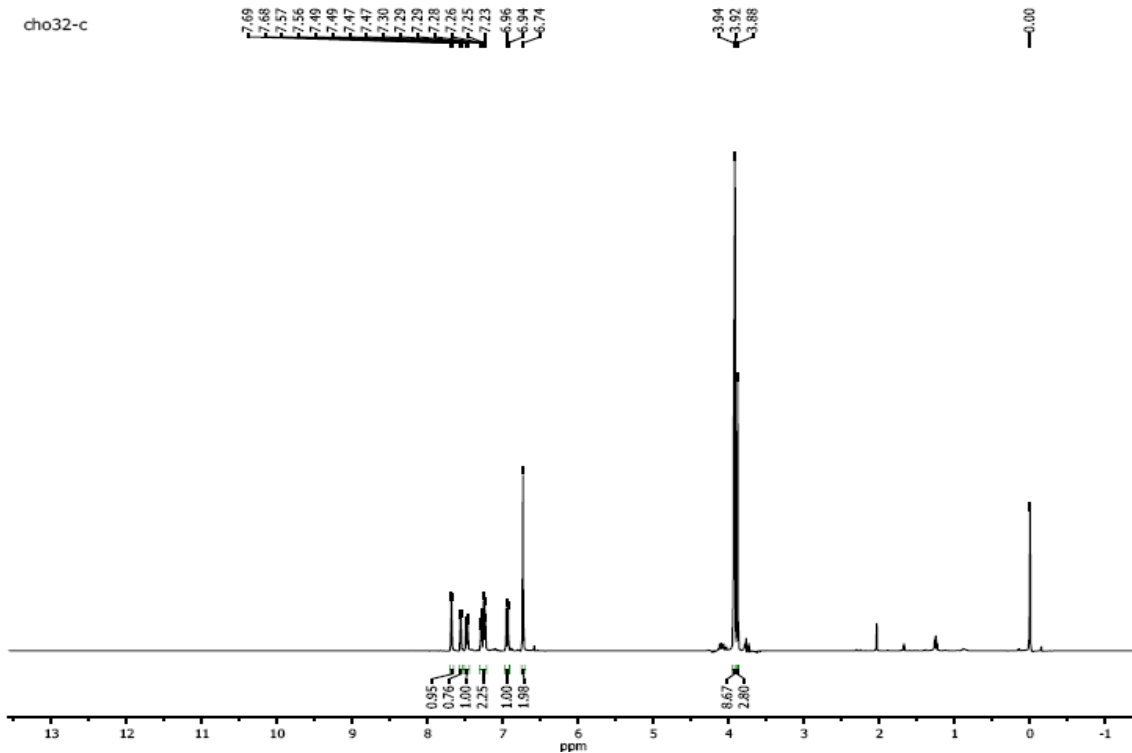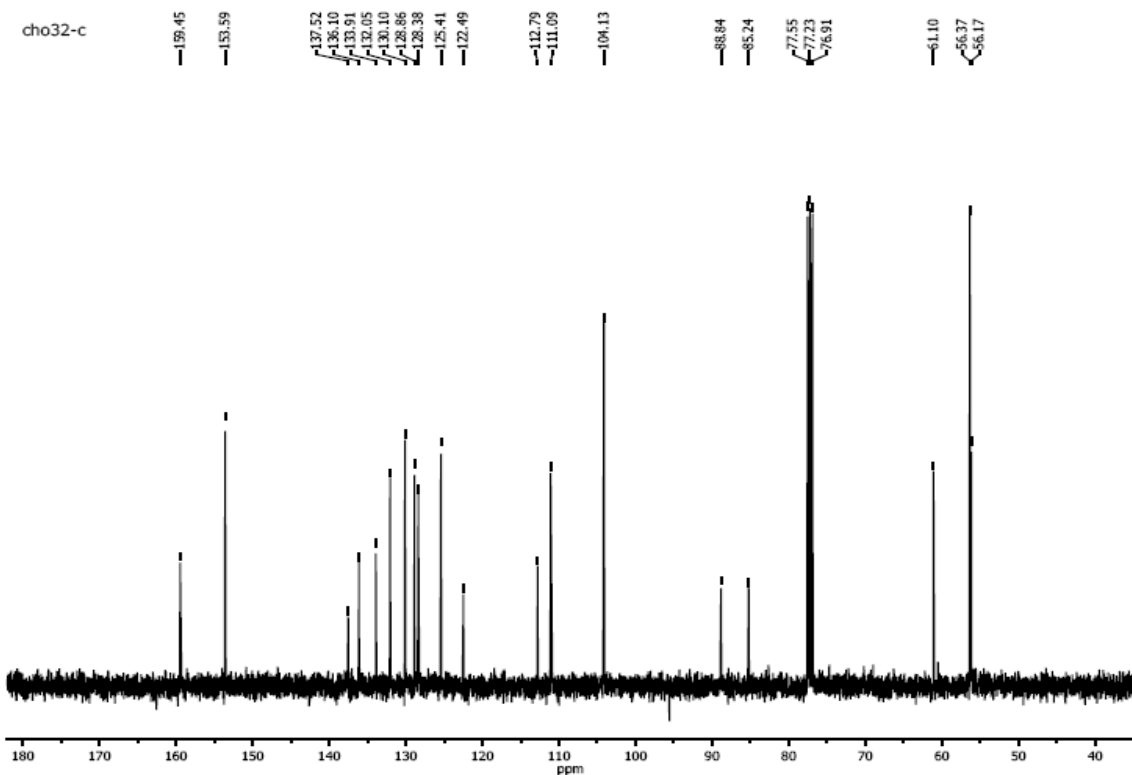

Alkyne 8{10}

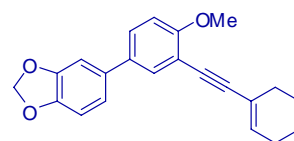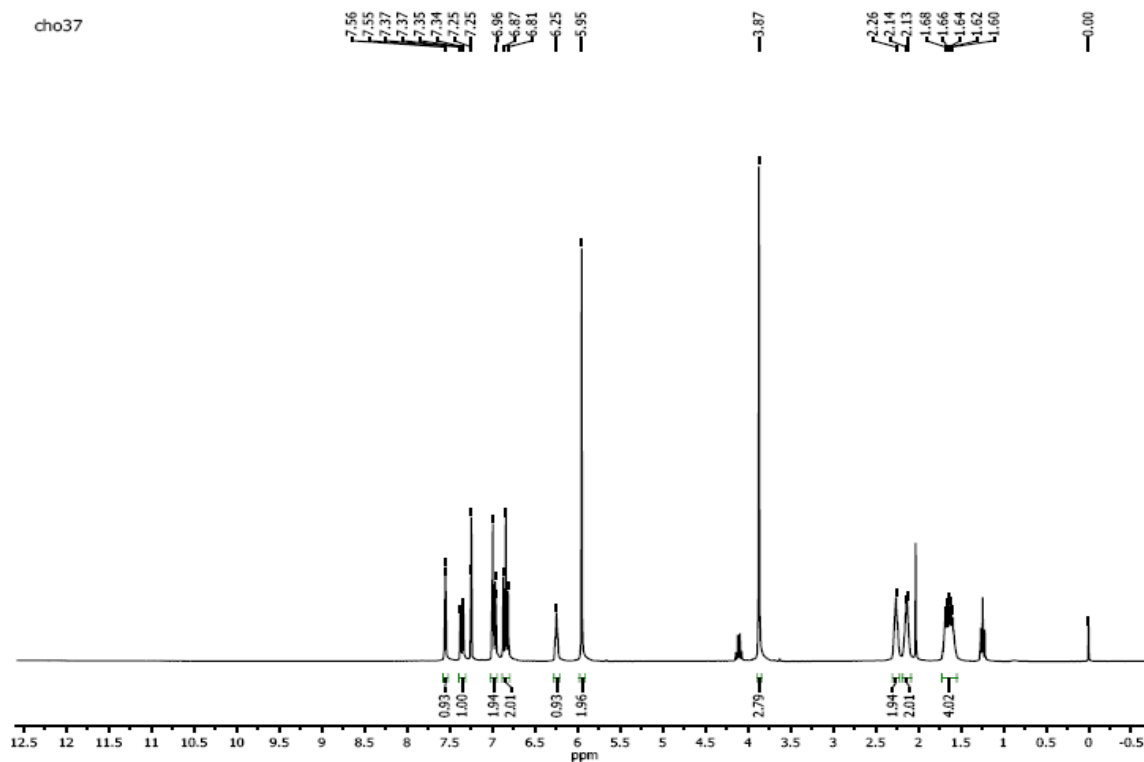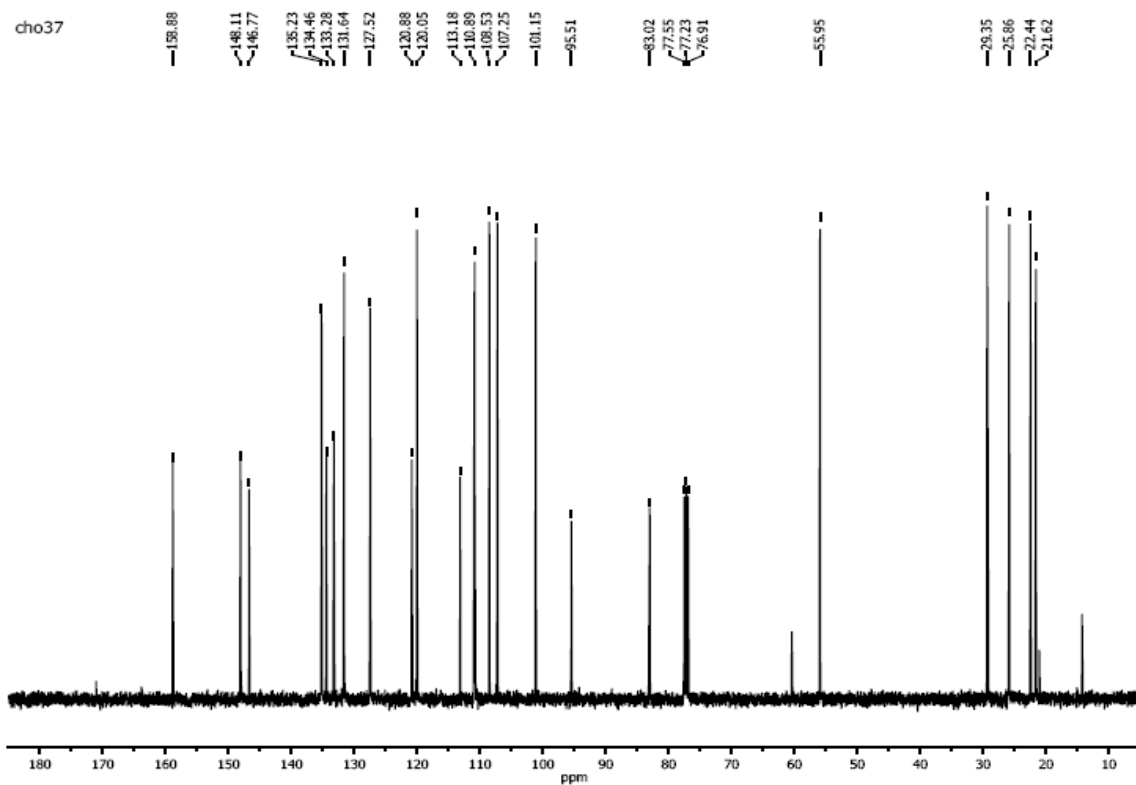

Alkyne 8{11}

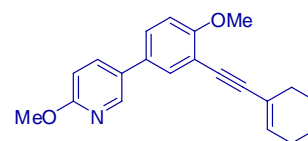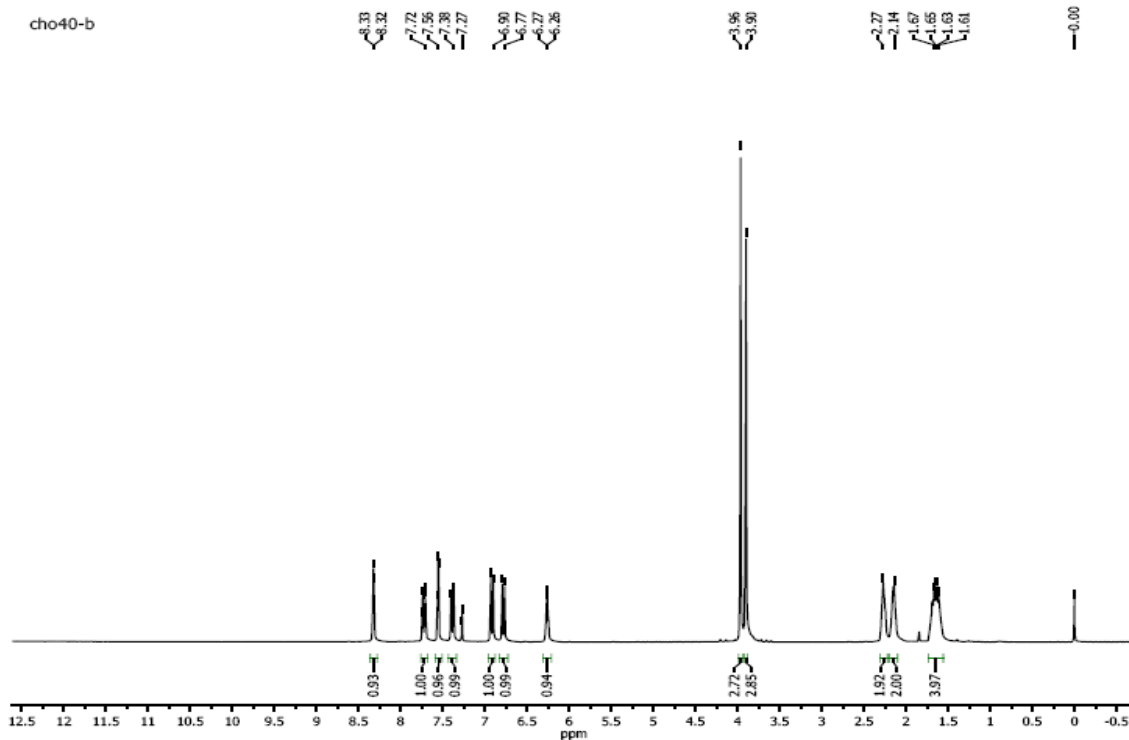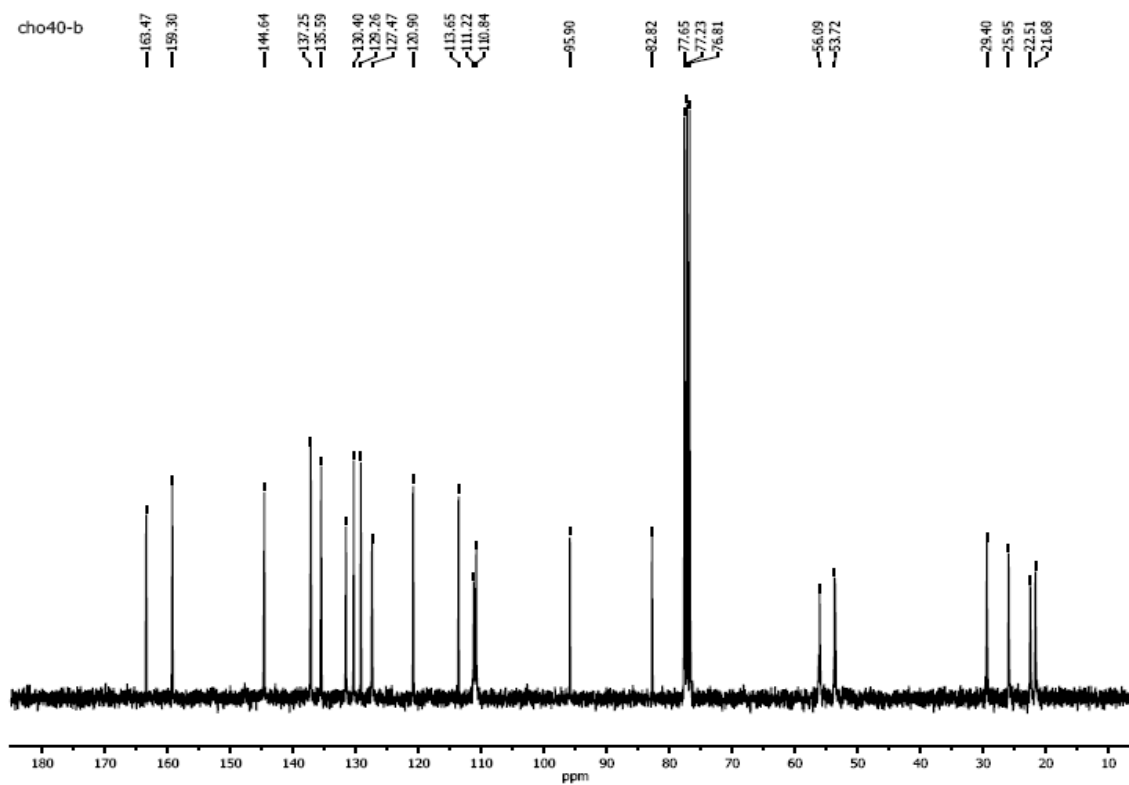



Alkyne 8{12}

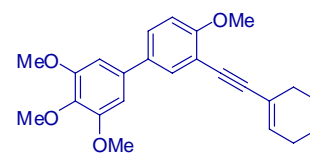

cho40-a

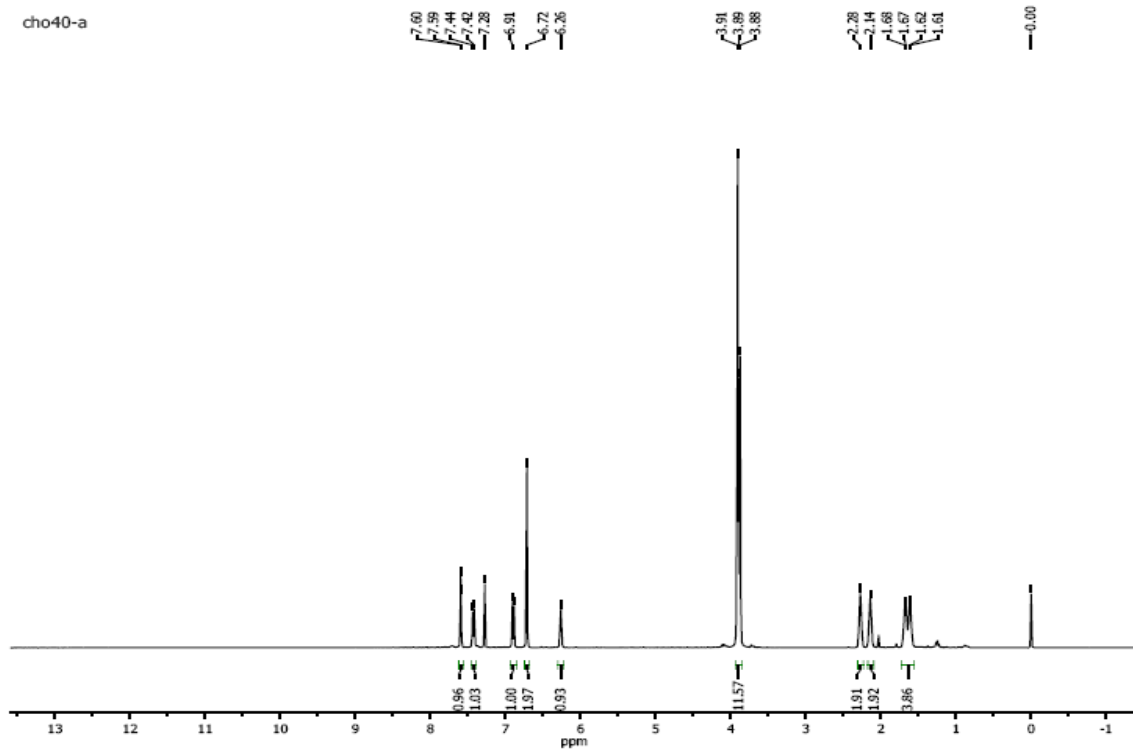

cho40-a

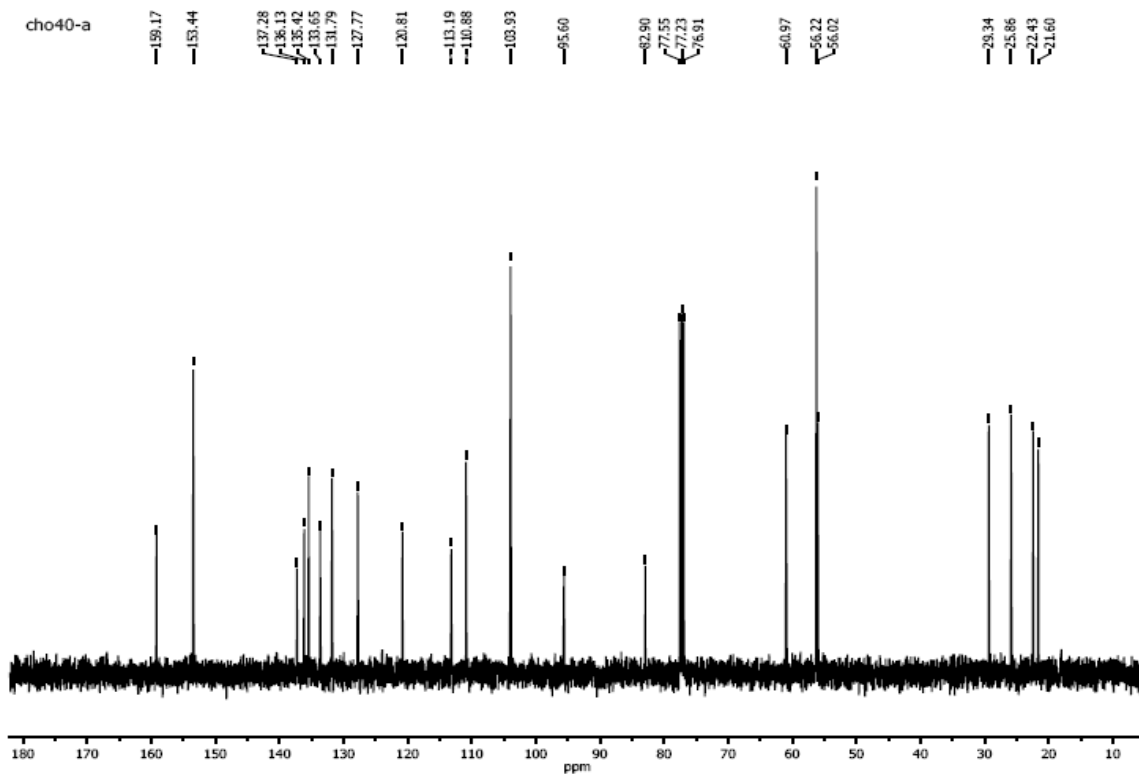

Alkyne 8{13}

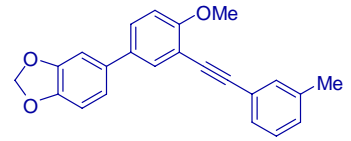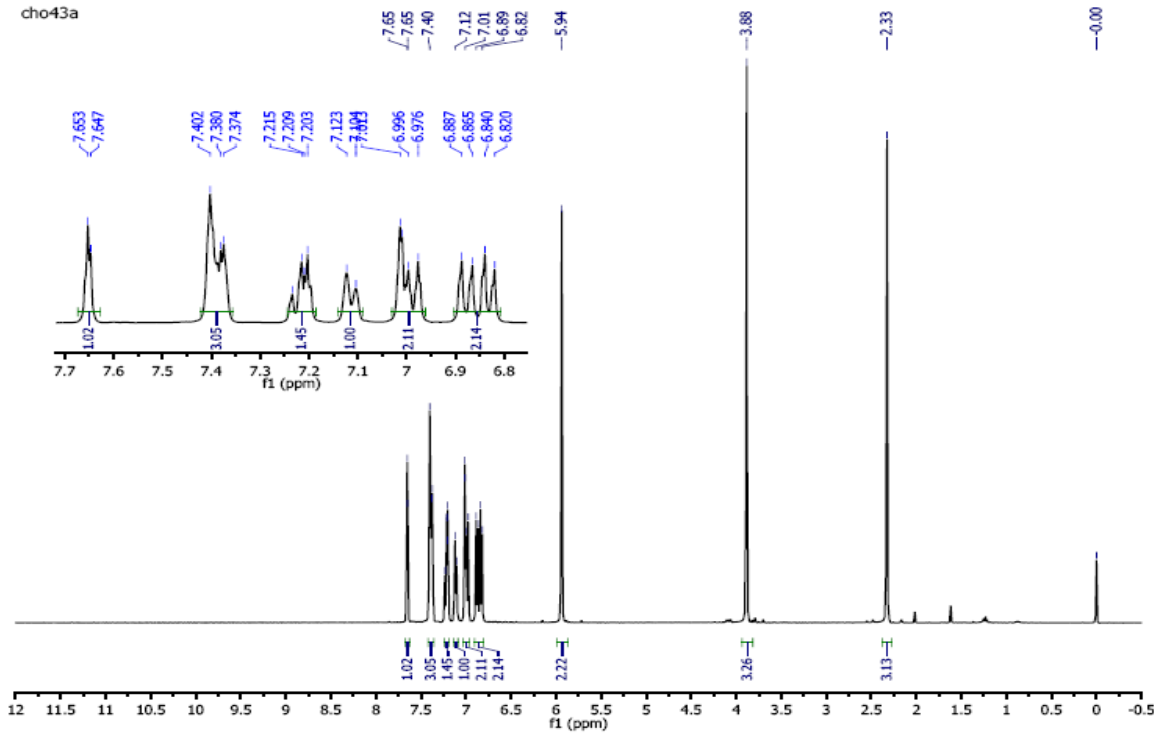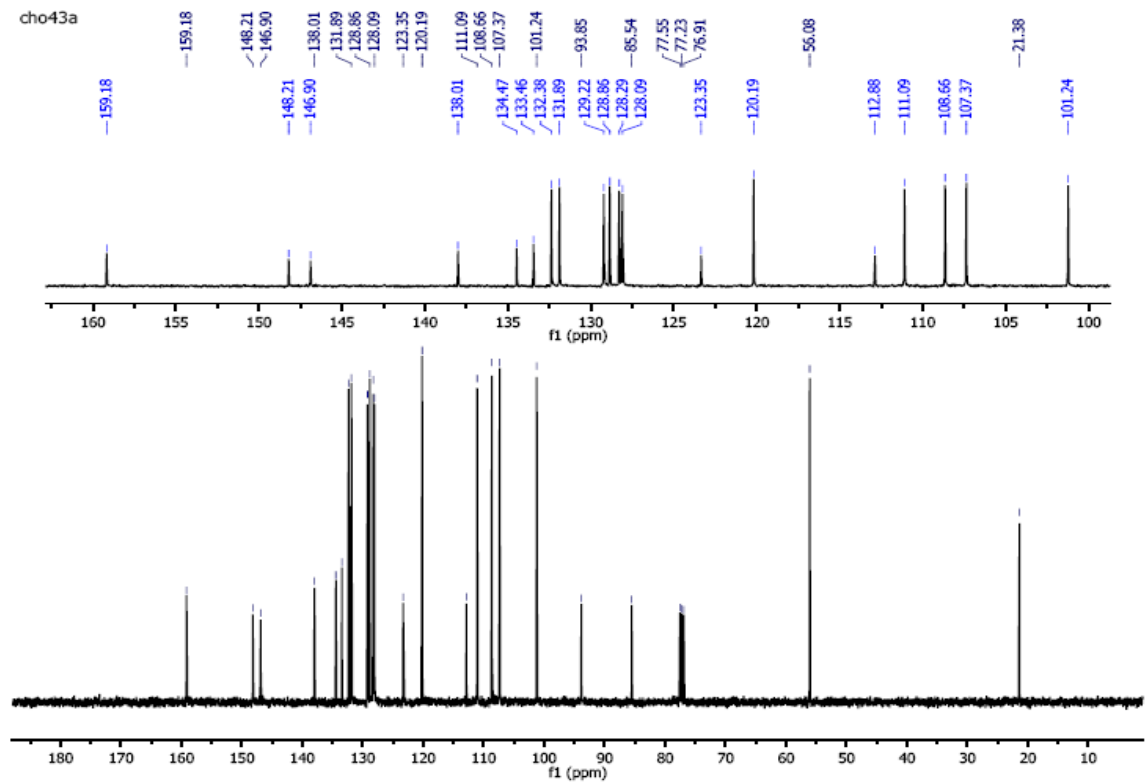

Alkyne 8 {14}

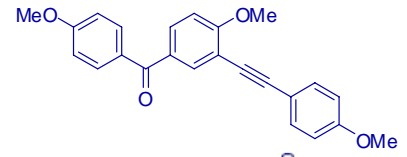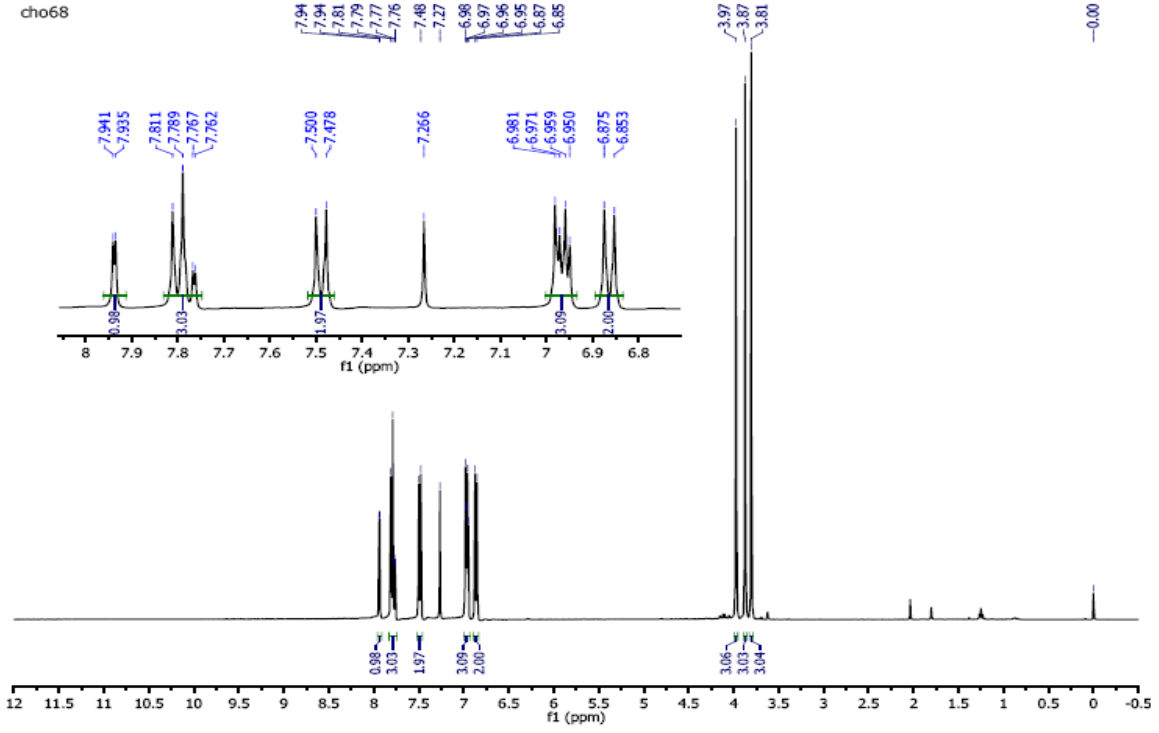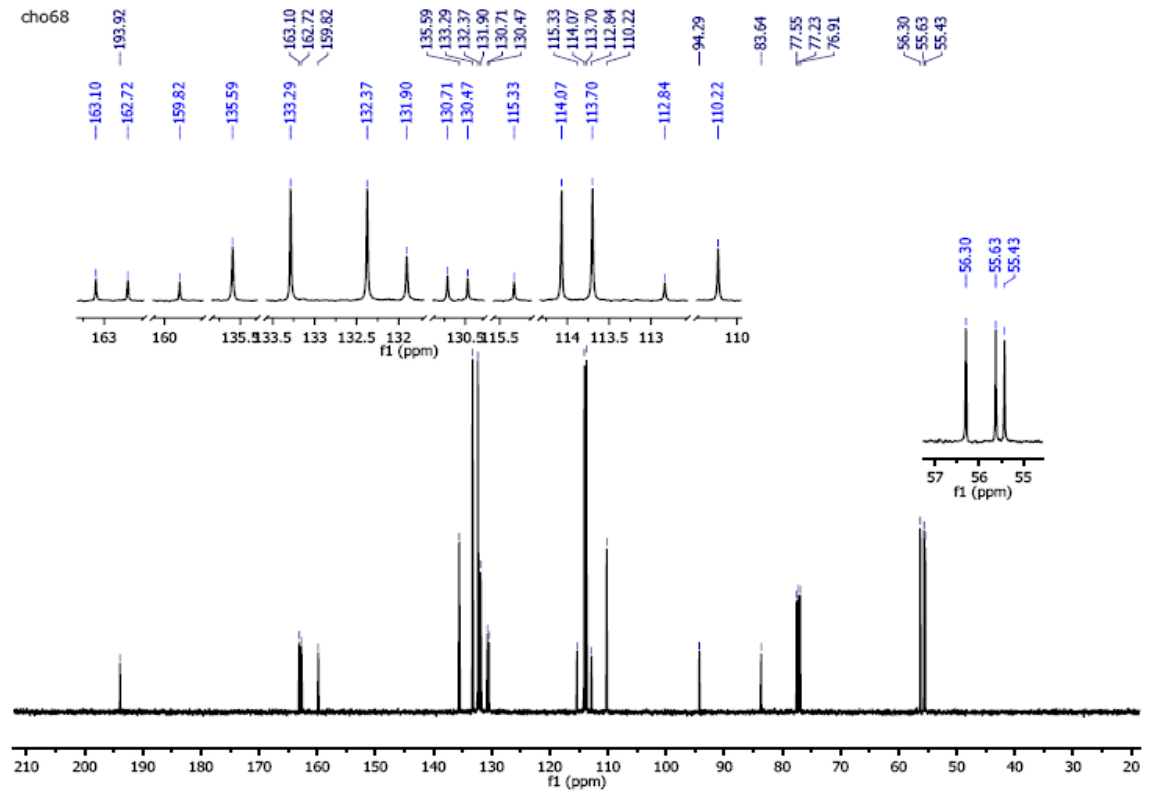

# Alkyne 8{15}

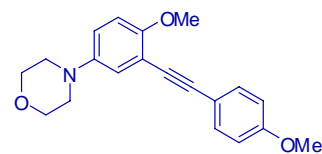

cho75

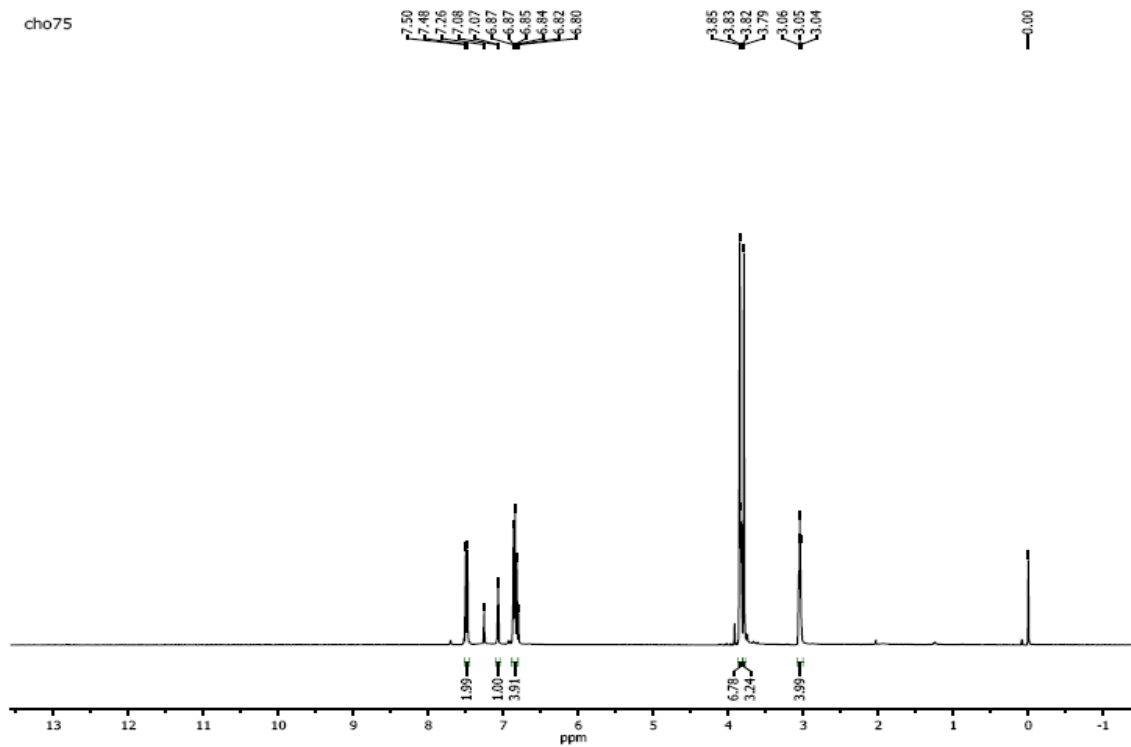

cho75

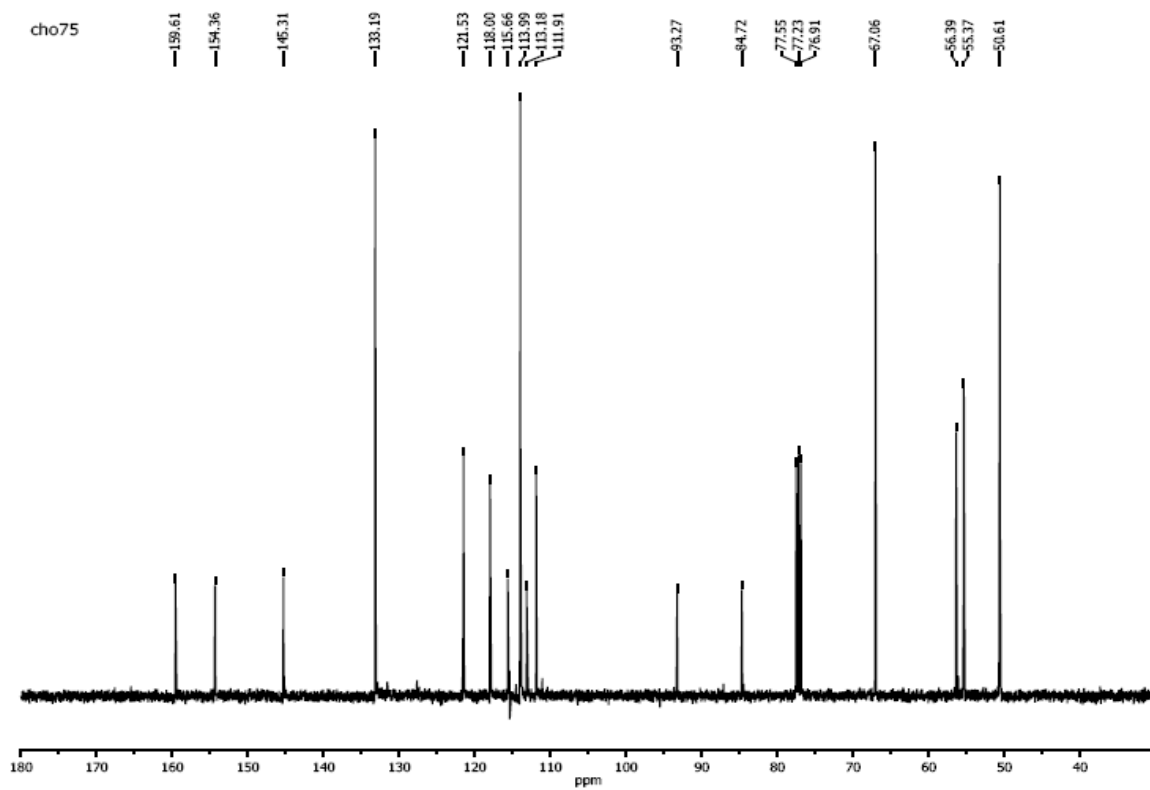

Alkyne 8{16}

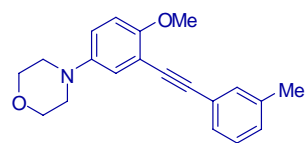

cho127

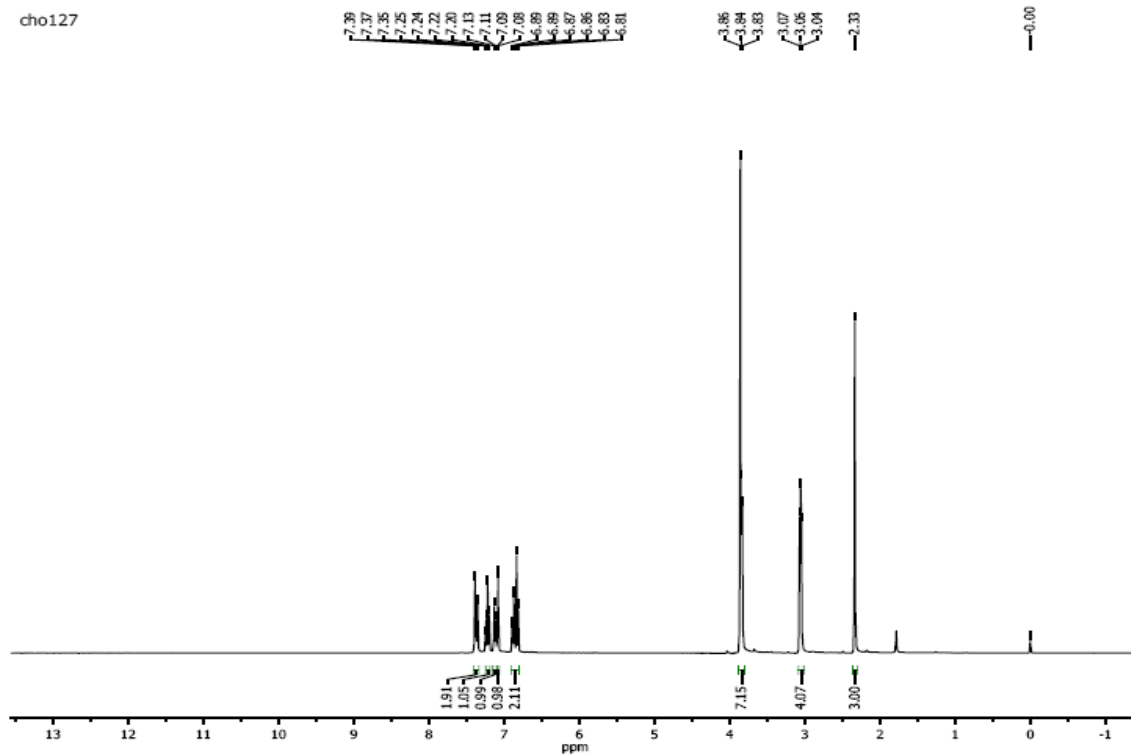

cho127

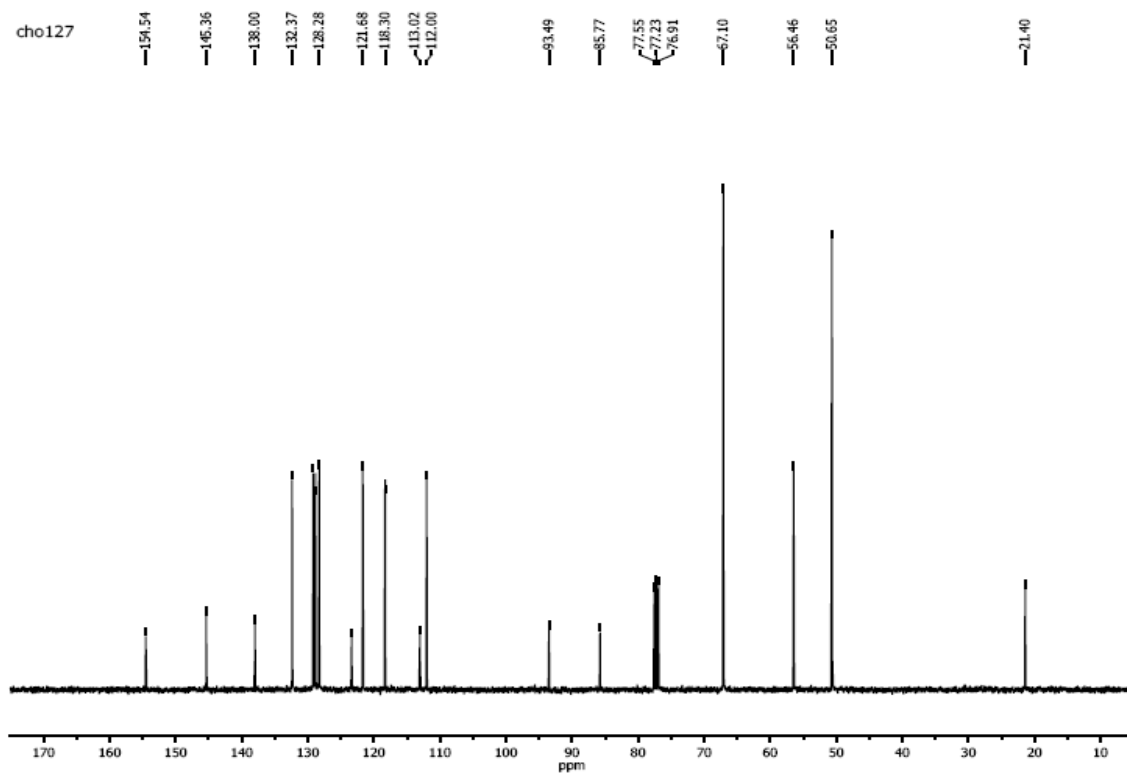

Alkyne 8 {17}

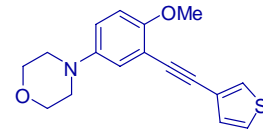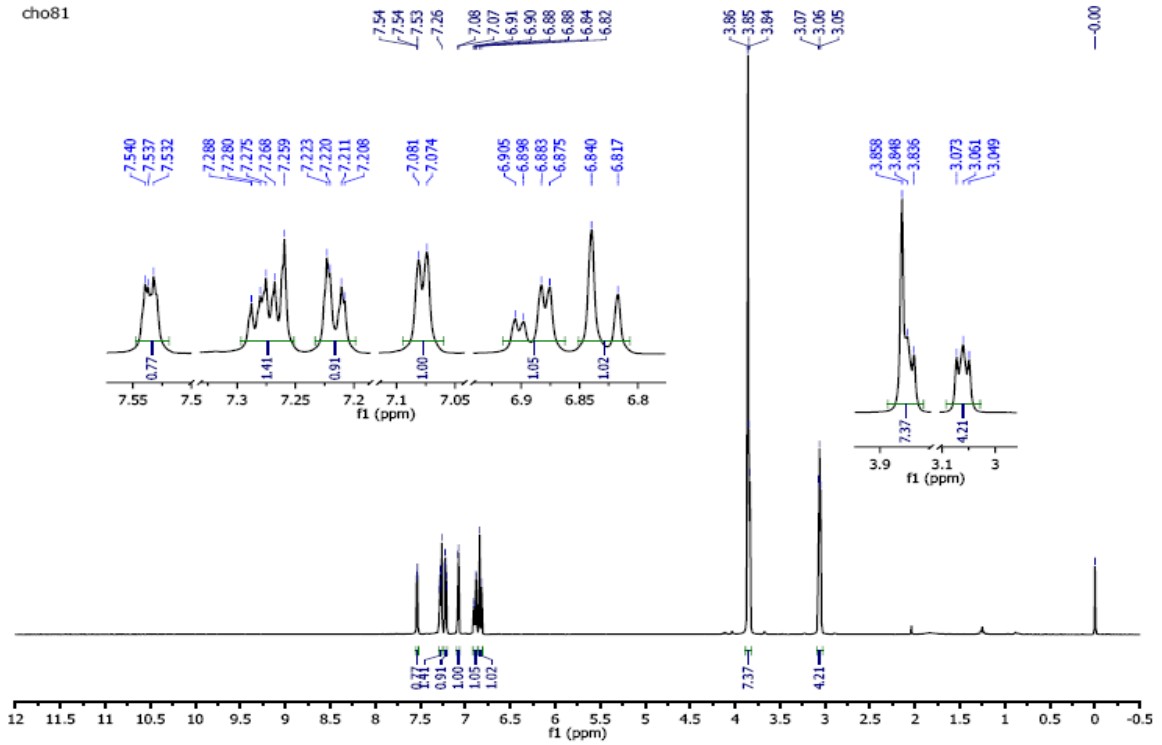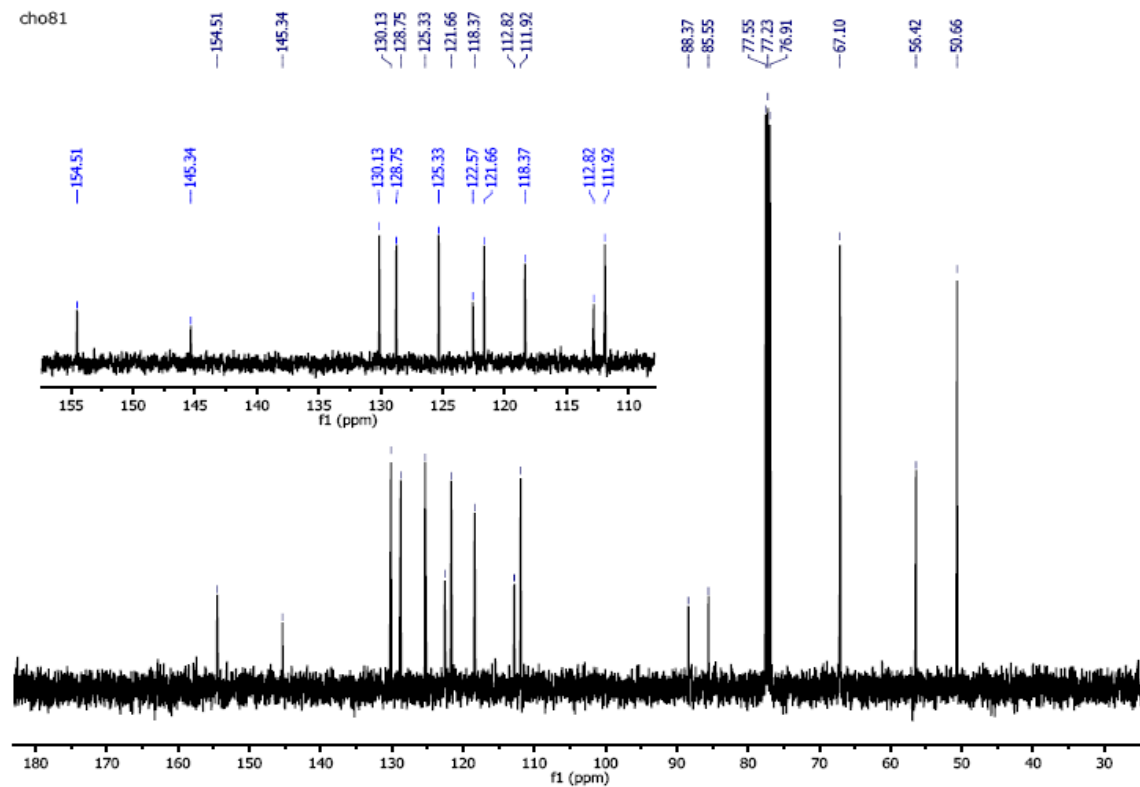

Alkyne 8{19}

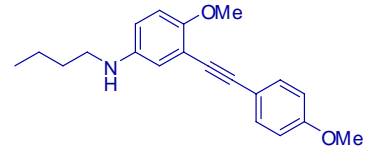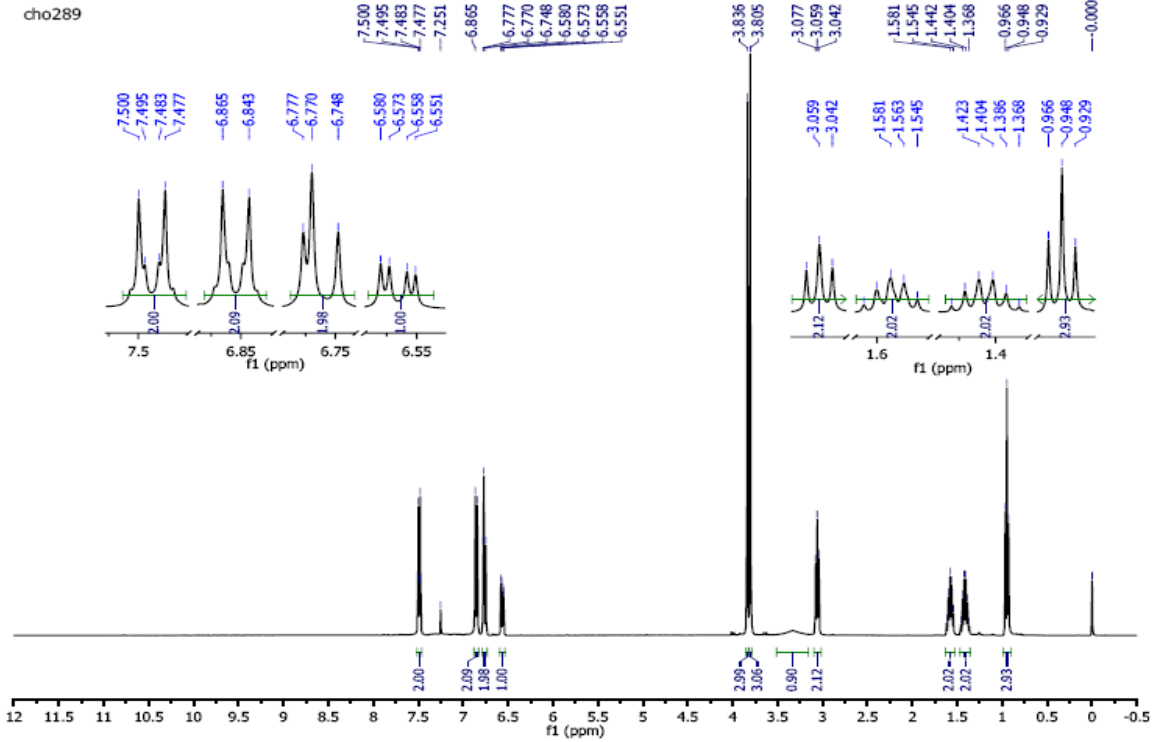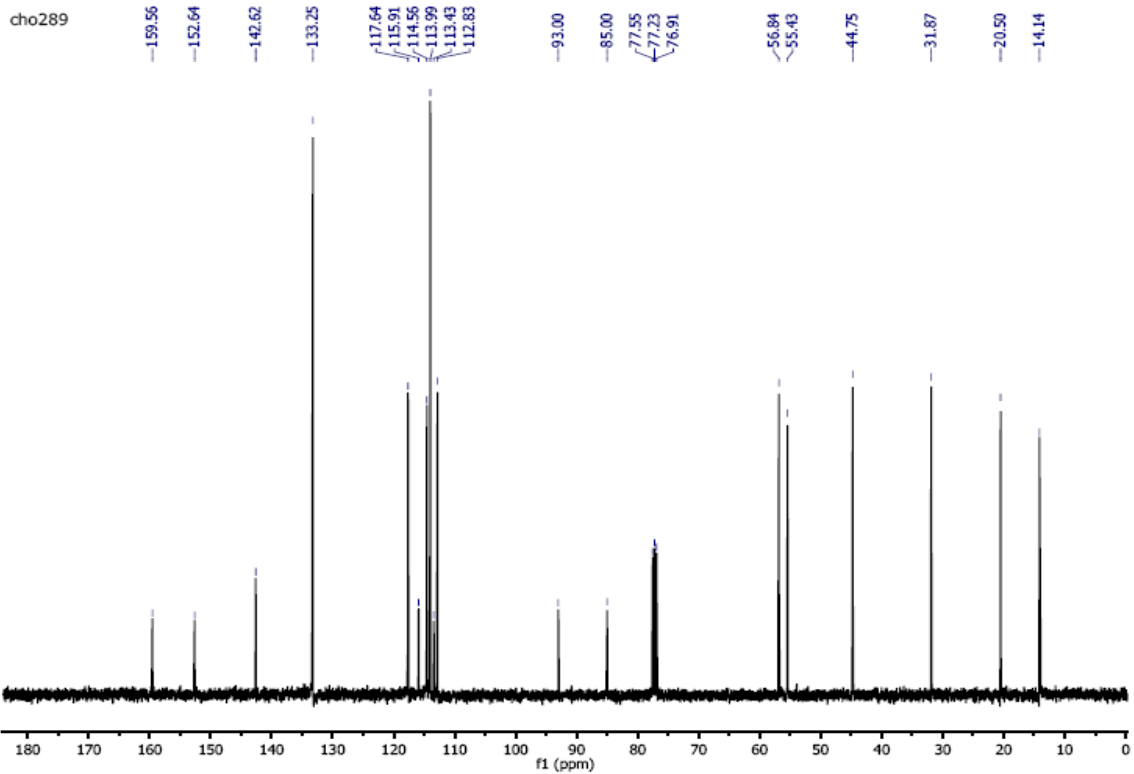

Alkyne 8 {20}

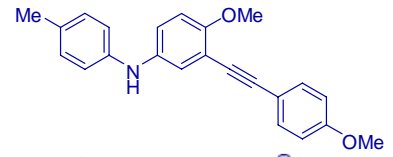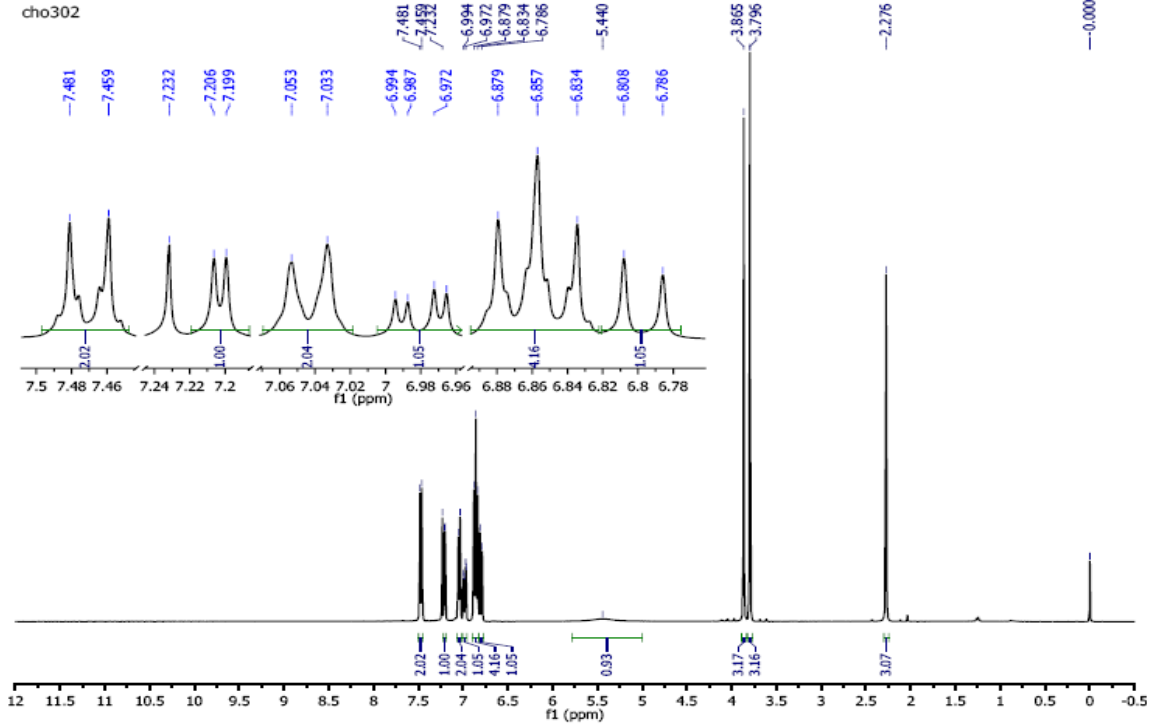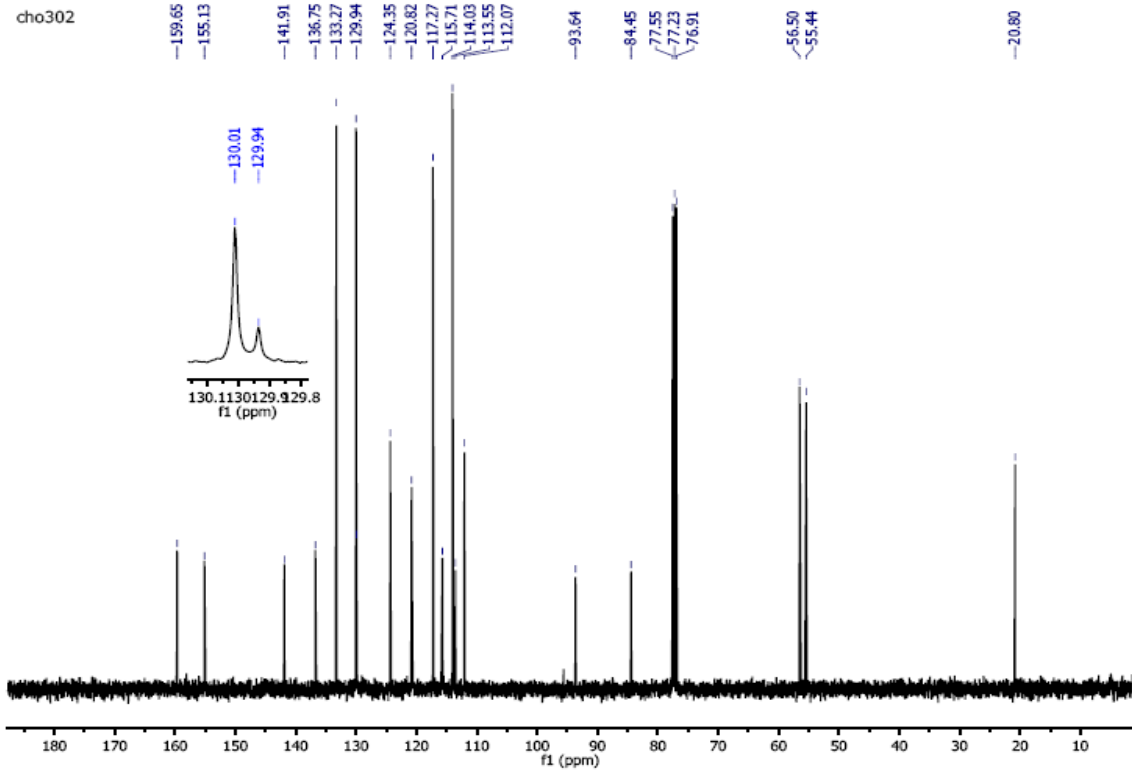



### 3-Iodobenzofuran 9{3}

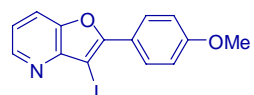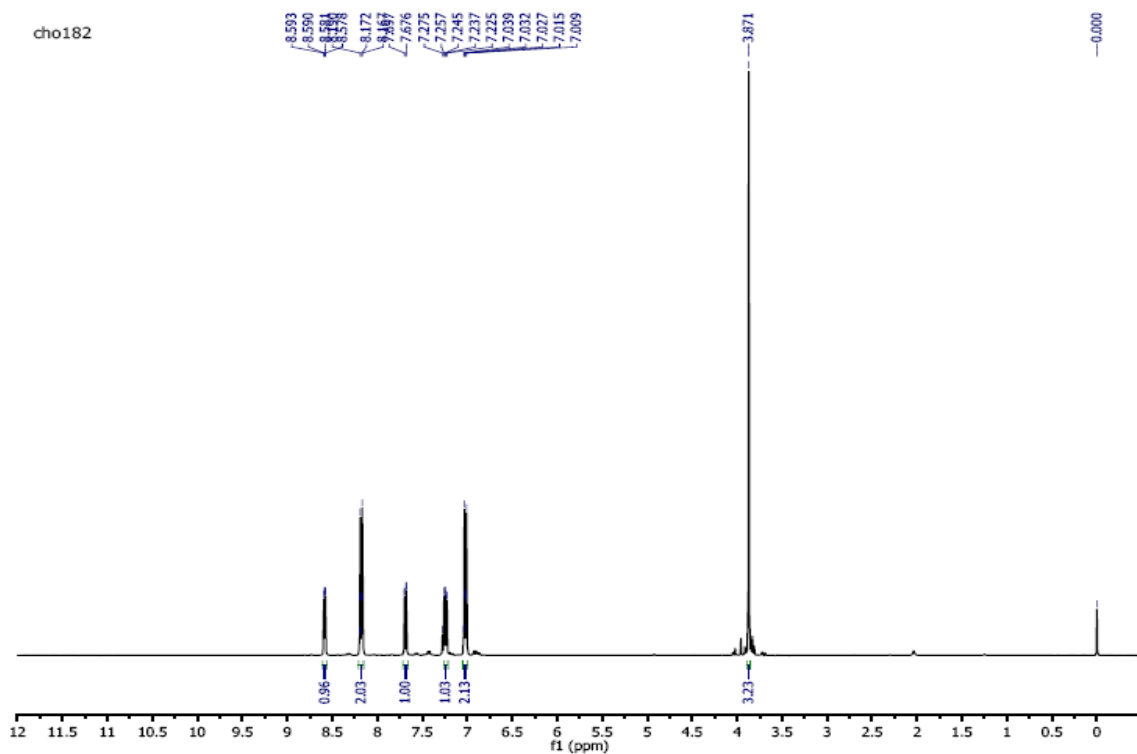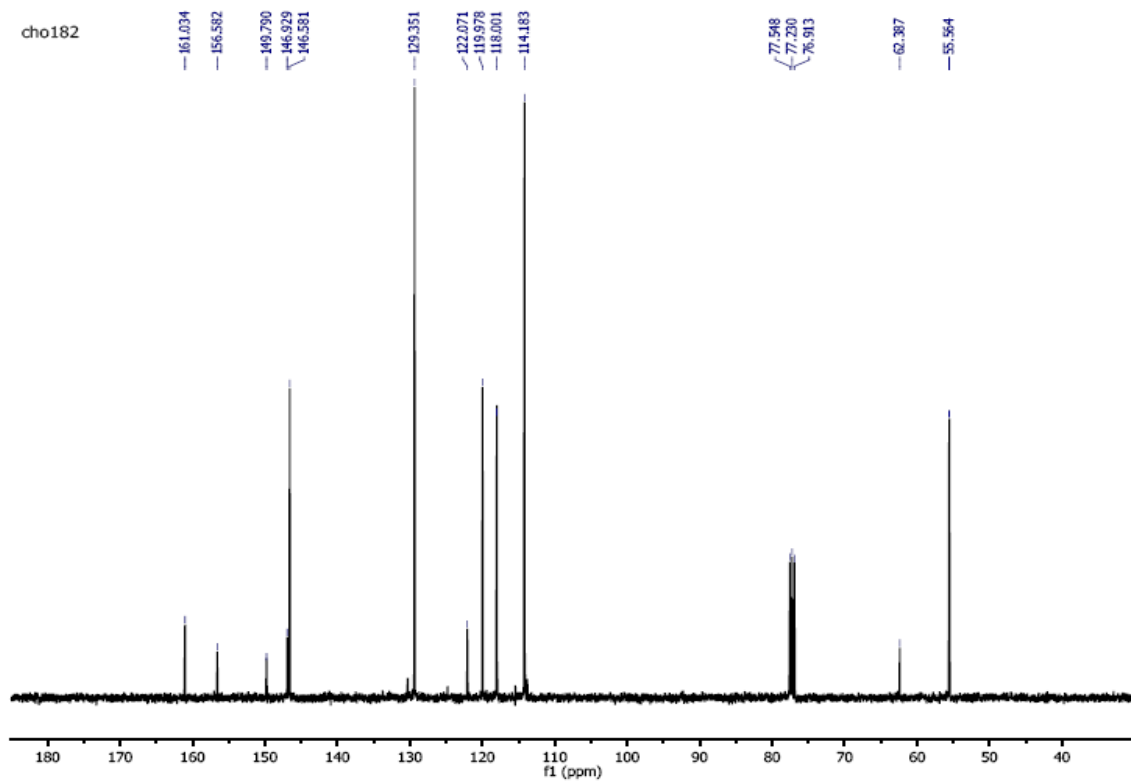

3-Iodobenzofuran 9{4}

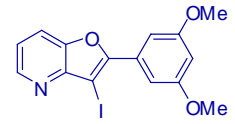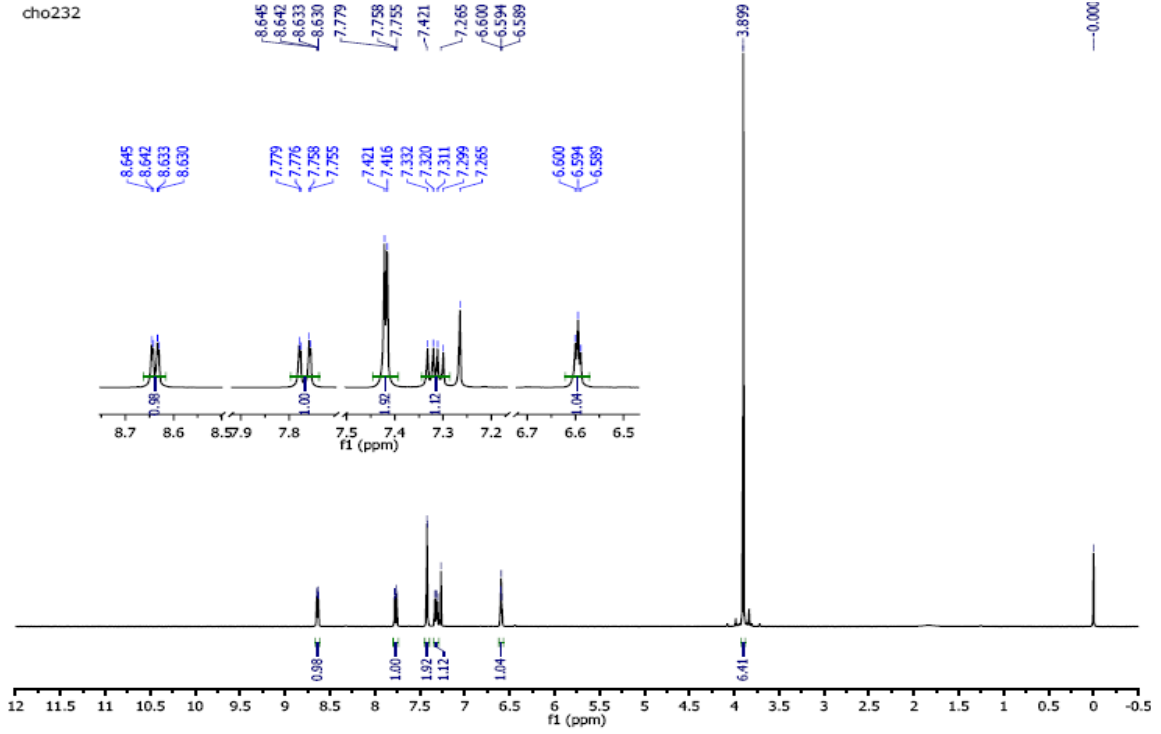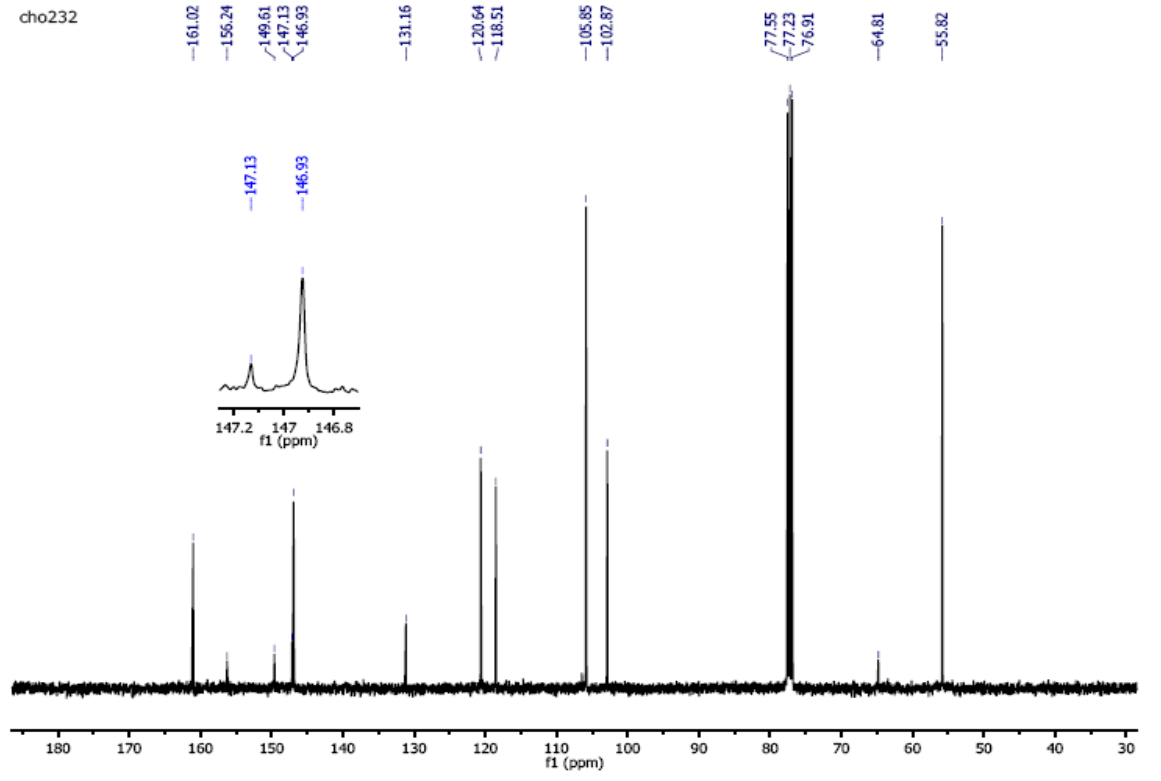

3-Iodobenzofuran 9{5}

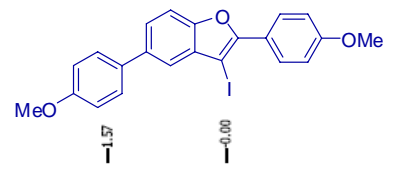

cho73

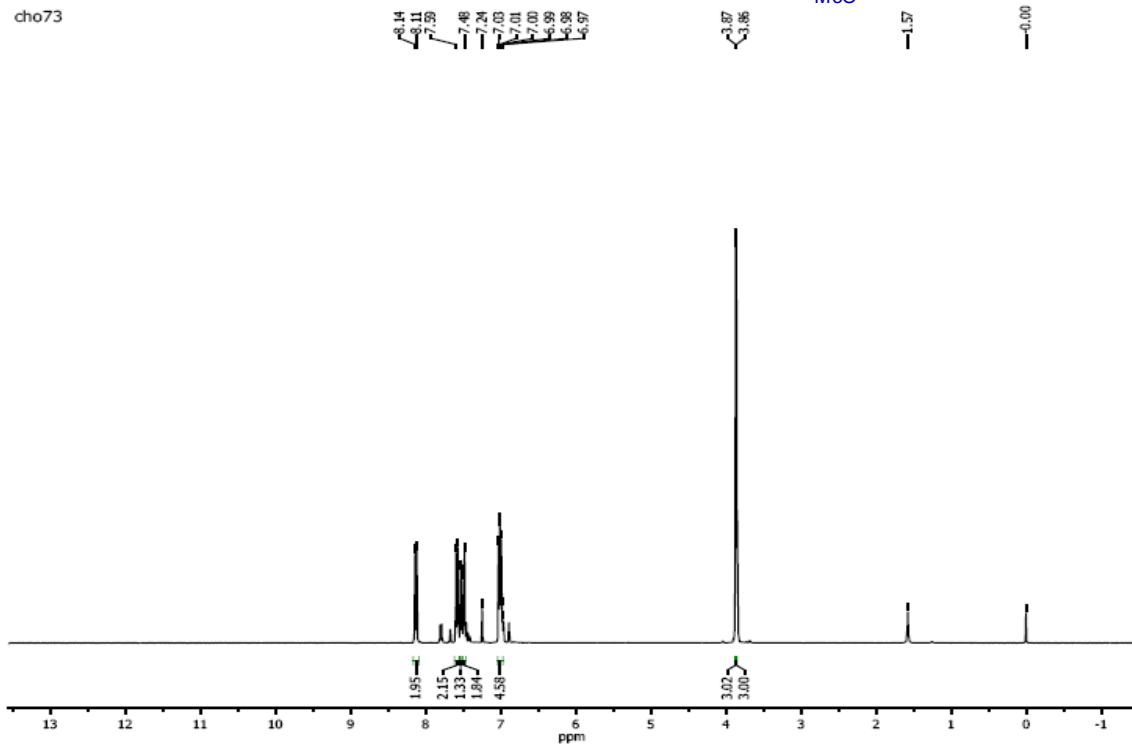

cho73

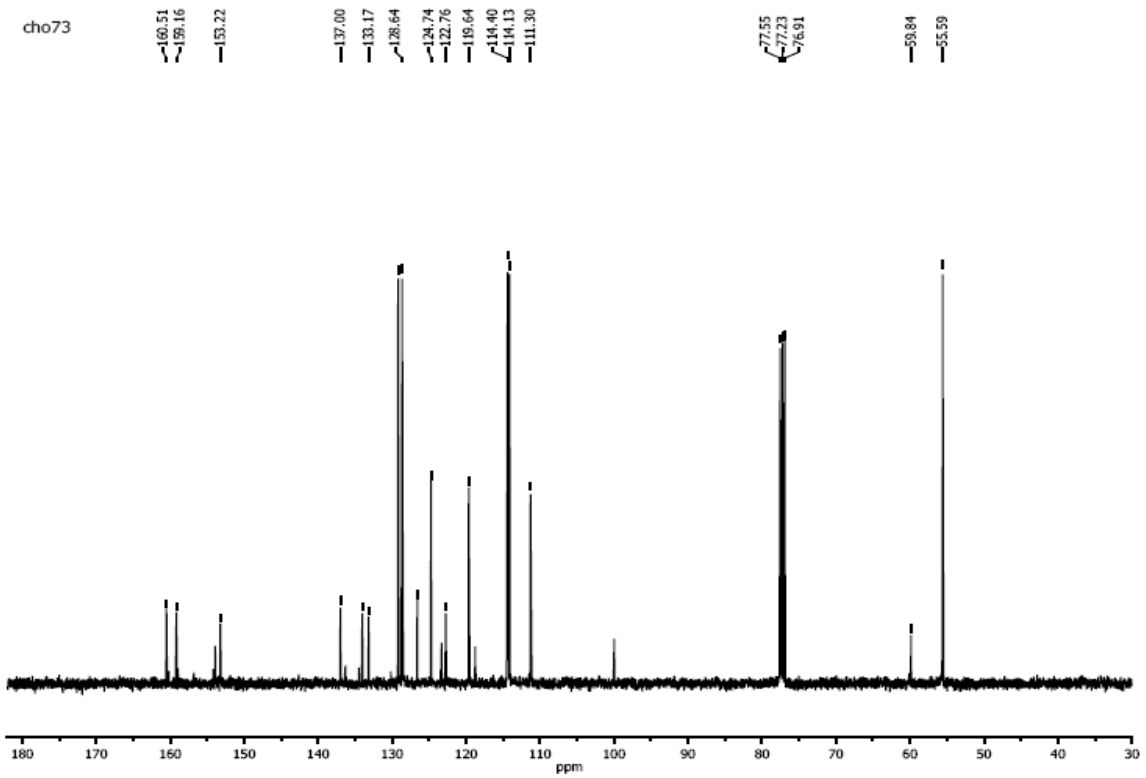

### 3-Iodobenzofuran 9{6}

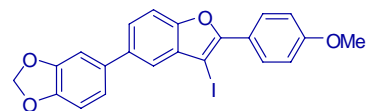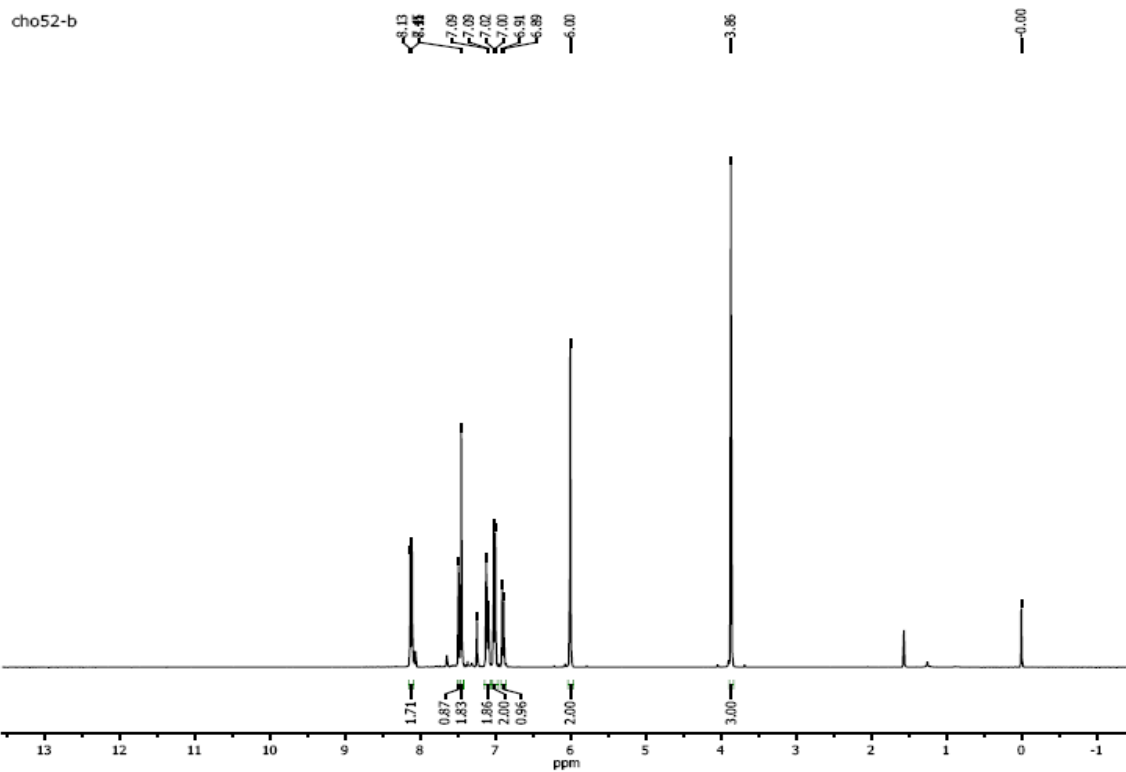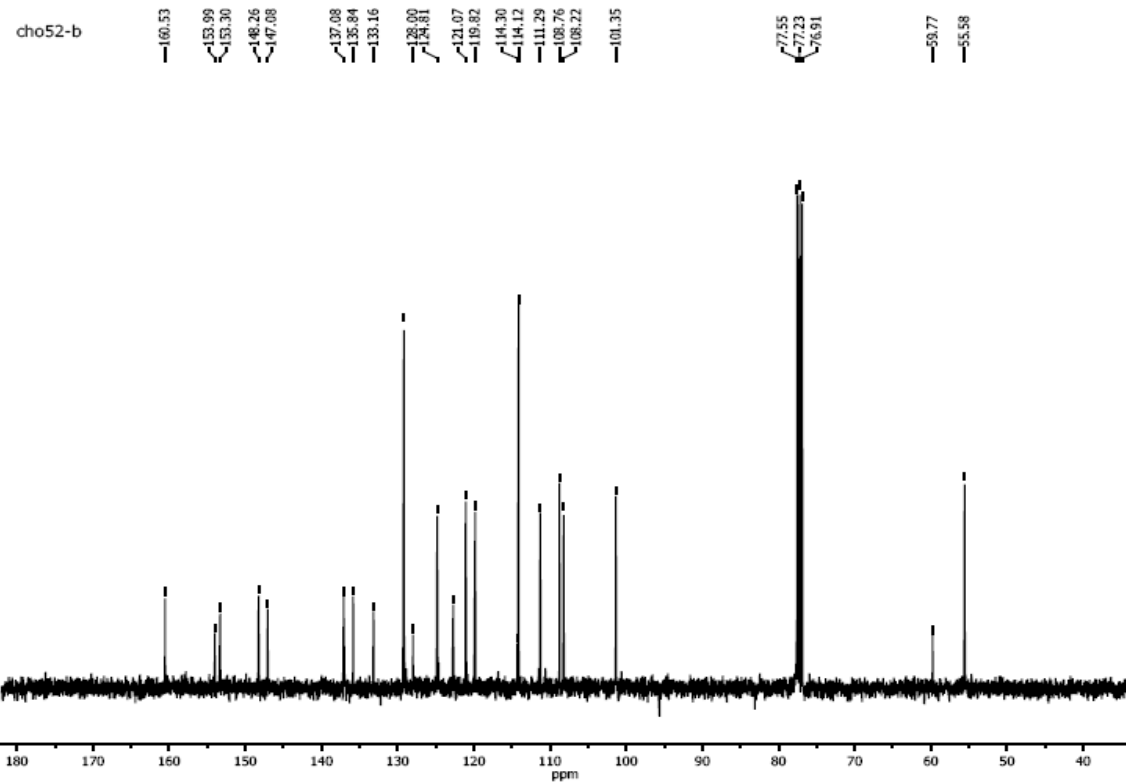

3-Iodobenzofuran 9{7}

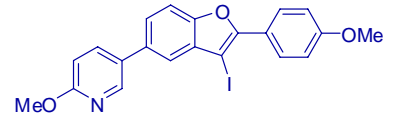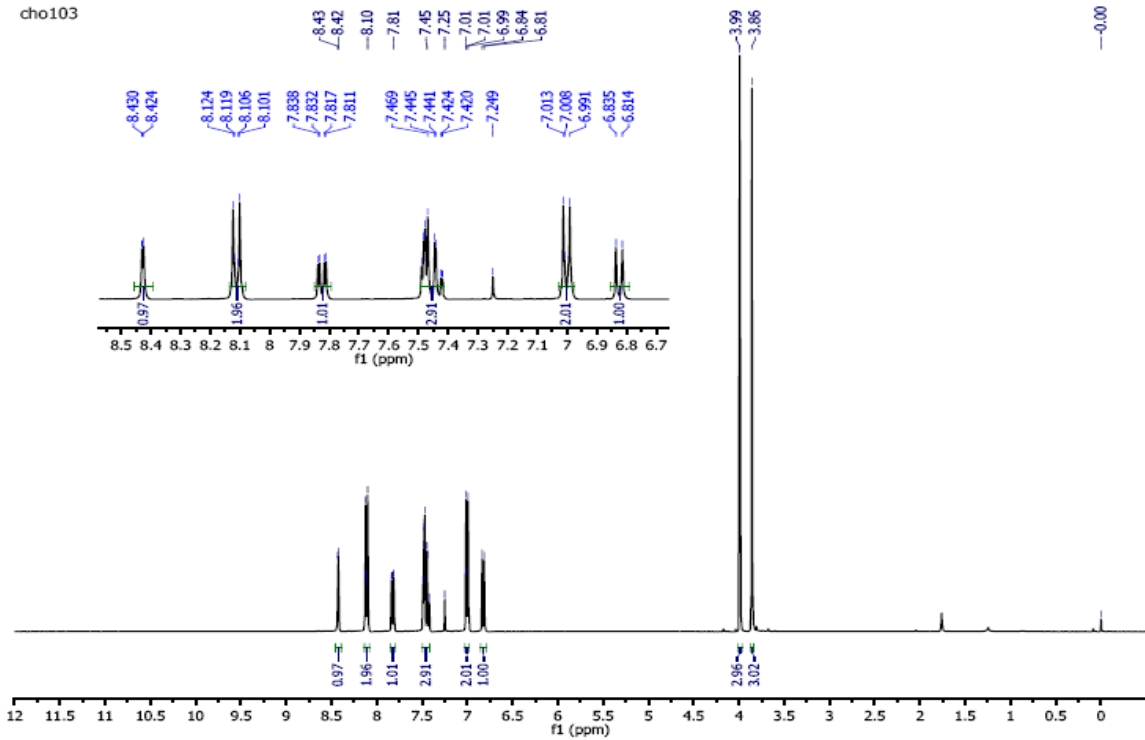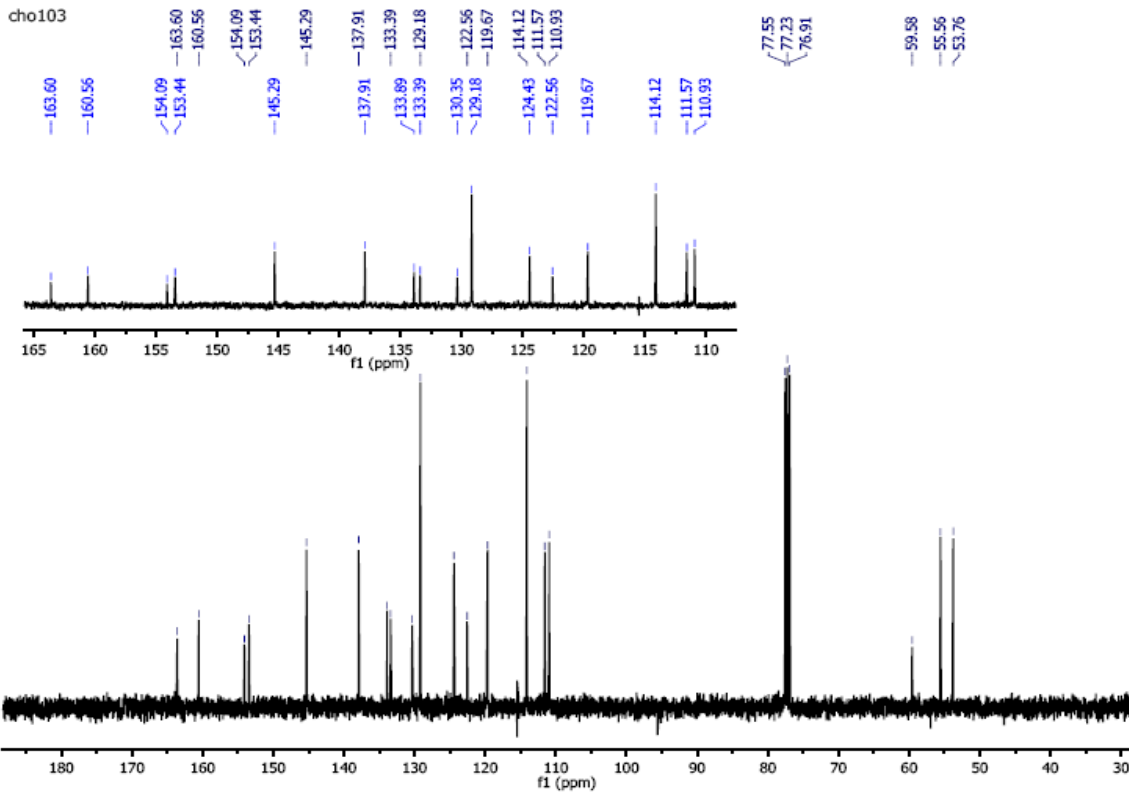

### 3-Iodobenzofuran 9{8}

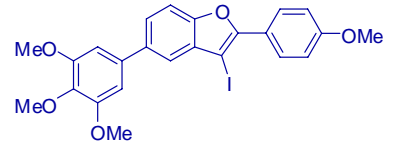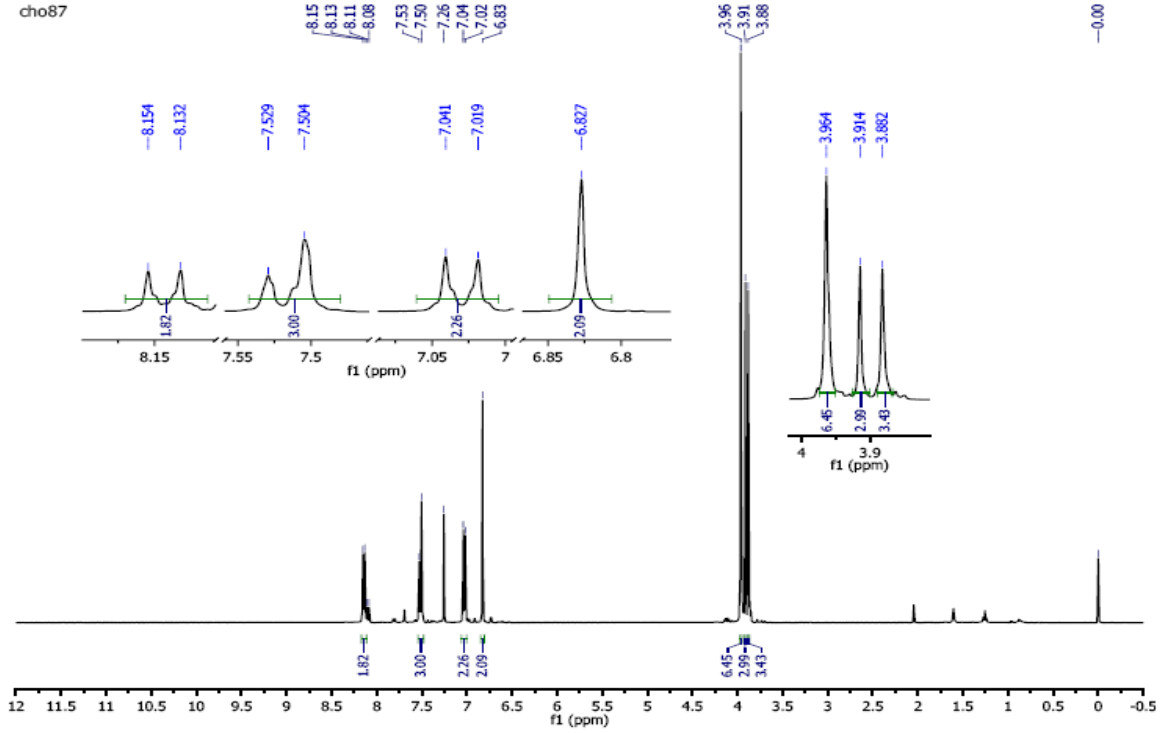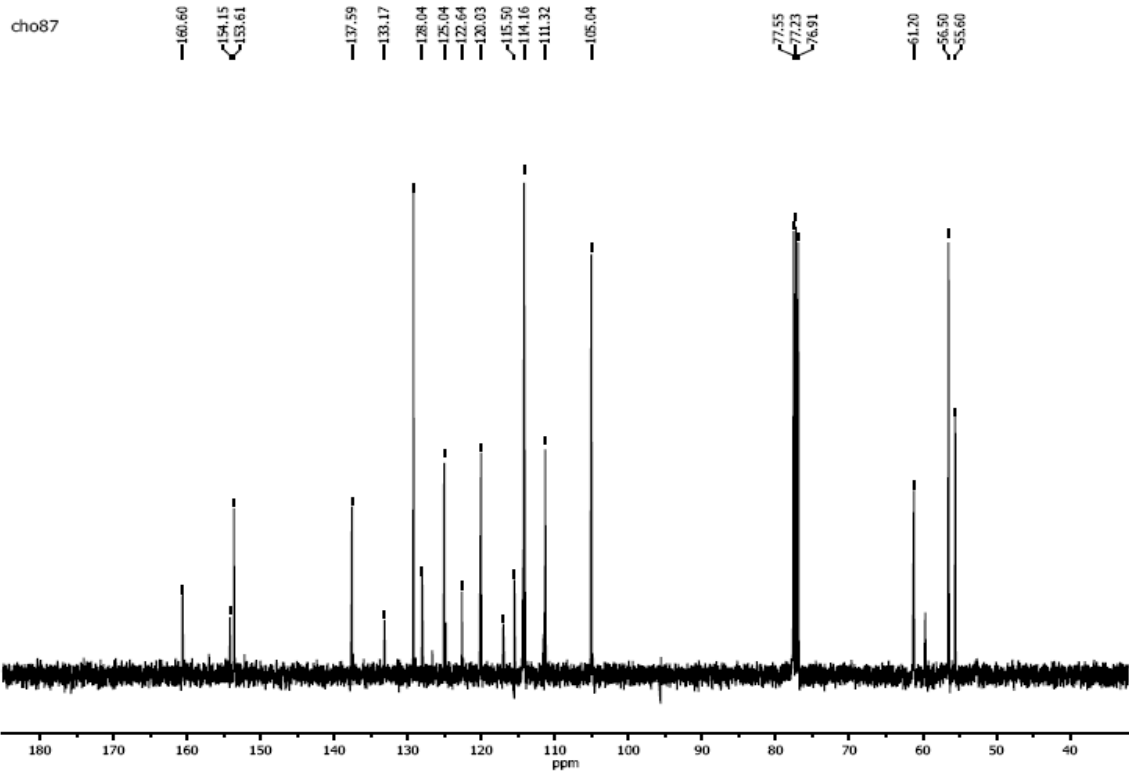

3-Iodobenzofuran 9{10}

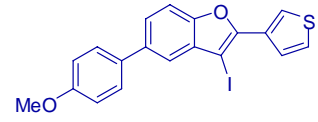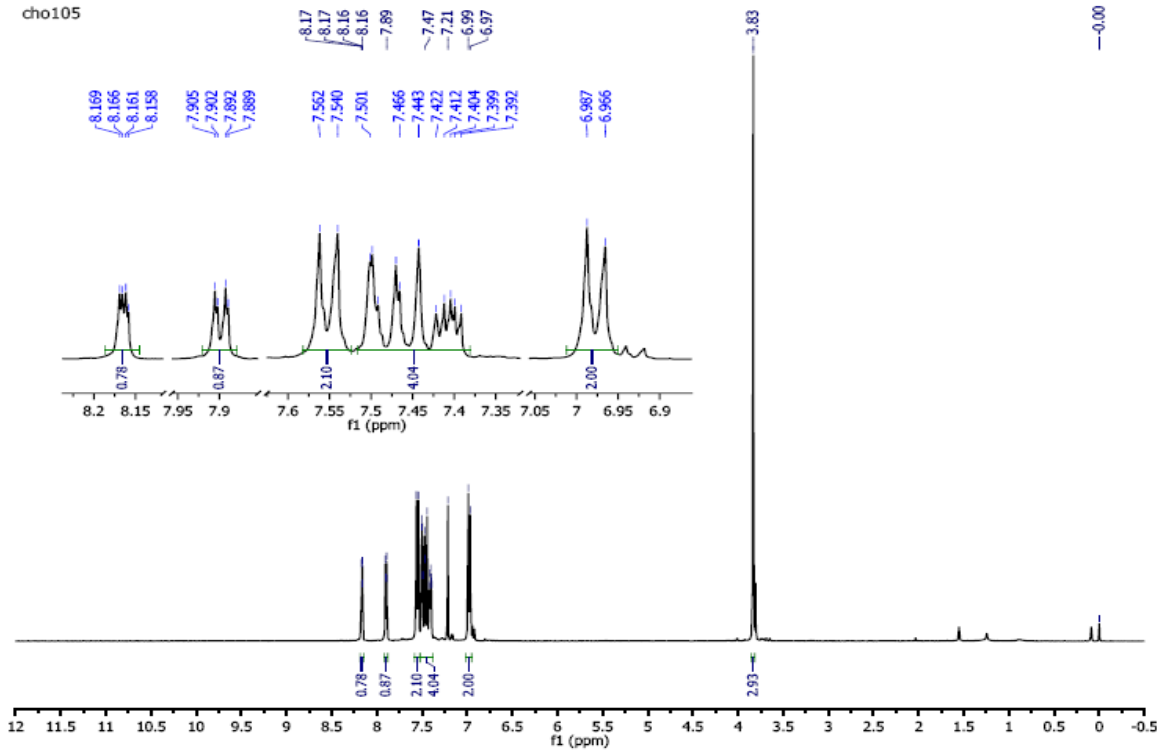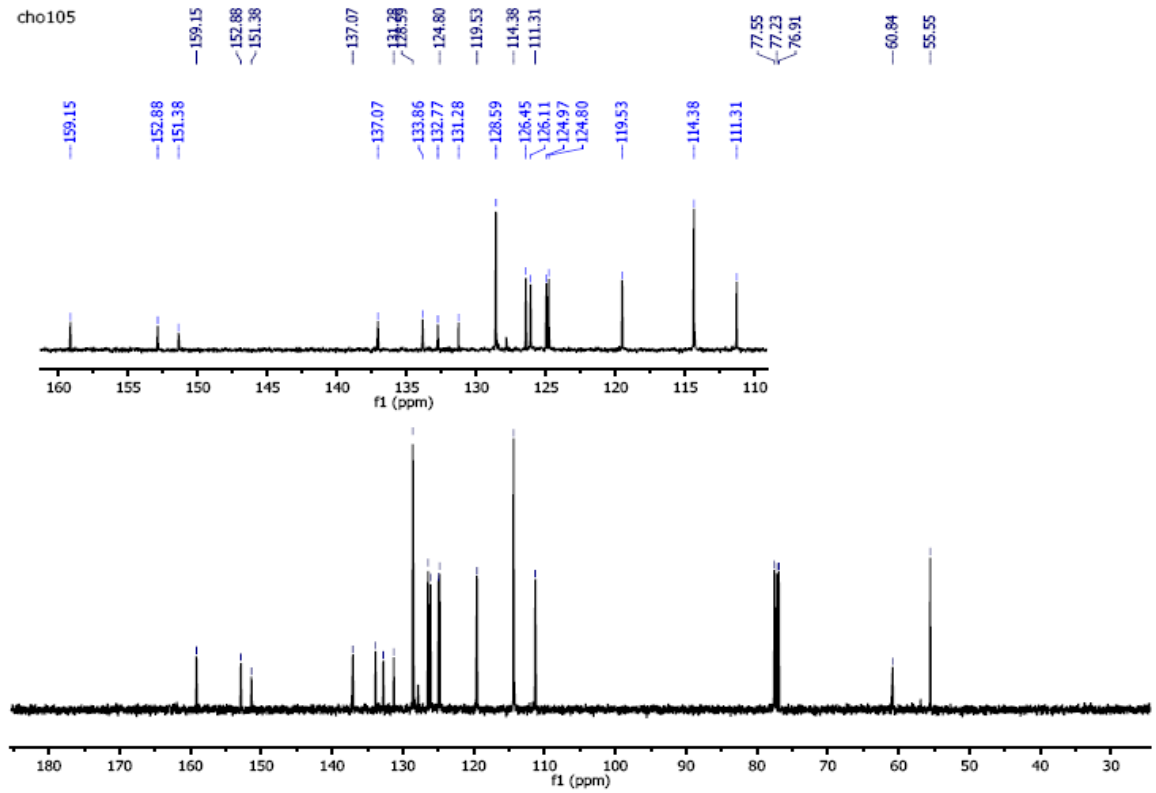

3-Iodobenzofuran 9 {13}

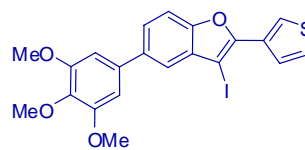

cho57

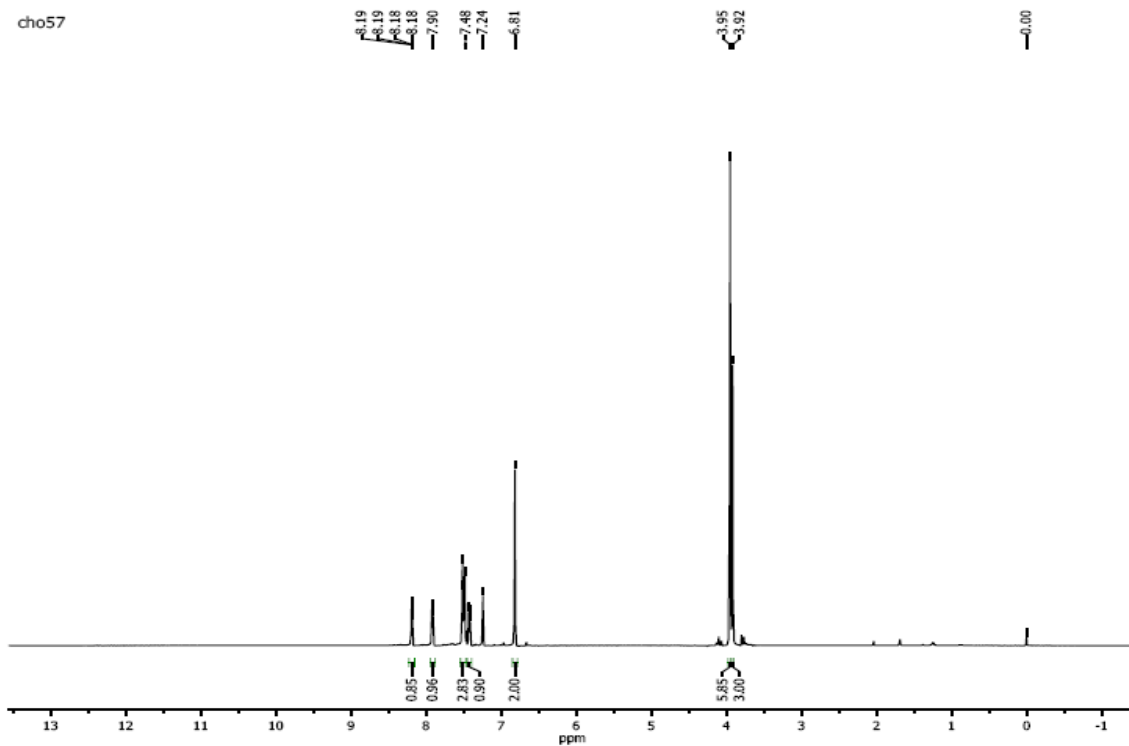

cho57

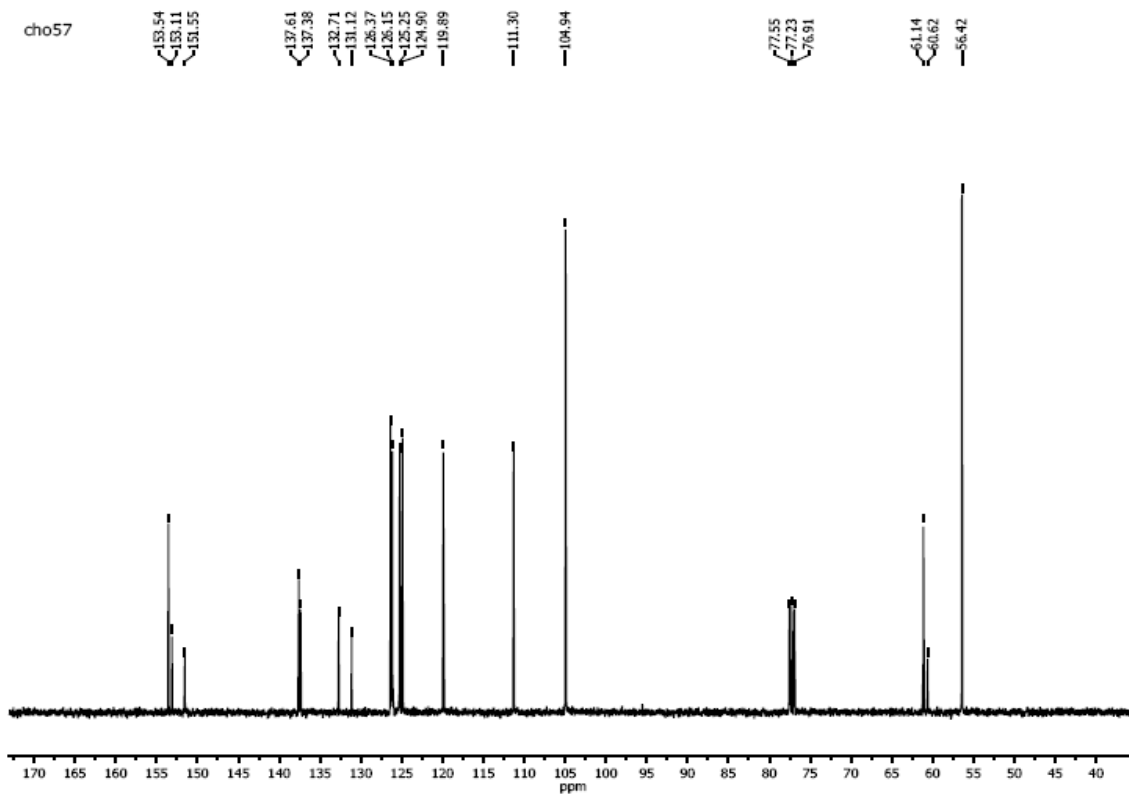



### 3-Iodobenzofuran 9{14}

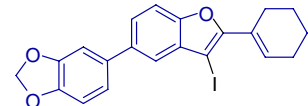

cho39

7.47  
7.46  
7.44  
7.43  
7.43  
7.41  
7.40  
7.38  
7.36  
7.25  
7.11  
7.10  
7.09  
7.08  
7.07  
6.90  
6.88  
6.81  
6.00

2.63  
2.62  
2.28  
2.28  
1.77  
1.71  
1.70  
1.69  
1.68  
0.00

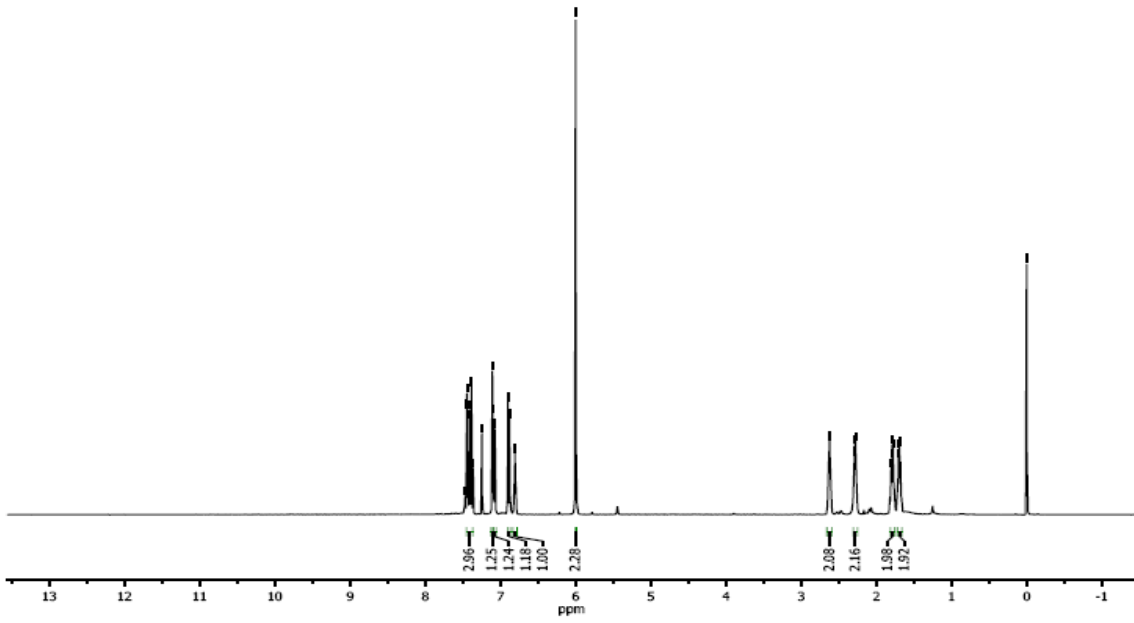

cho39

155.90  
152.81  
148.23  
147.02  
136.85  
136.17  
135.94  
132.13  
128.12  
124.63  
121.05  
119.83  
111.42  
111.09  
108.73  
108.22  
101.33

77.55  
77.23  
76.91

59.19

26.86  
25.94  
22.71  
21.91

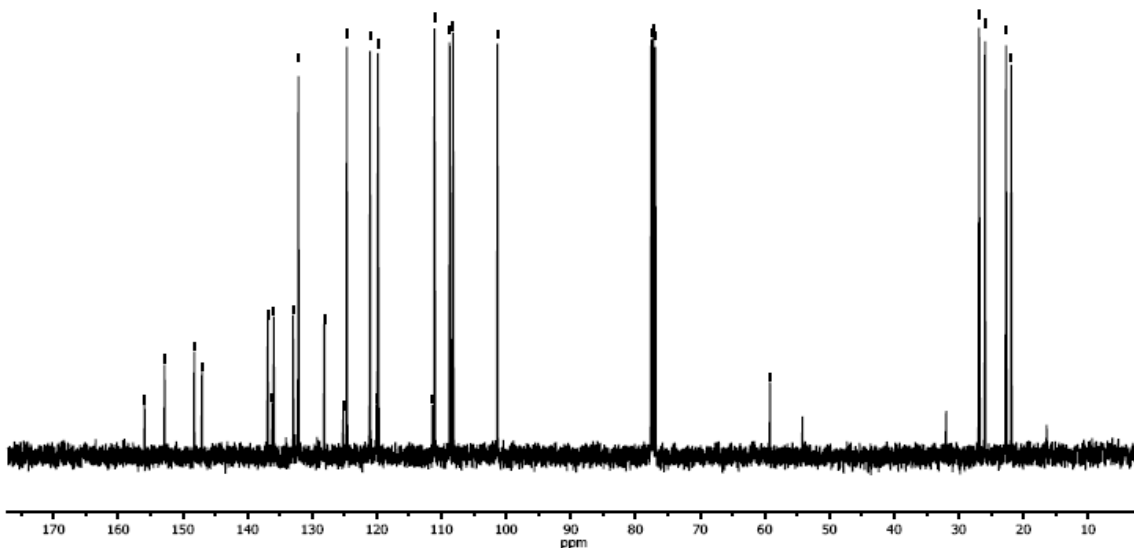

3-Iodobenzofuran 9{17}

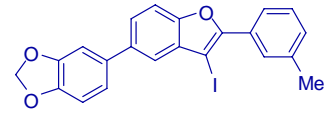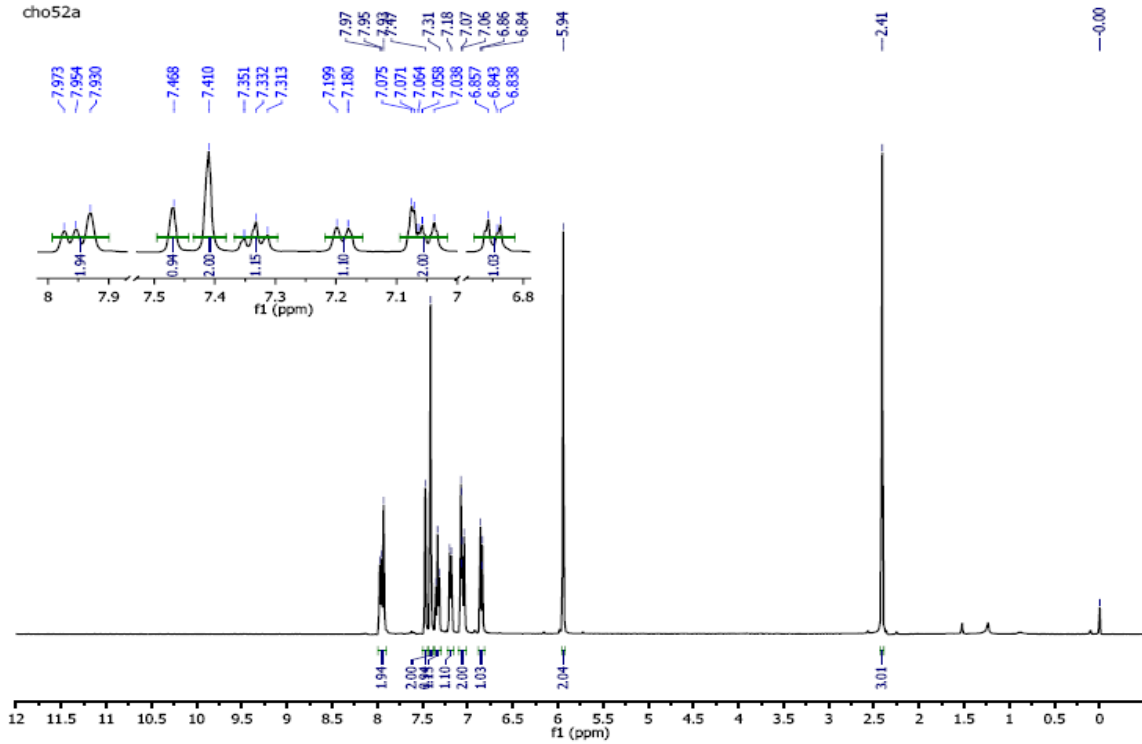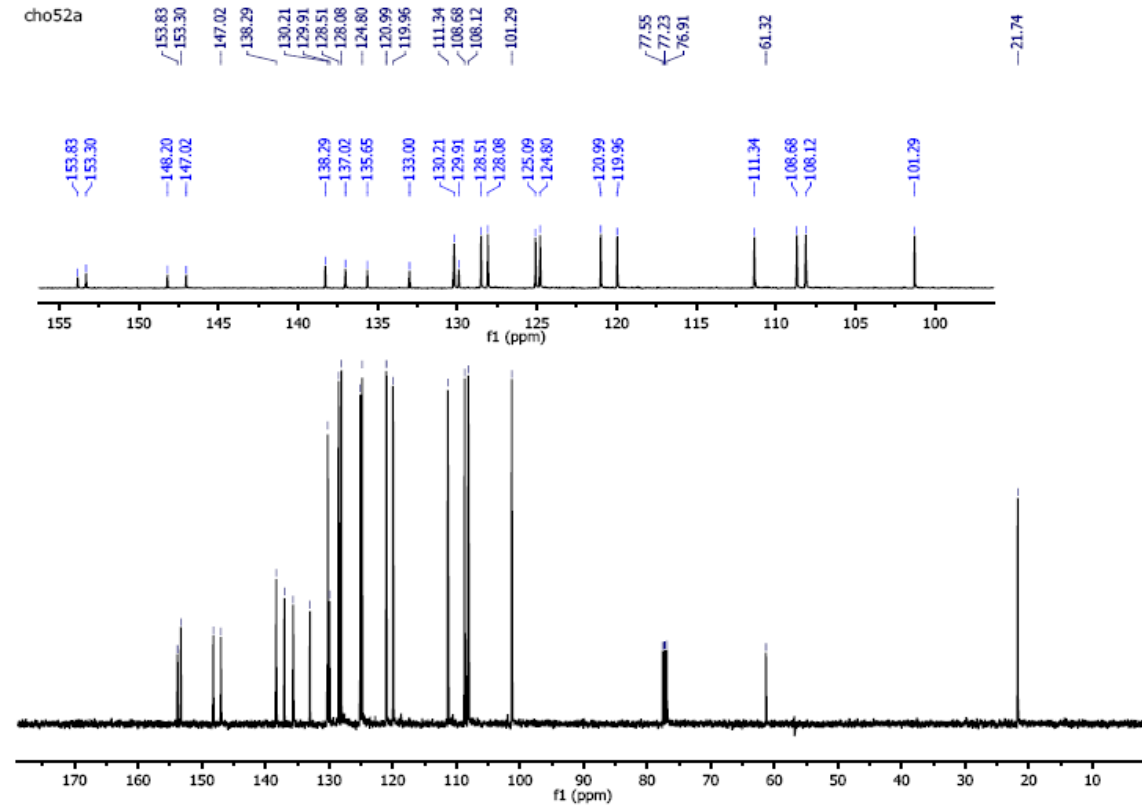

3-Iodobenzofuran 9{18}

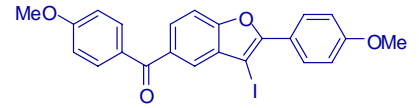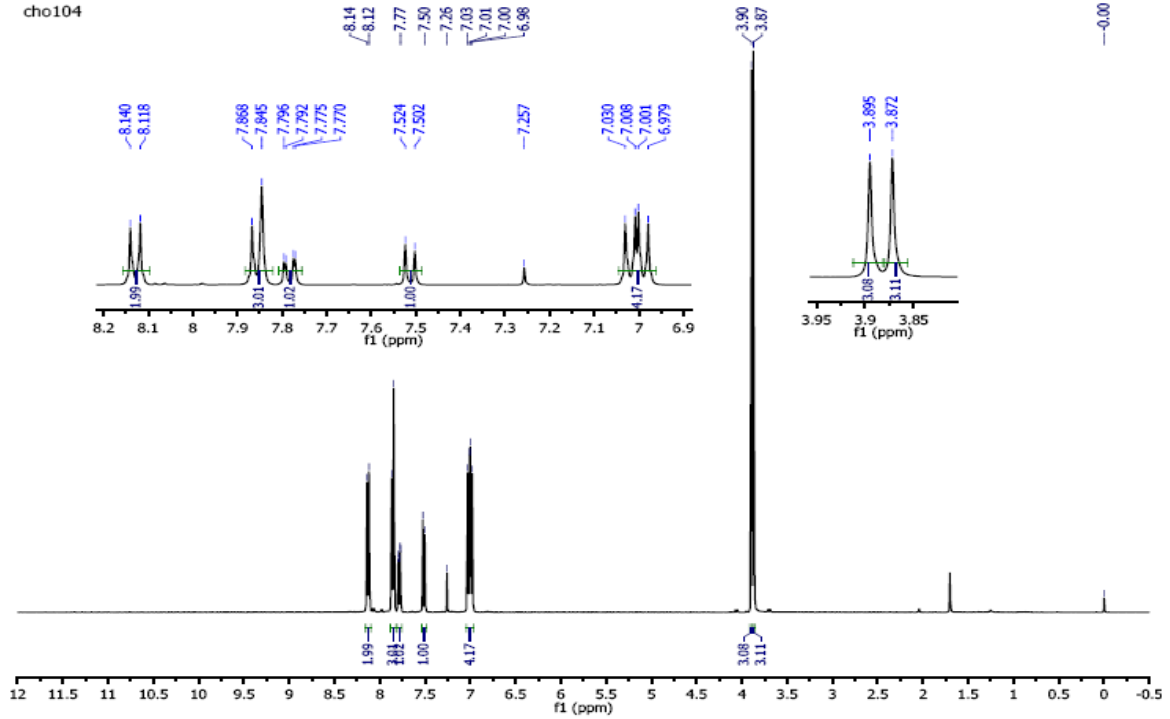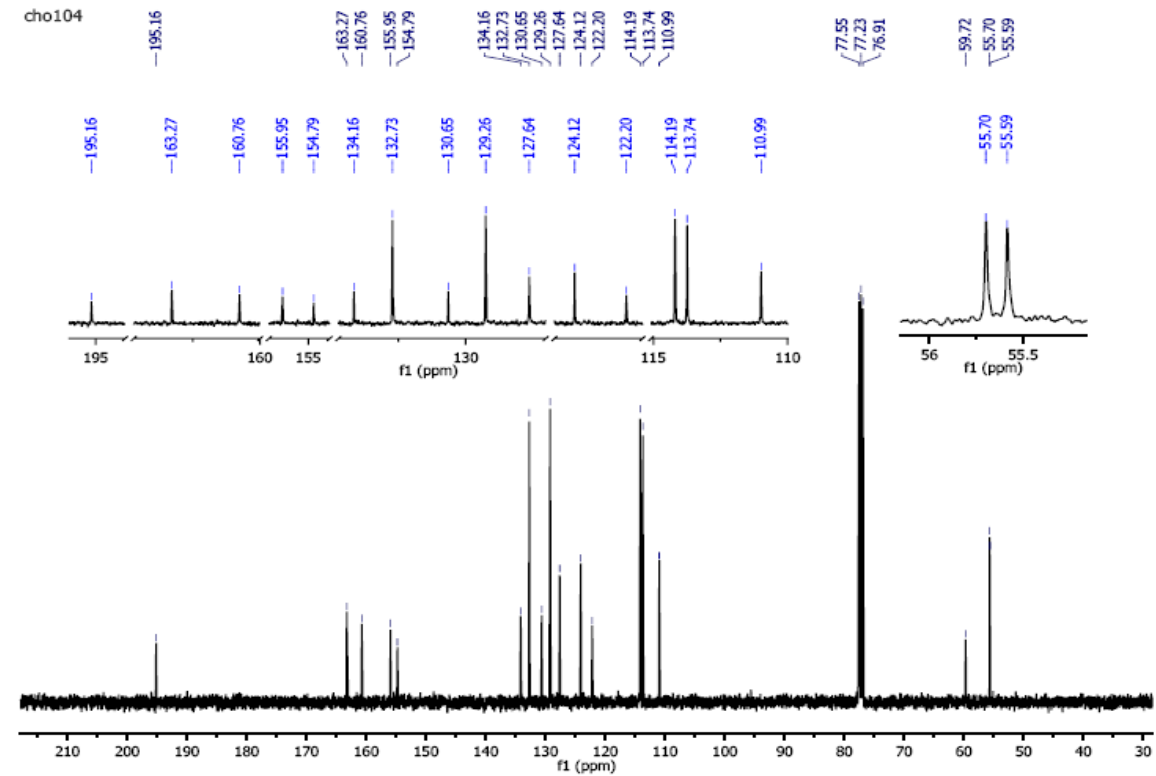

### 3-Iodobenzofuran 9{19}

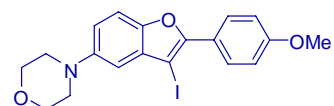

cho76

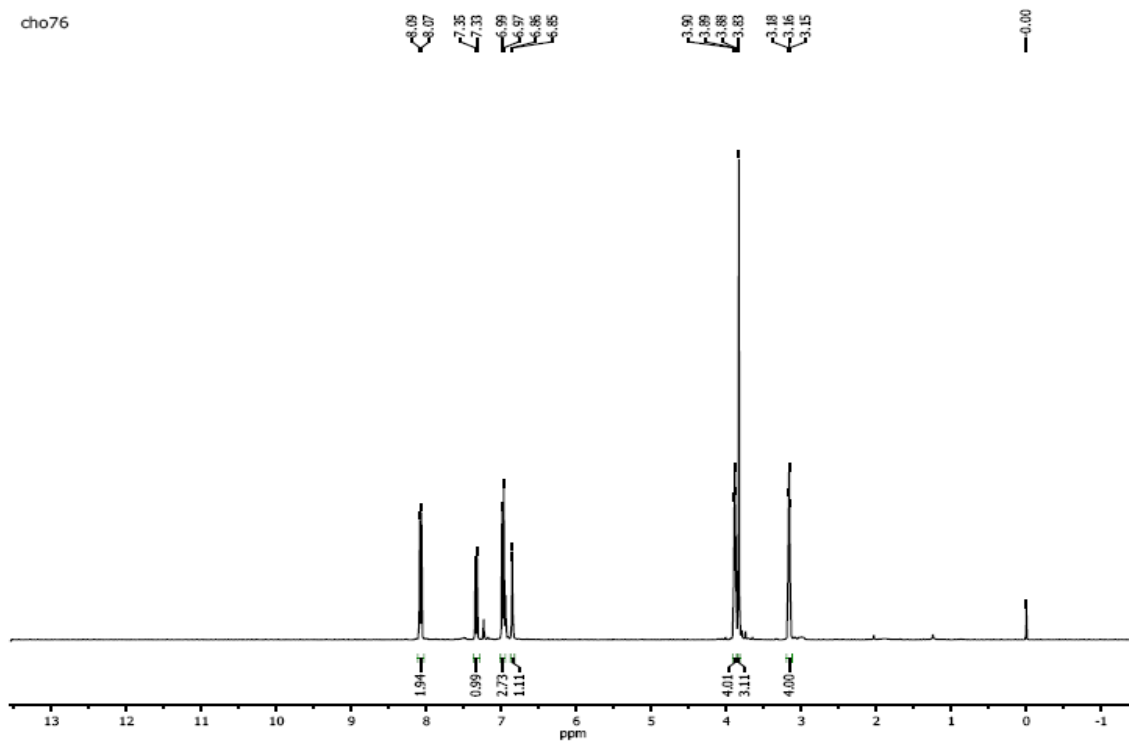

cho76

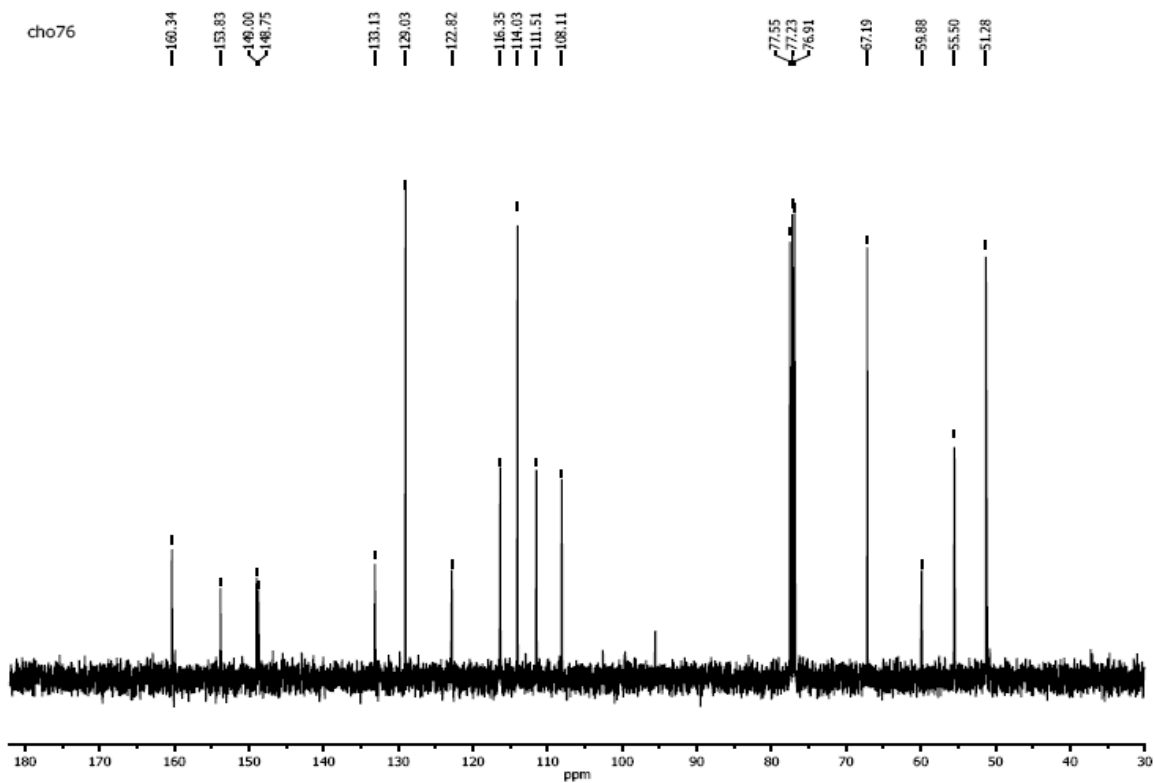

### 3-Iodobenzofuran 9 {20}

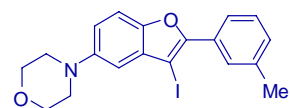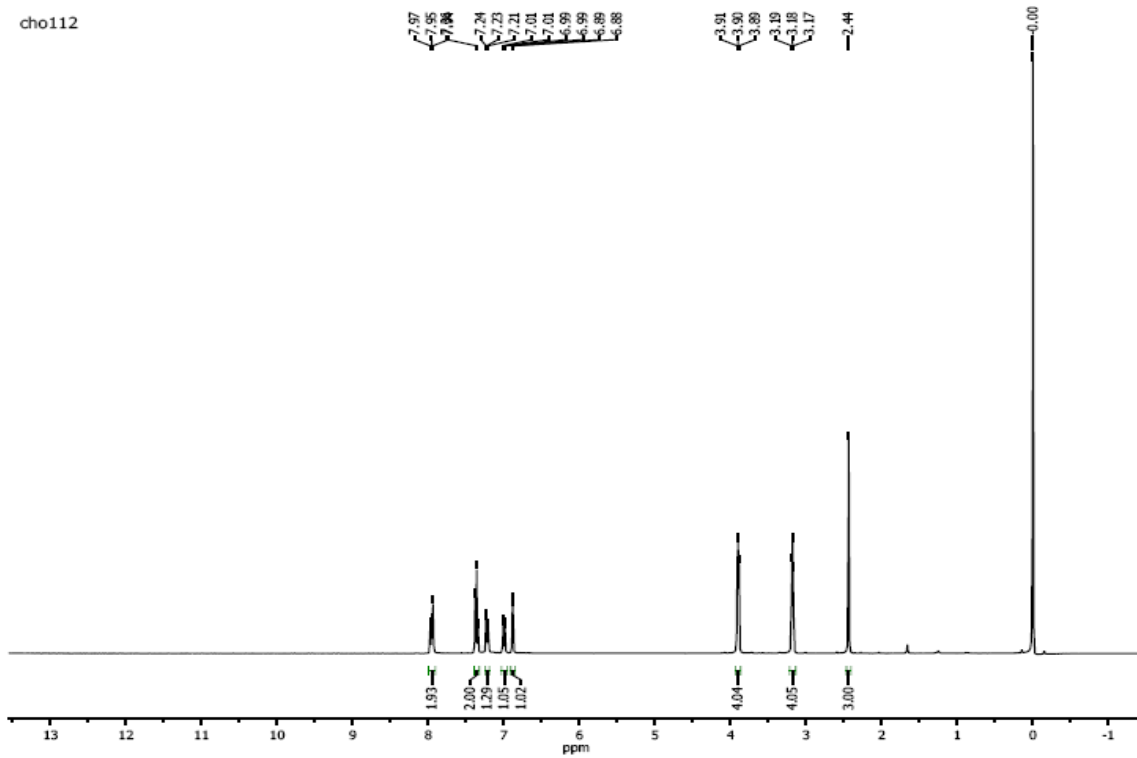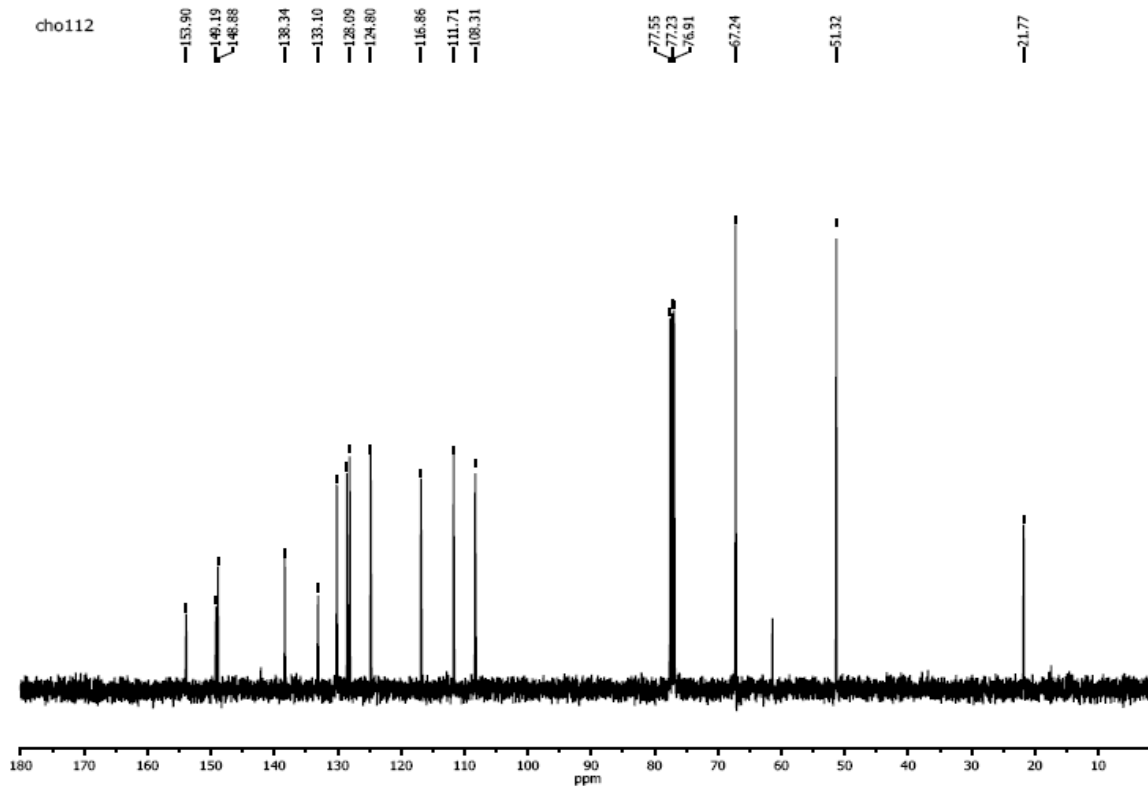

**3-Iodobenzofuran 9{21}**

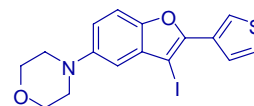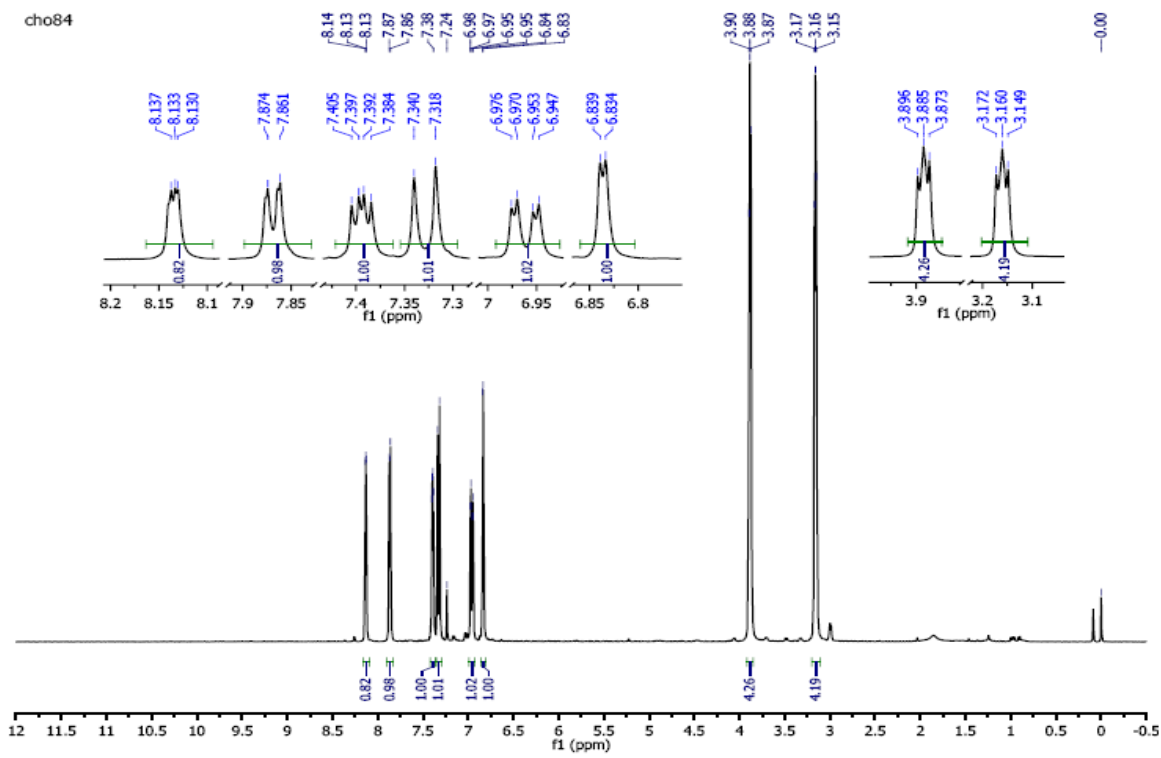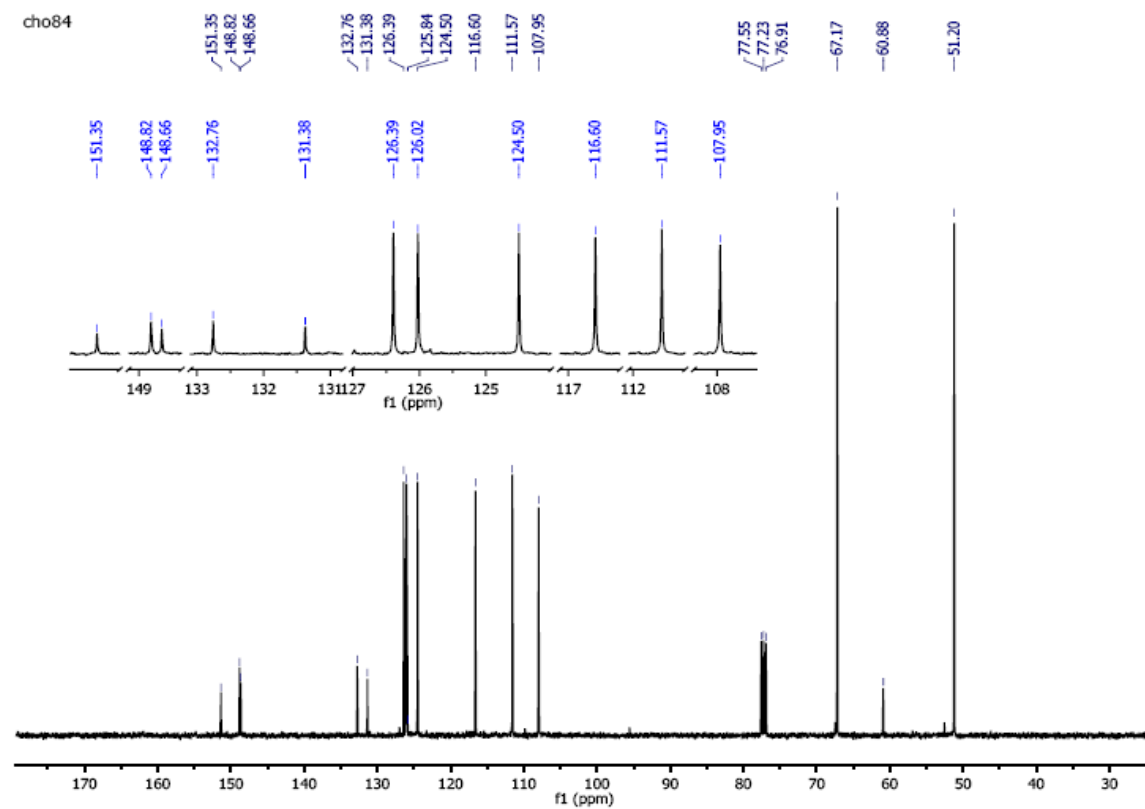

3-Iodobenzofuran 9 {23}

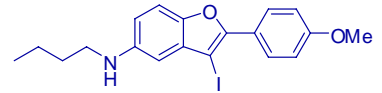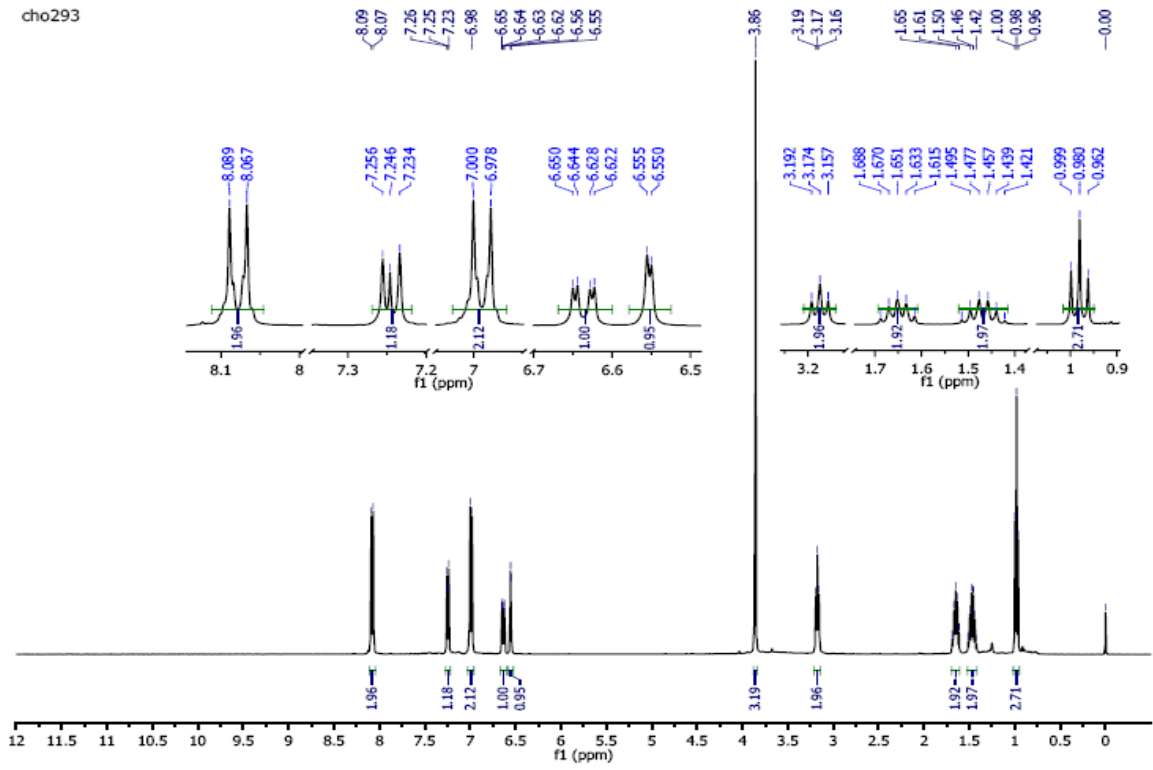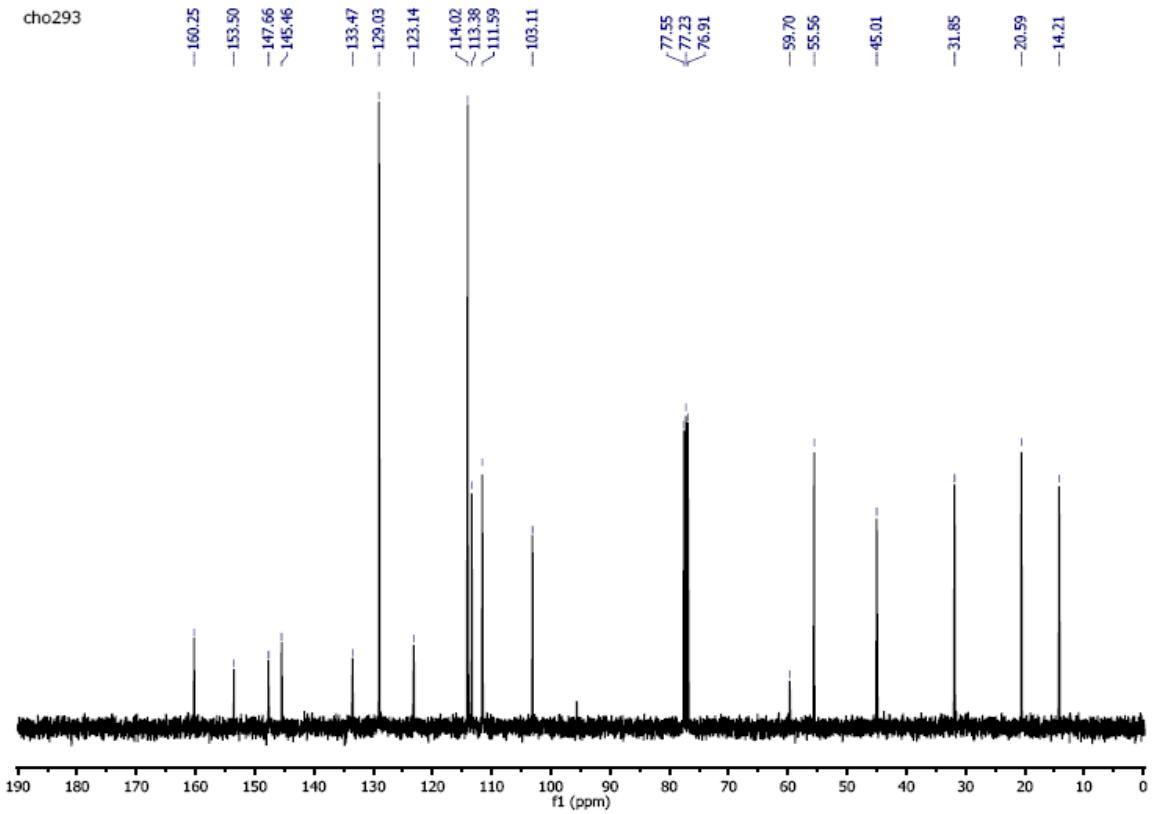

2,3,5-Trisubstituted benzo[b]furan 14{6}

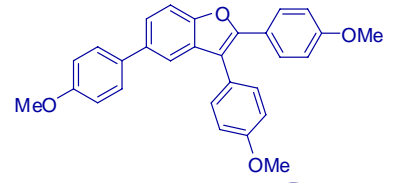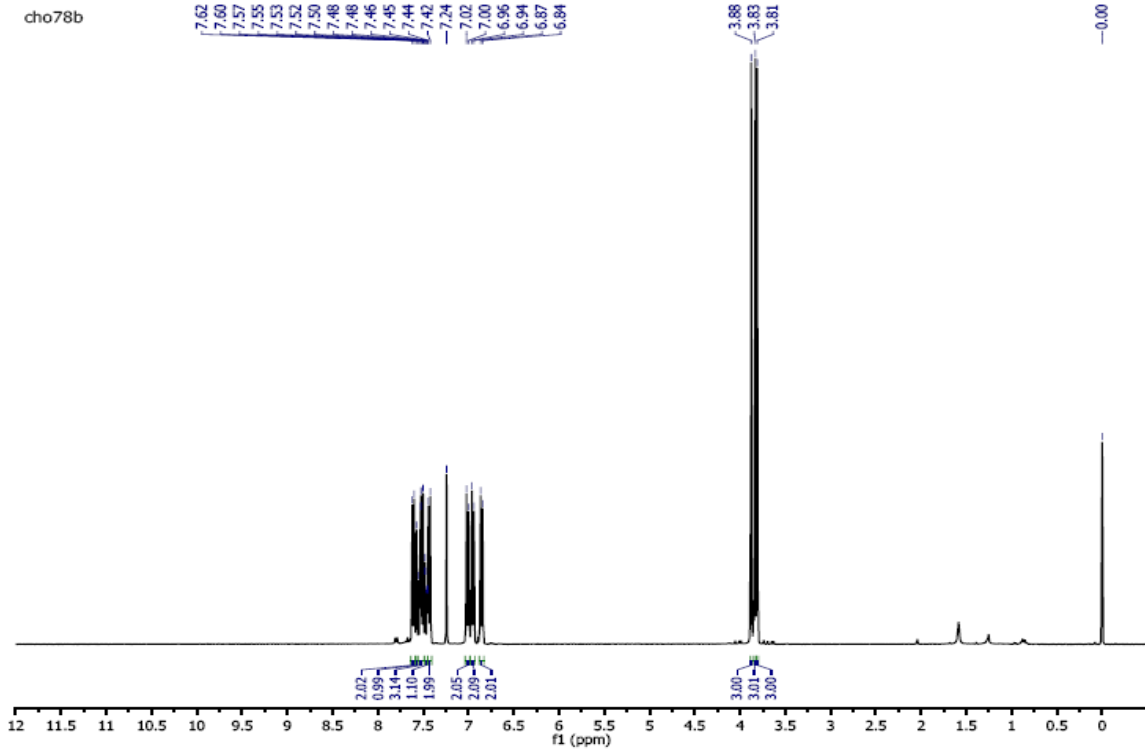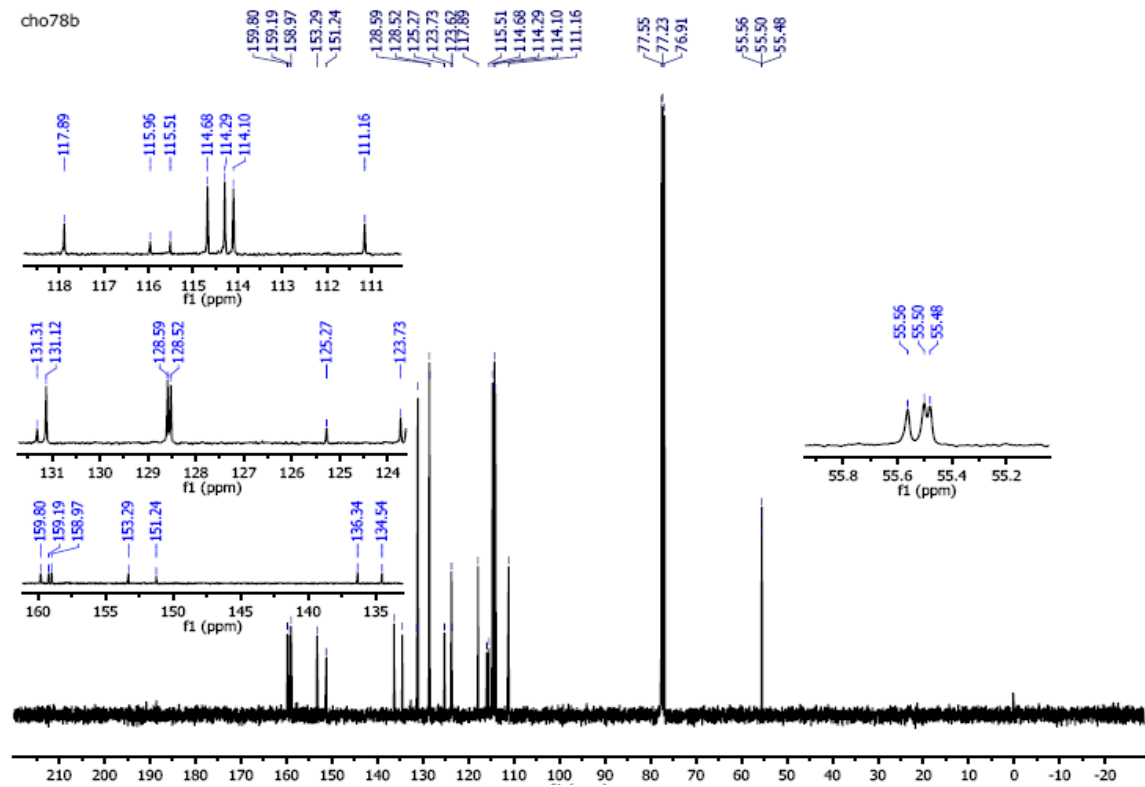



2,3,5-Trisubstituted benzo[*b*]furan 14{22}

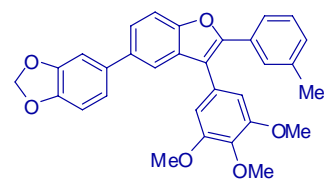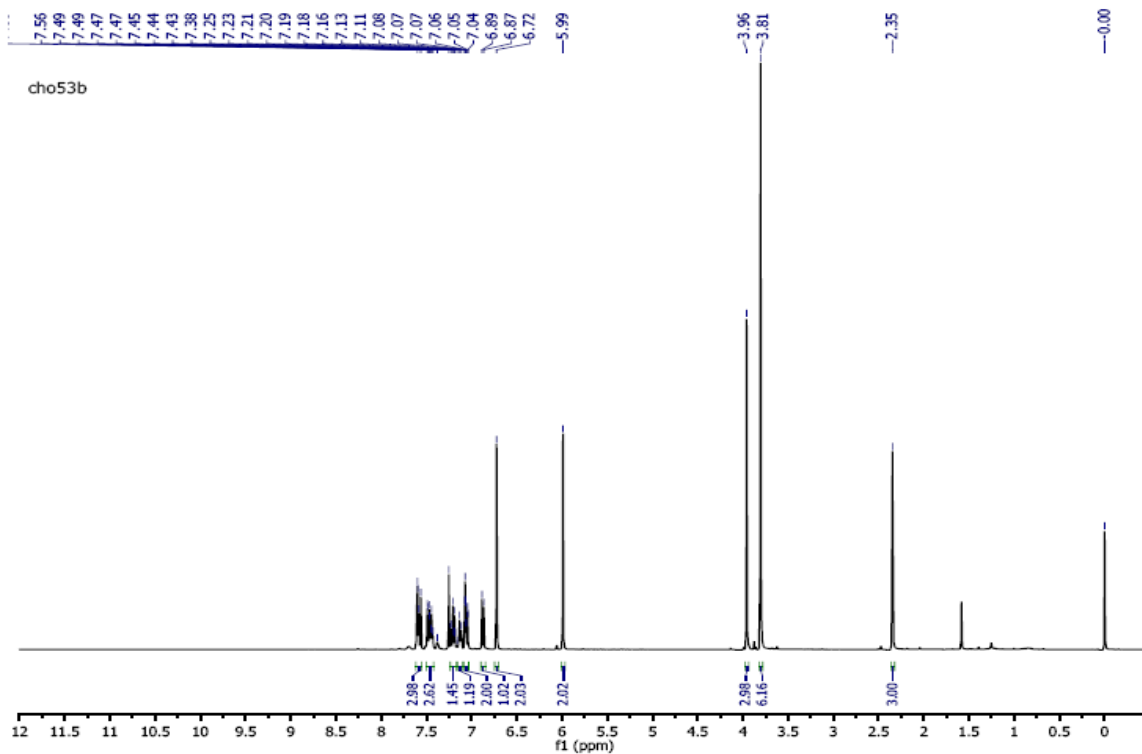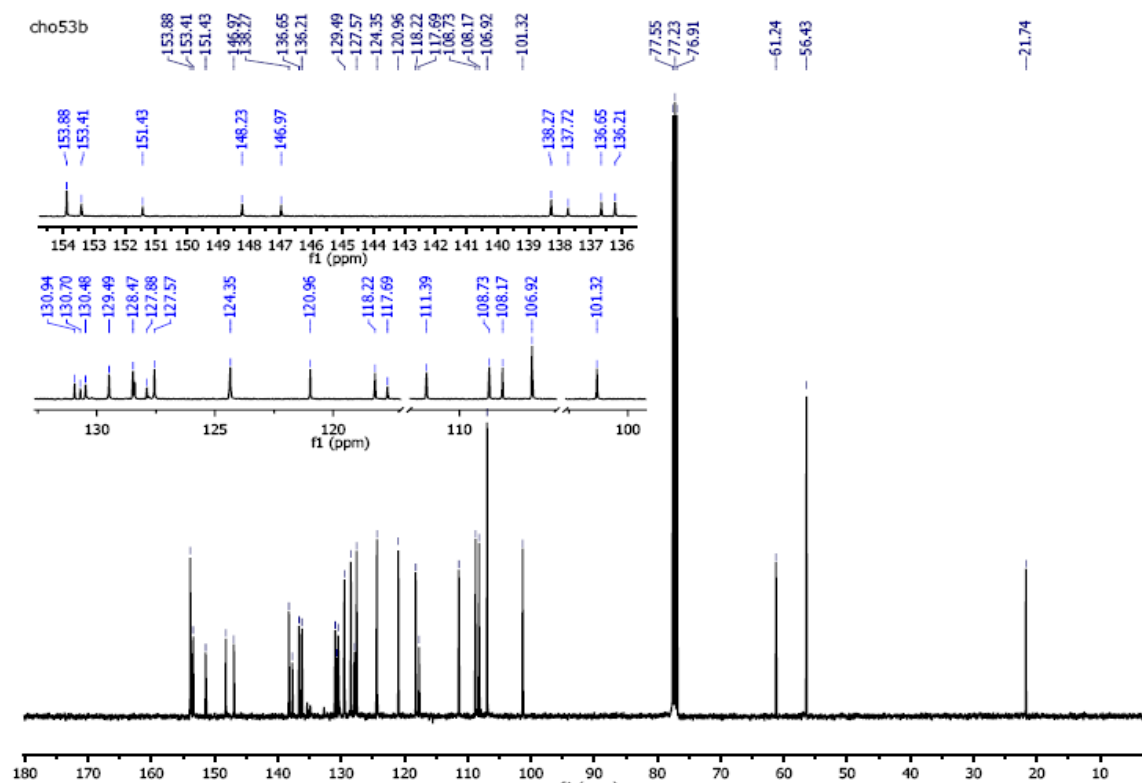

2,3,5-Trisubstituted benzo[*b*]furan 14{24}

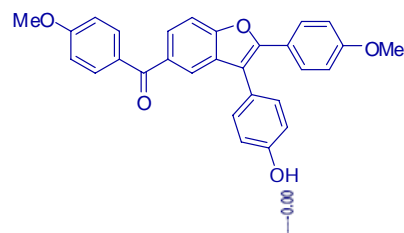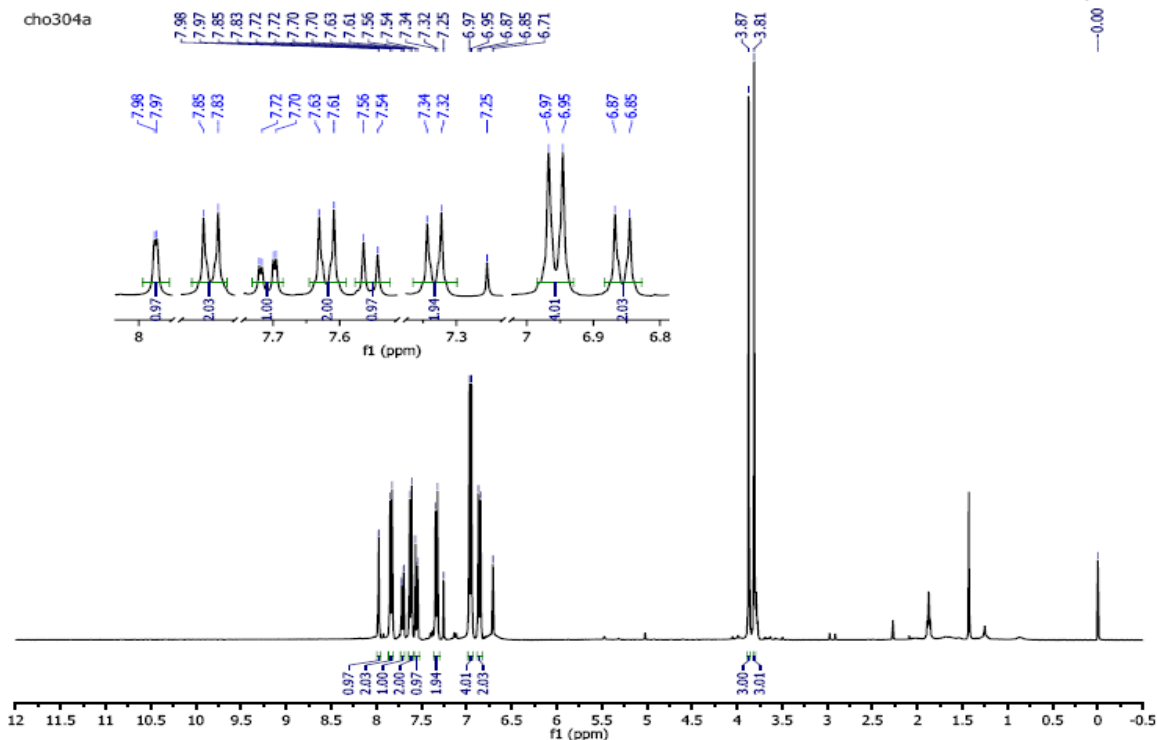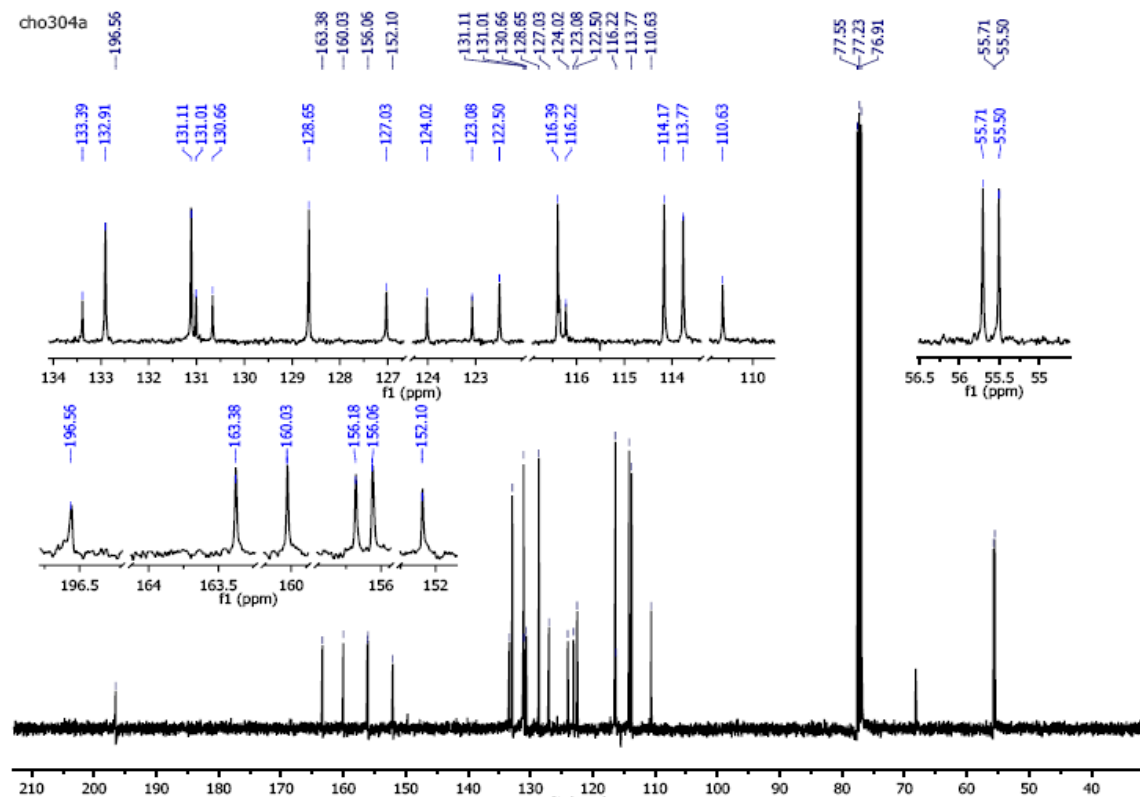

2,3,5-Trisubstituted benzo[b]furan 14{25}

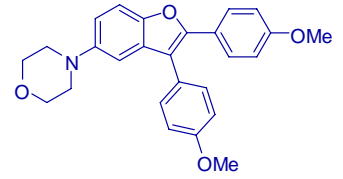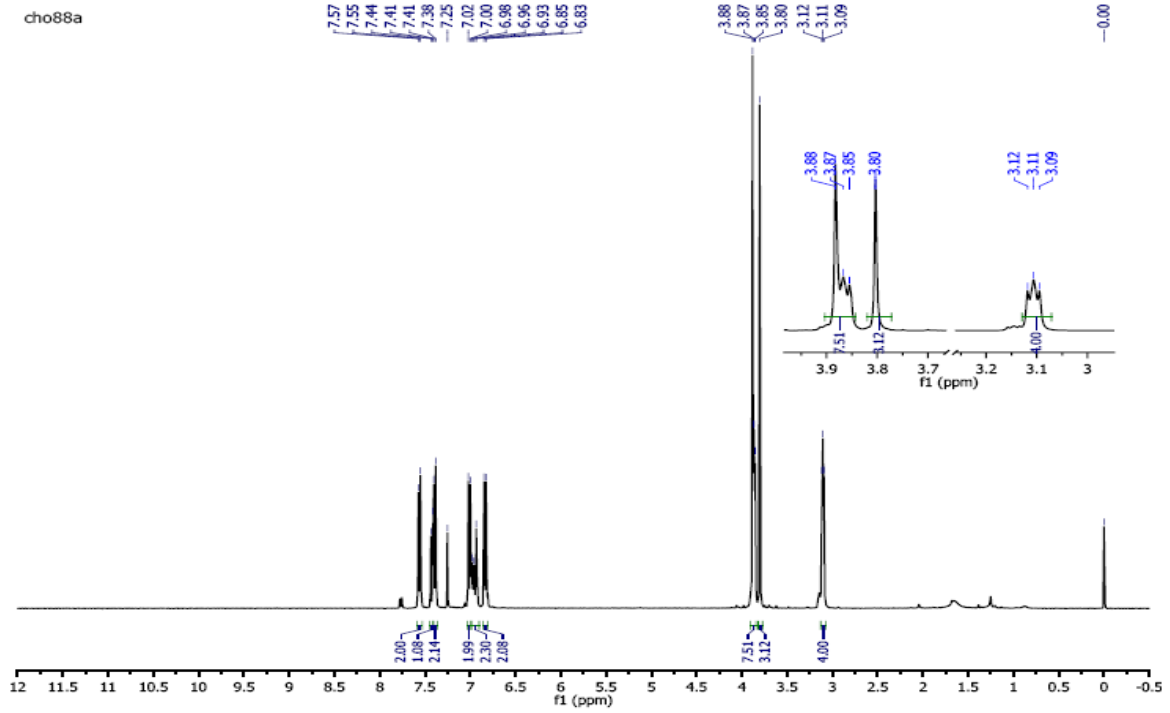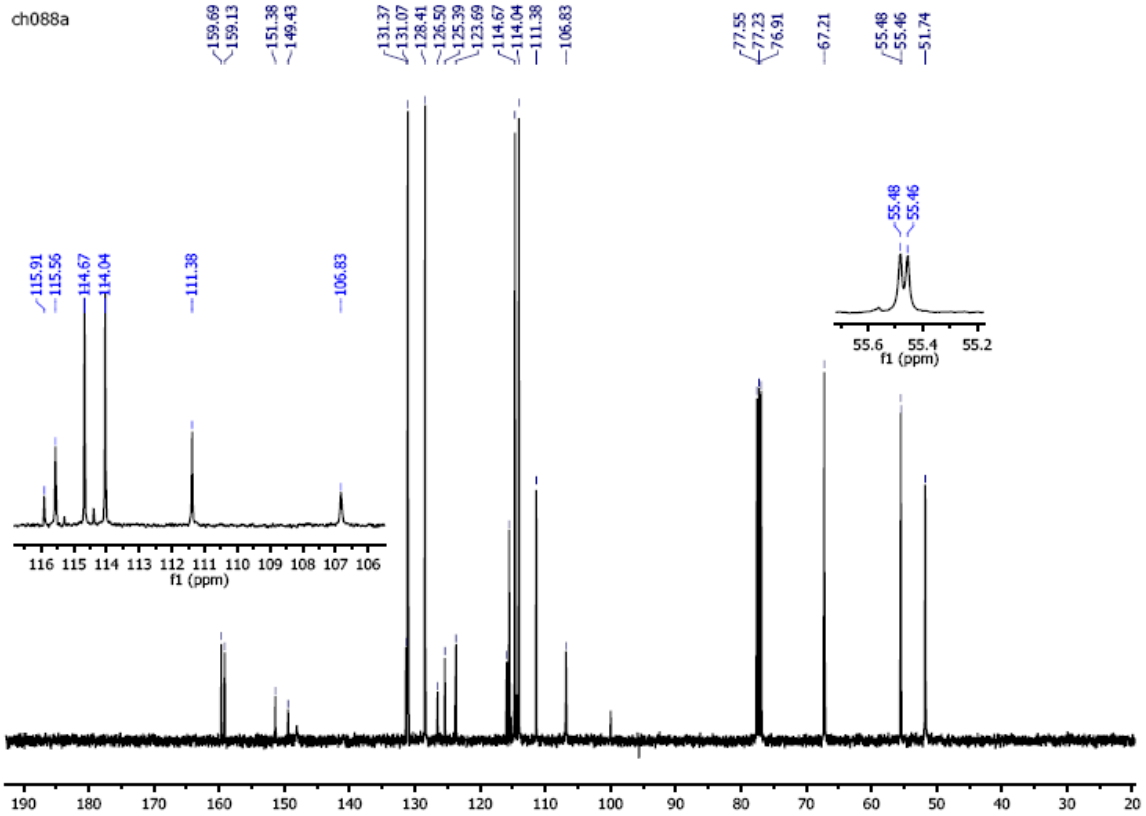

2,3,5-Trisubstituted benzo[b]furan 14{27}

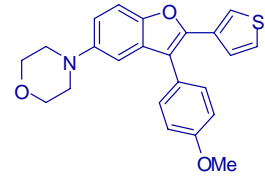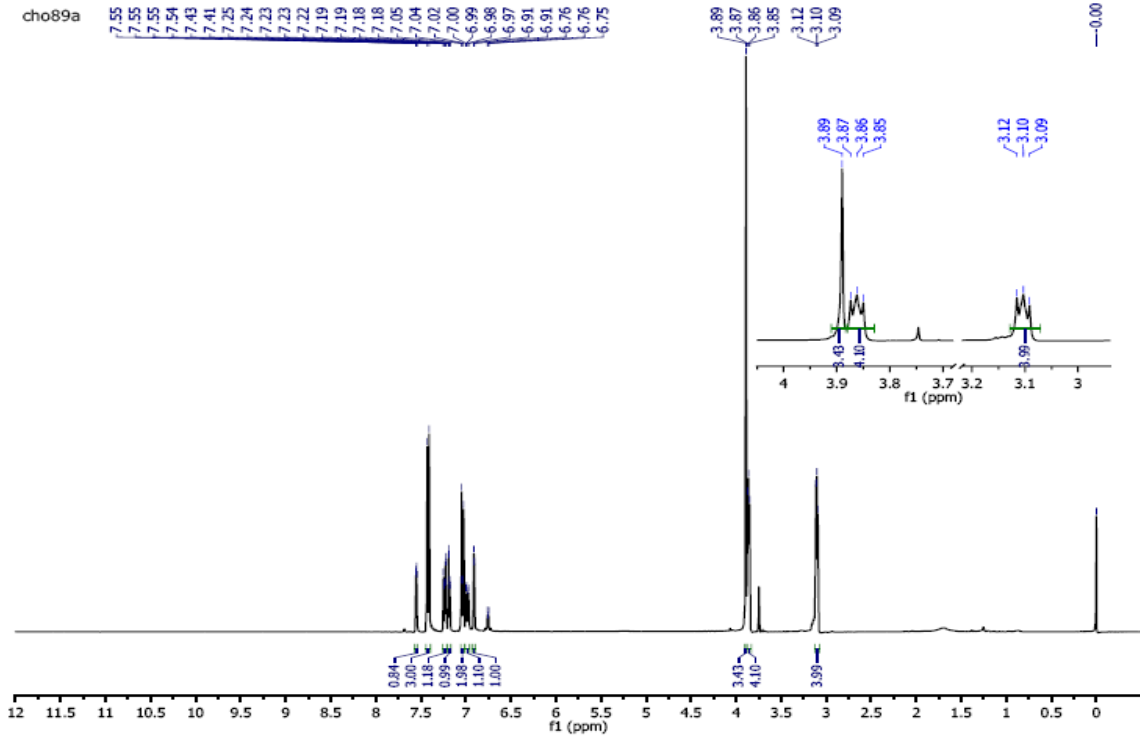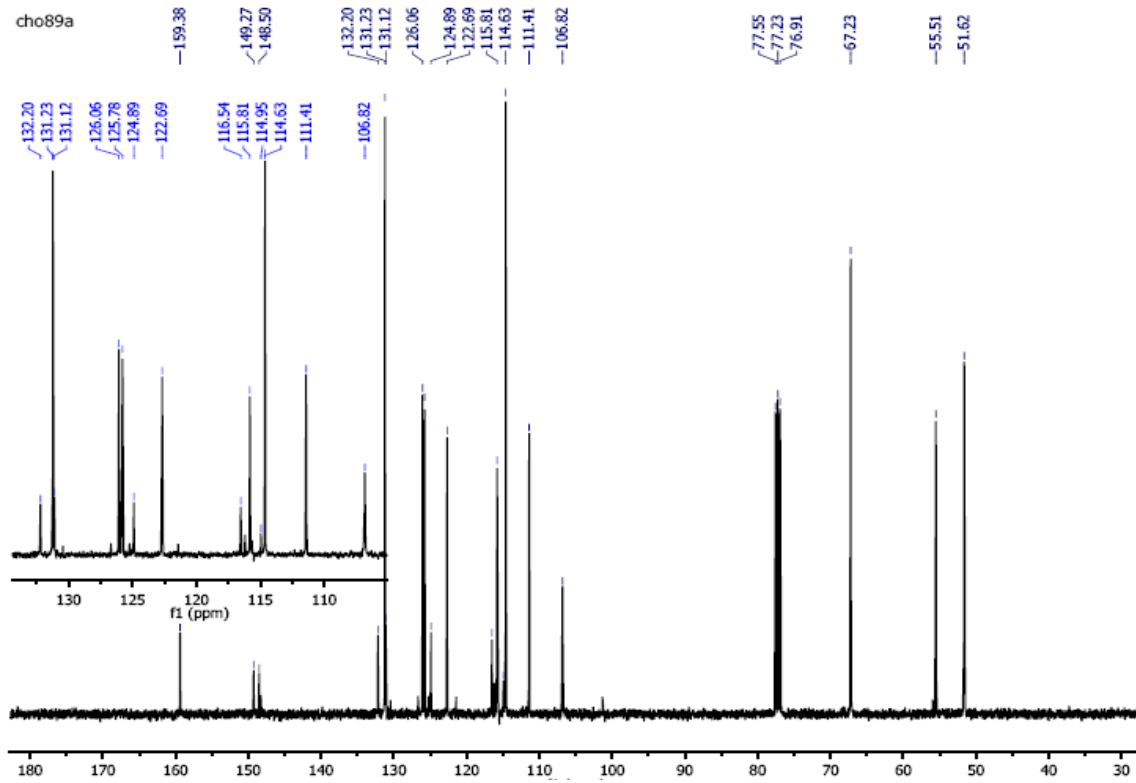

2,3,5-Trisubstituted benzo[*b*]furan 14{28}

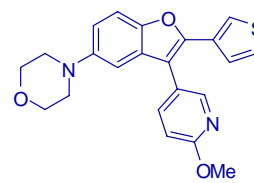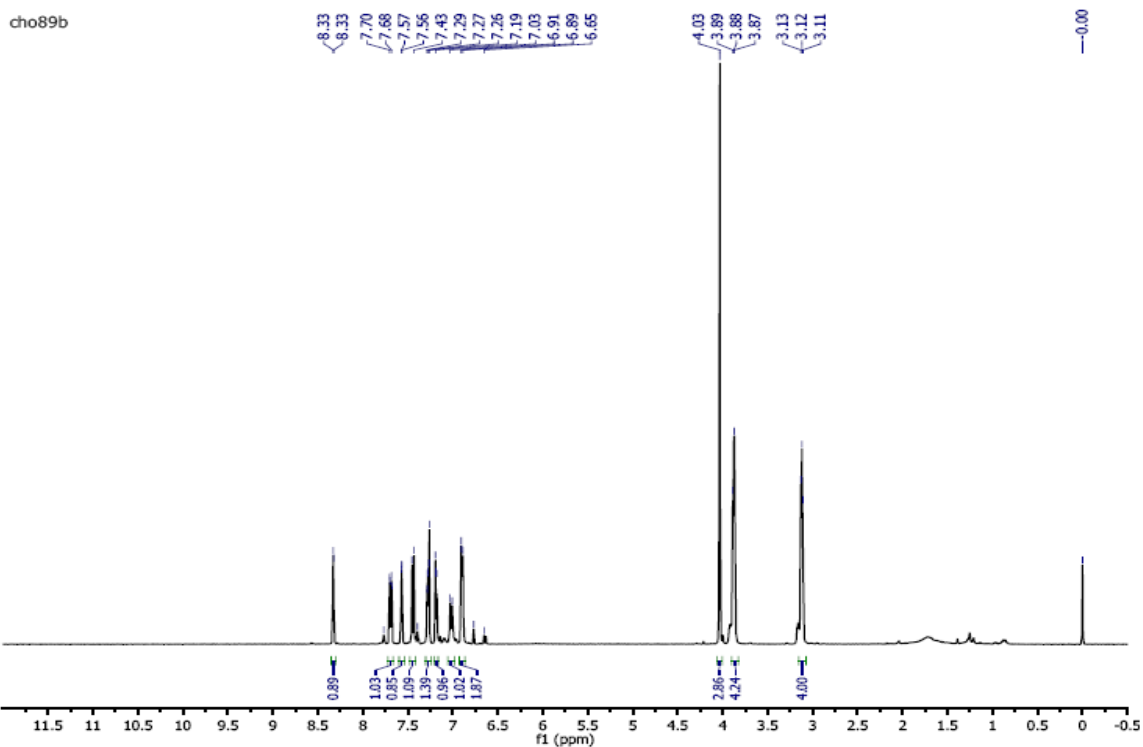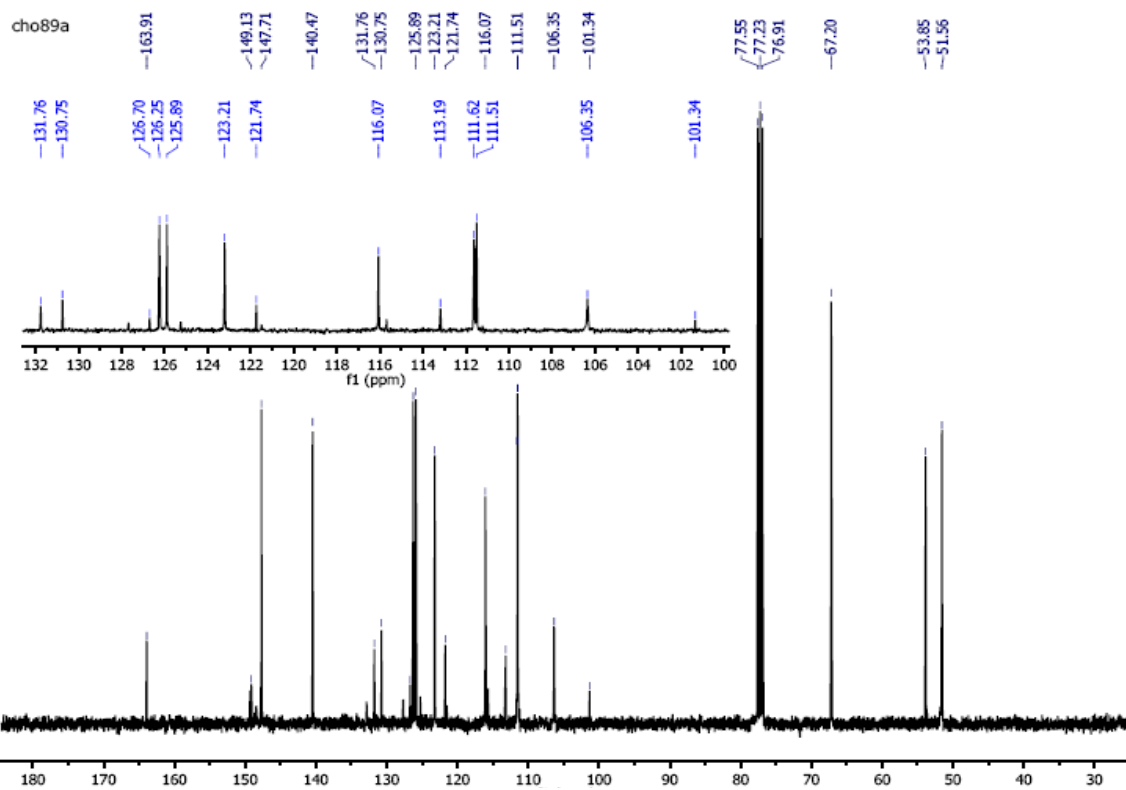

2,3,5-Trisubstituted benzo[b]furan 14{31}

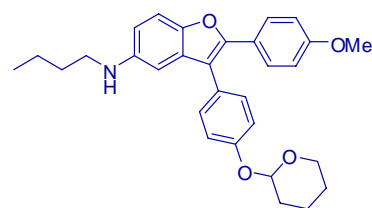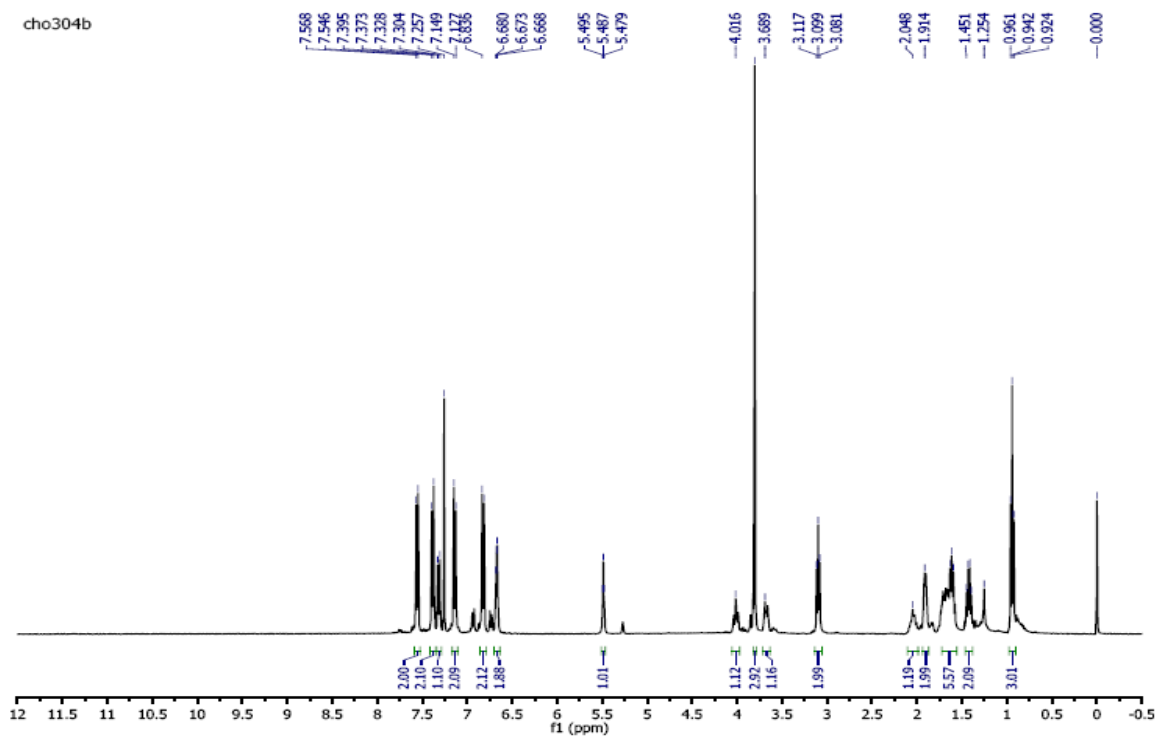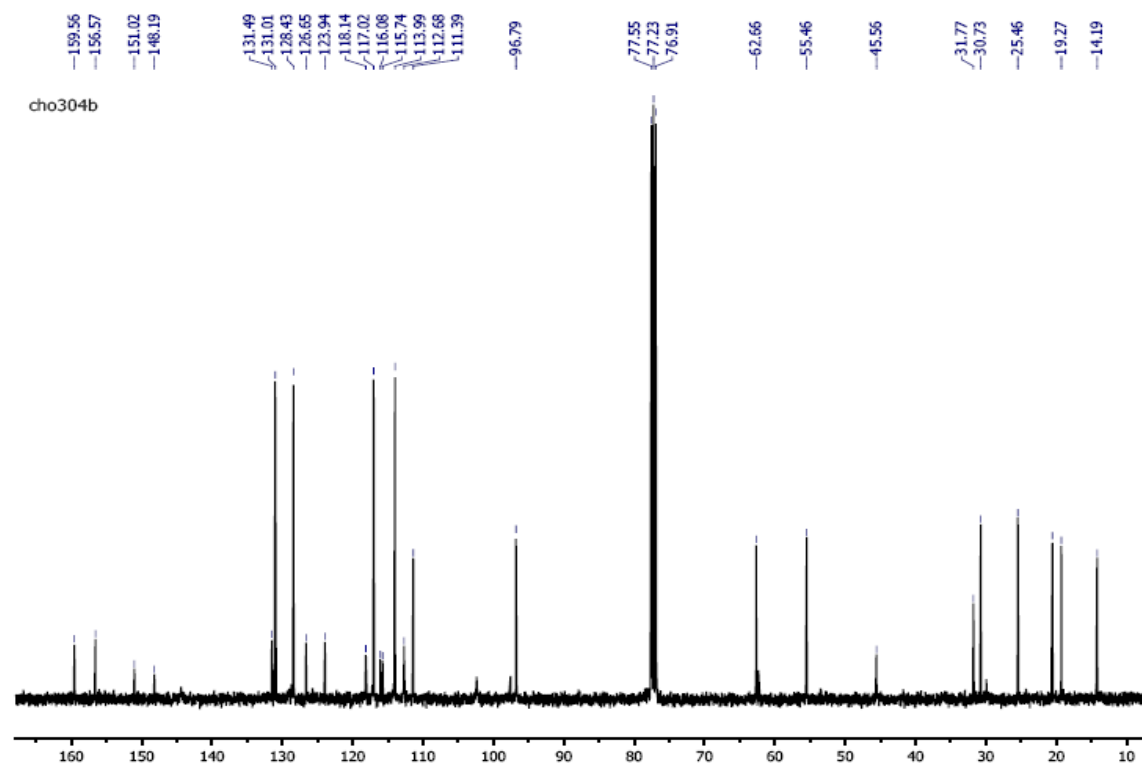

2,3,5-Trisubstituted benzo[b]furan 14{34}

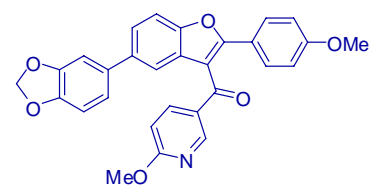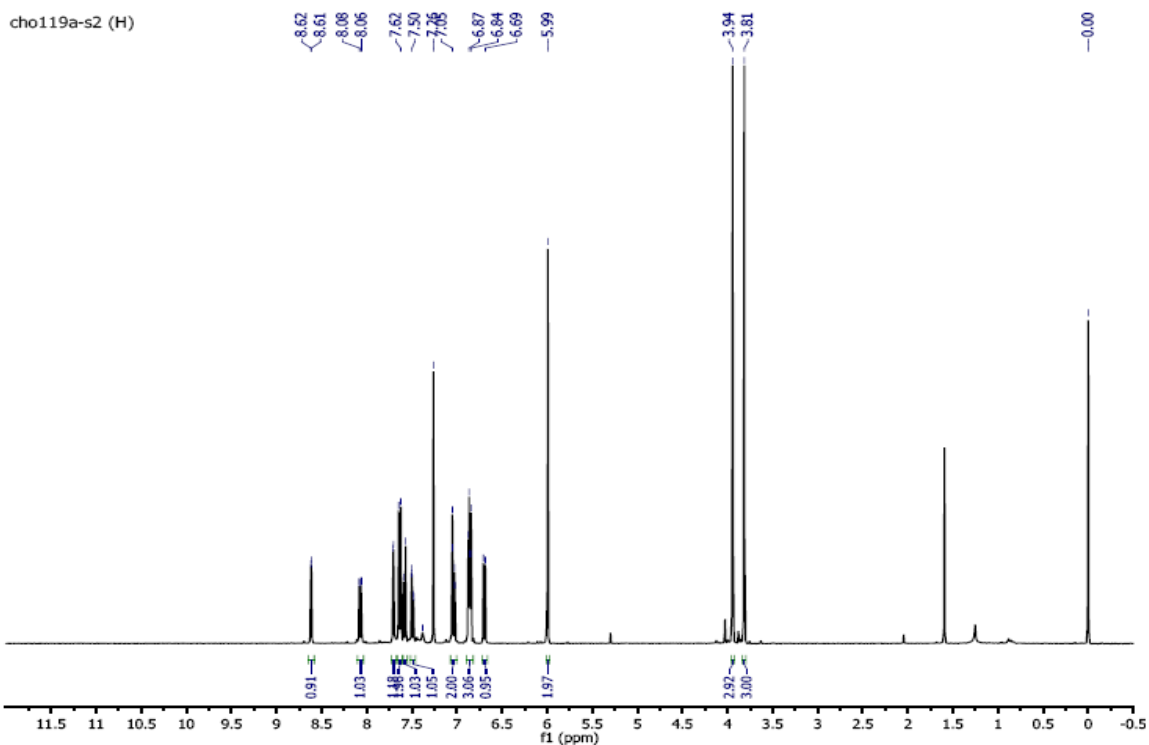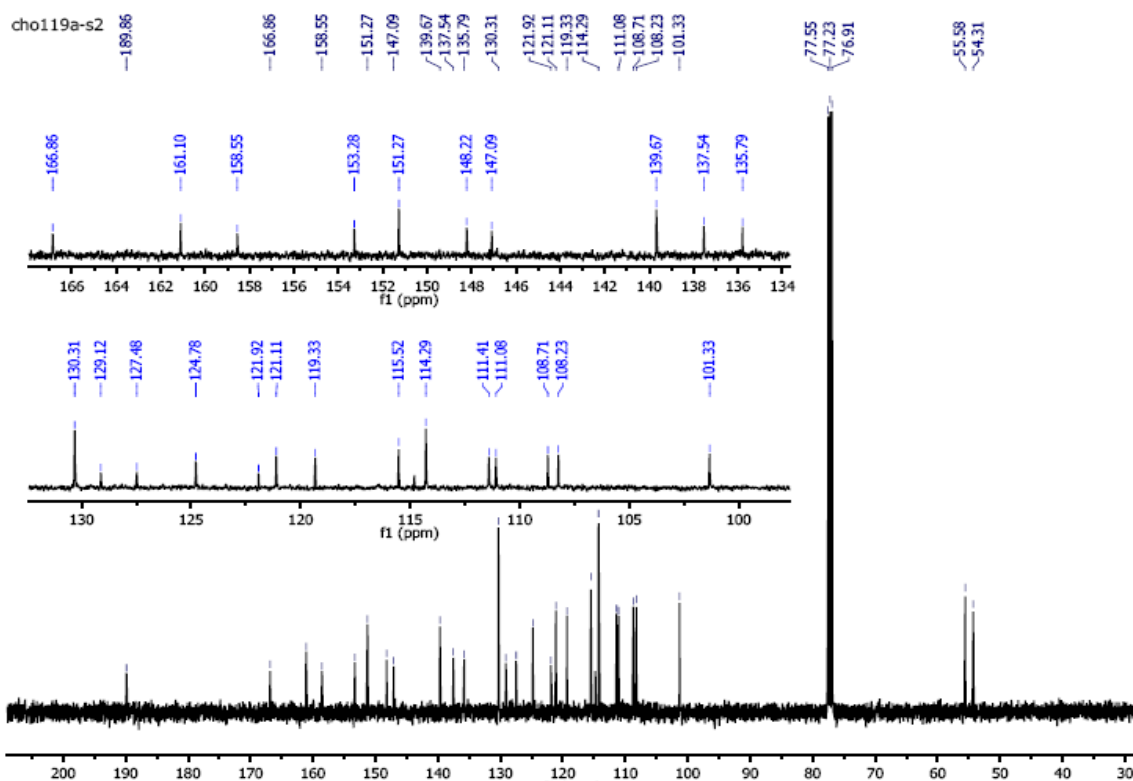

2,3,5-Trisubstituted benzo[b]furan 14{62}

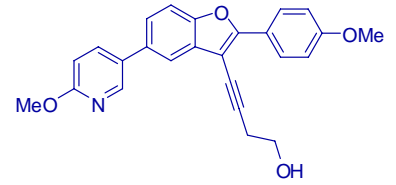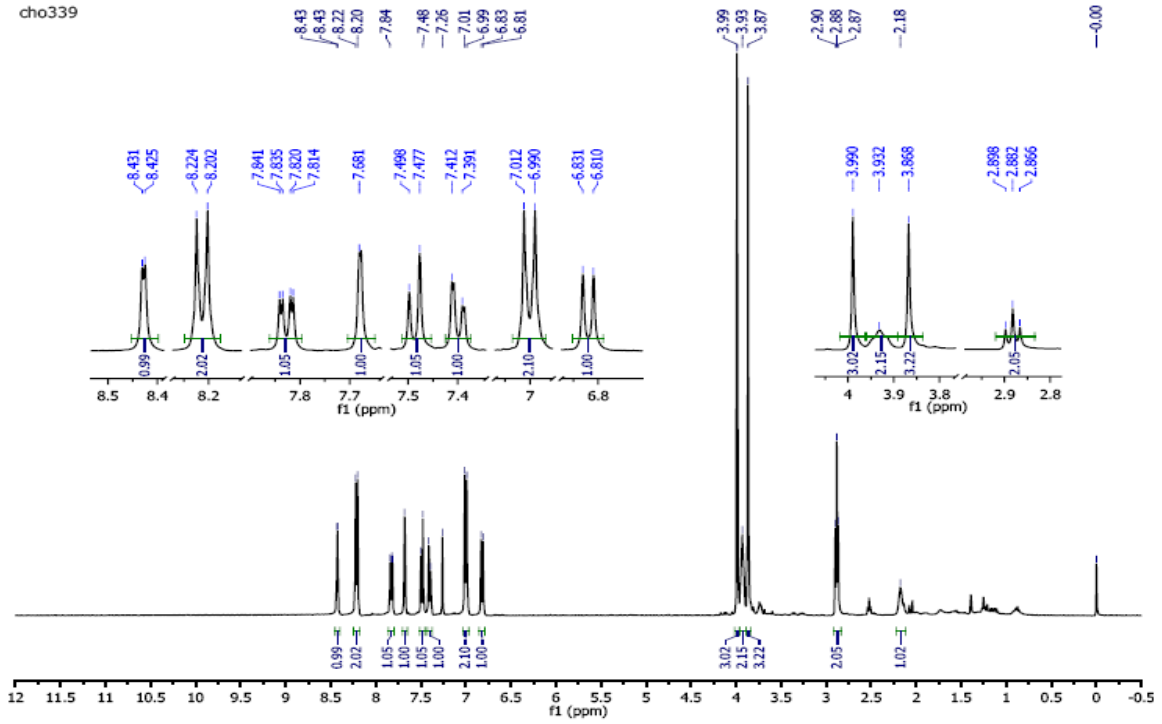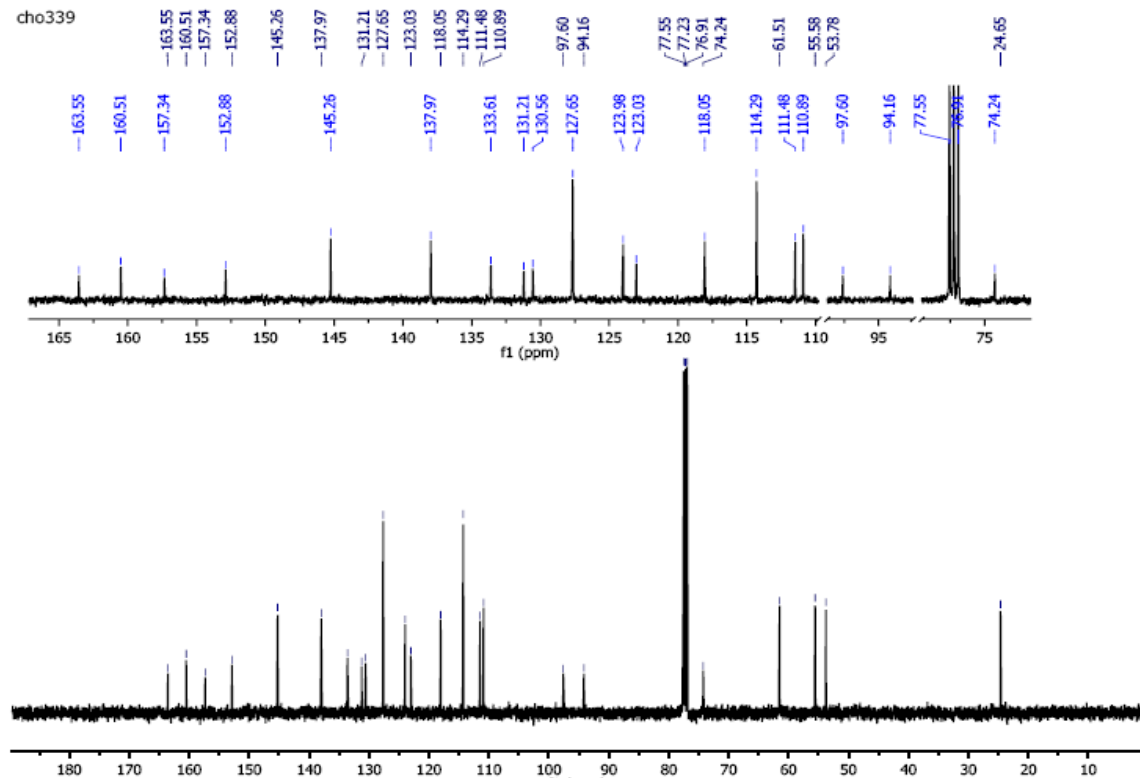



2,3,5-Trisubstituted benzo[*b*]furan 14{67}

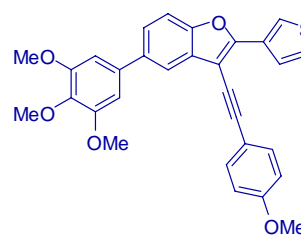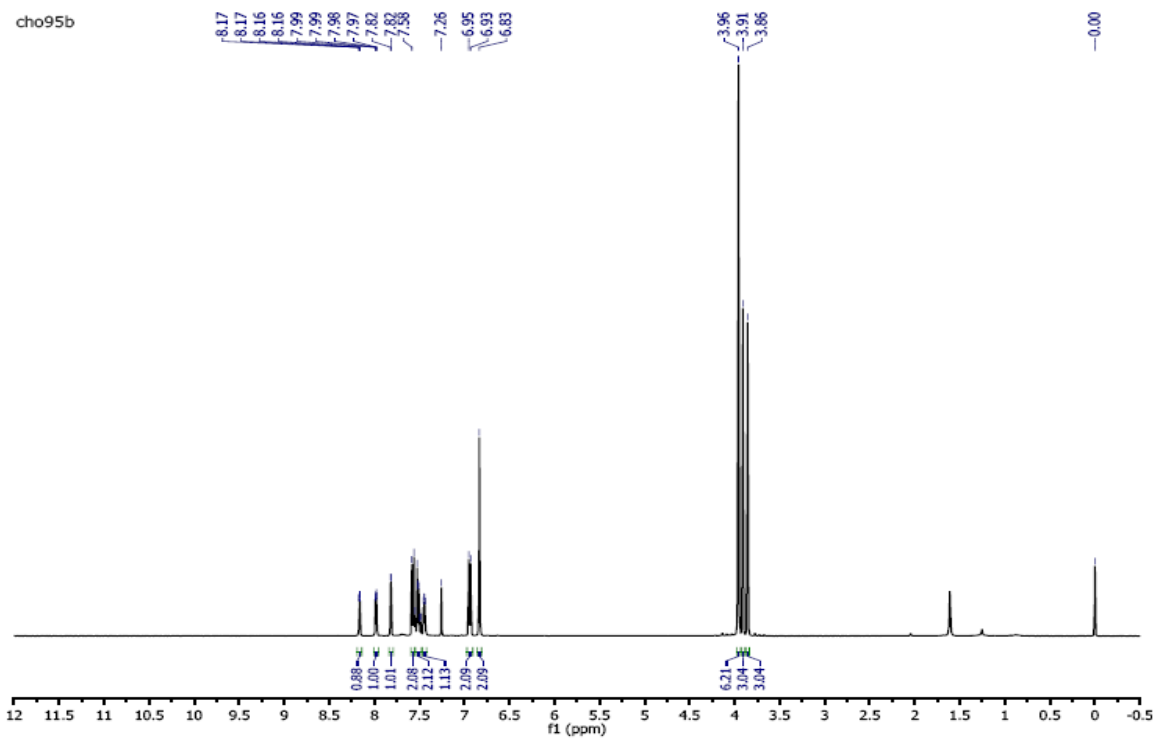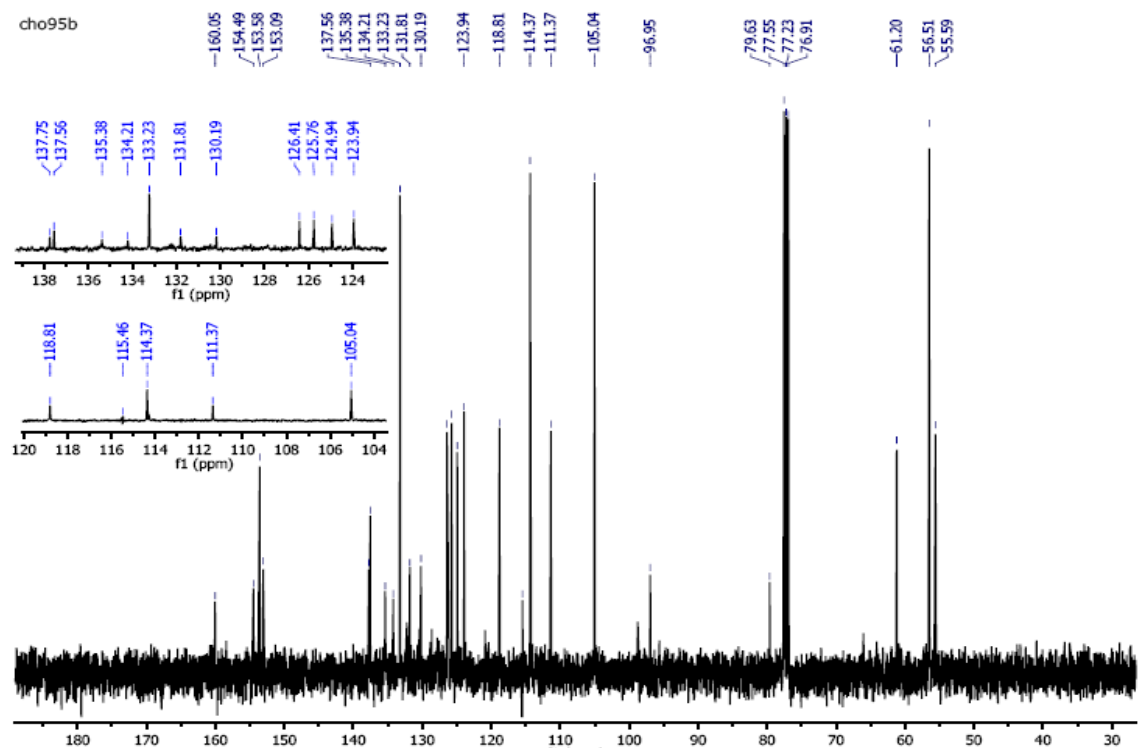

2,3,5-Trisubstituted benzo[b]furan 14{75}

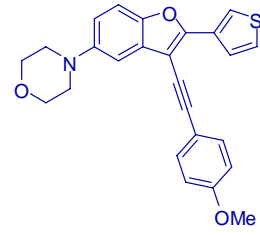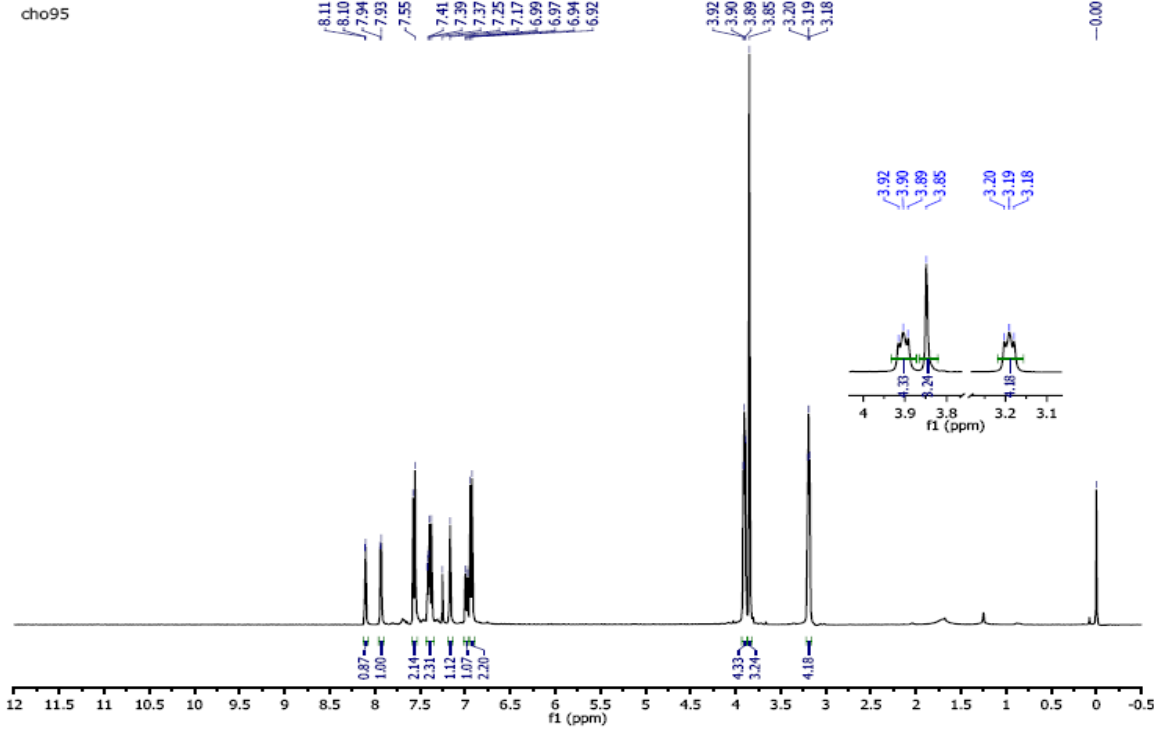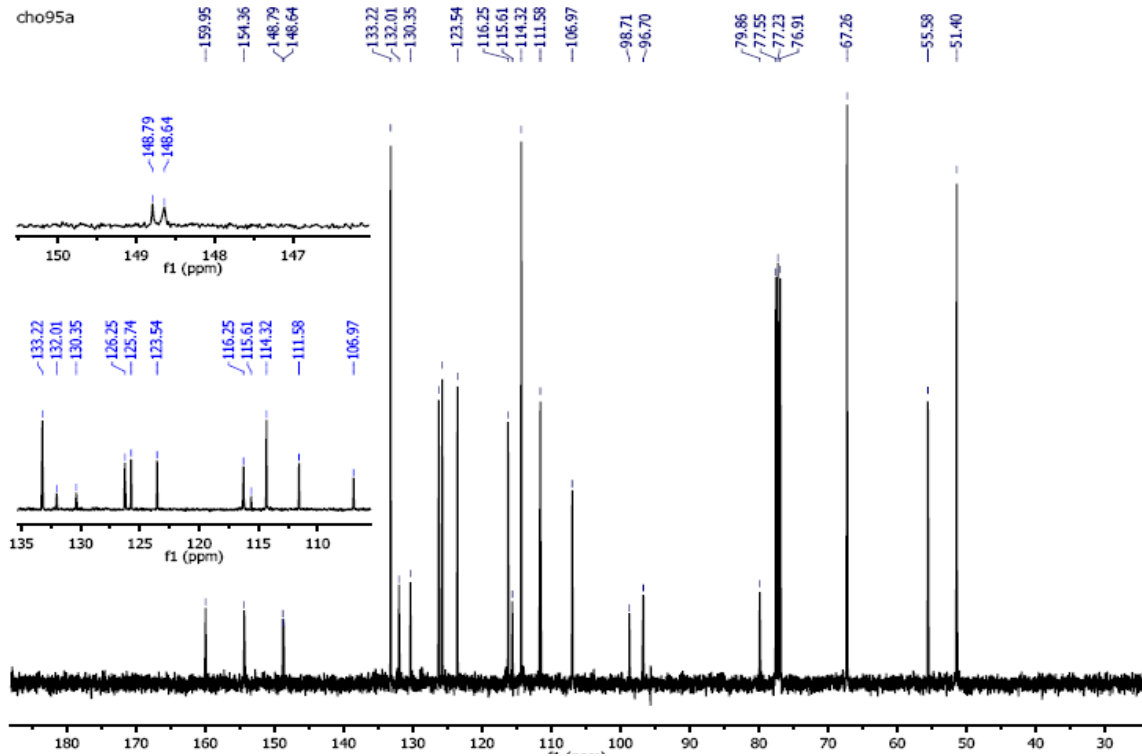

2,3,5-Trisubstituted benzo[b]furan 14{77}

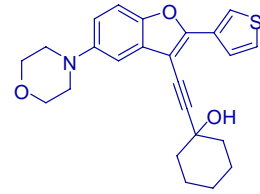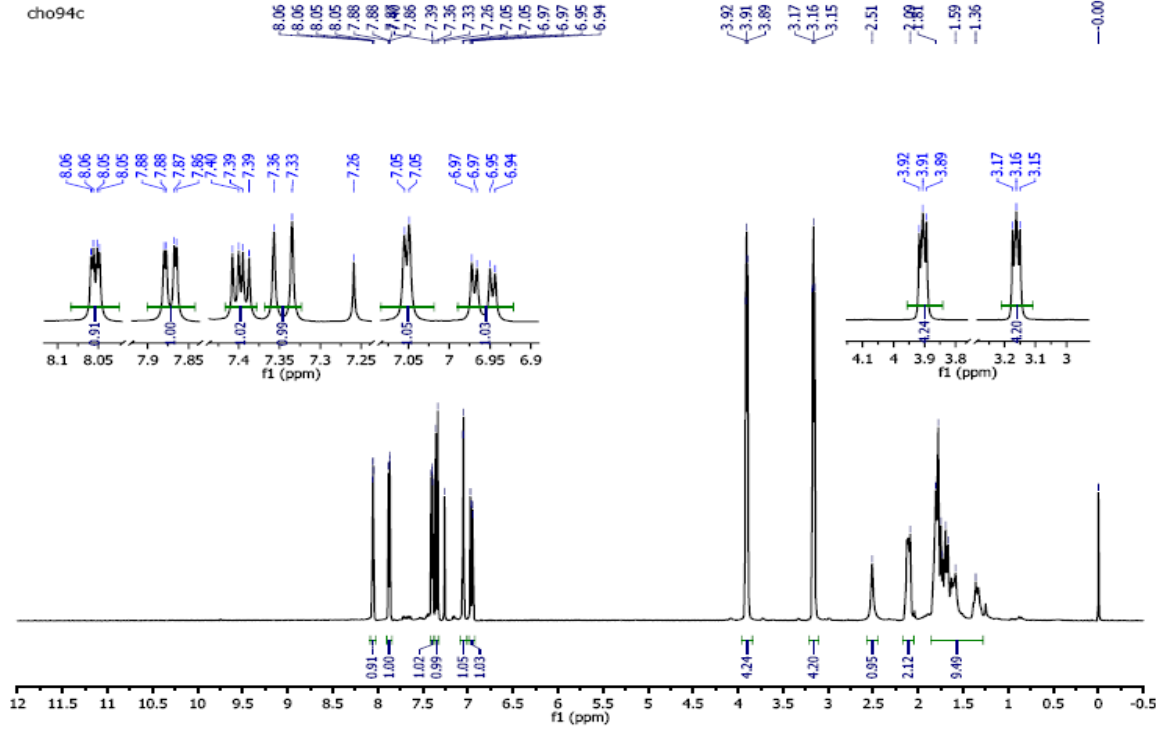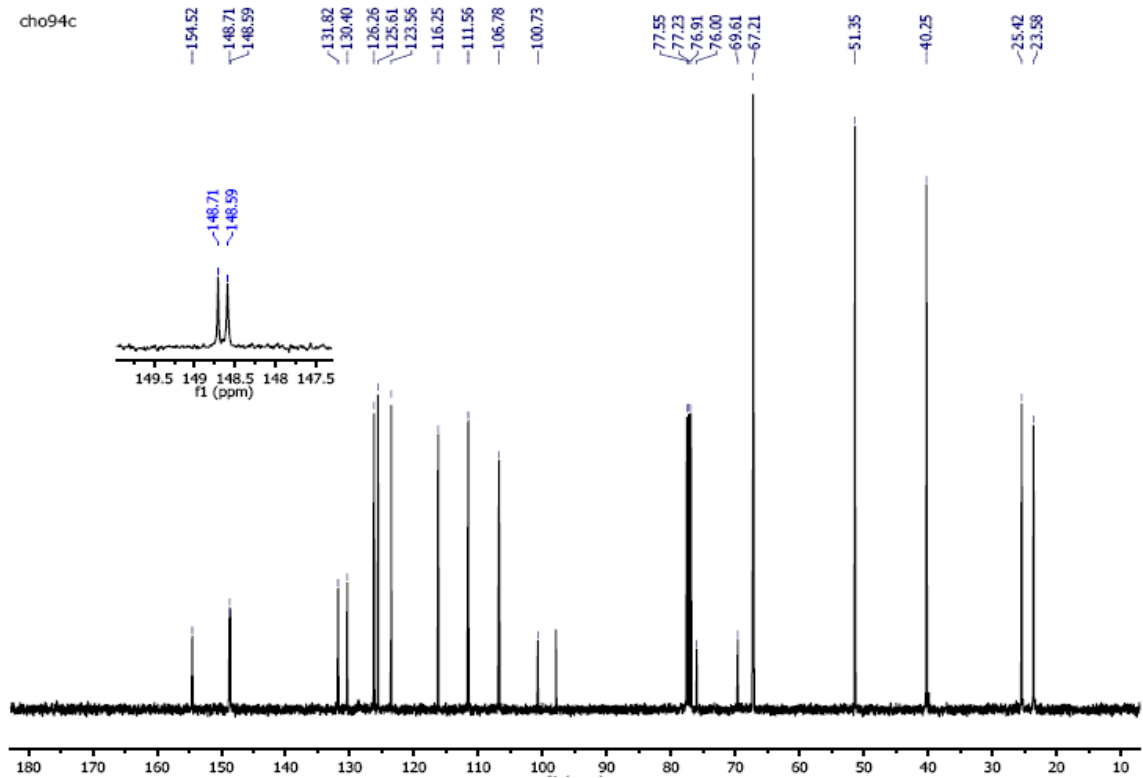

# 2,3-Disubstituted furo[b]pyridine 14{81}

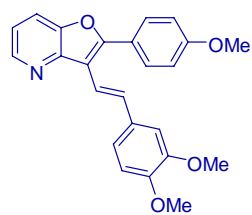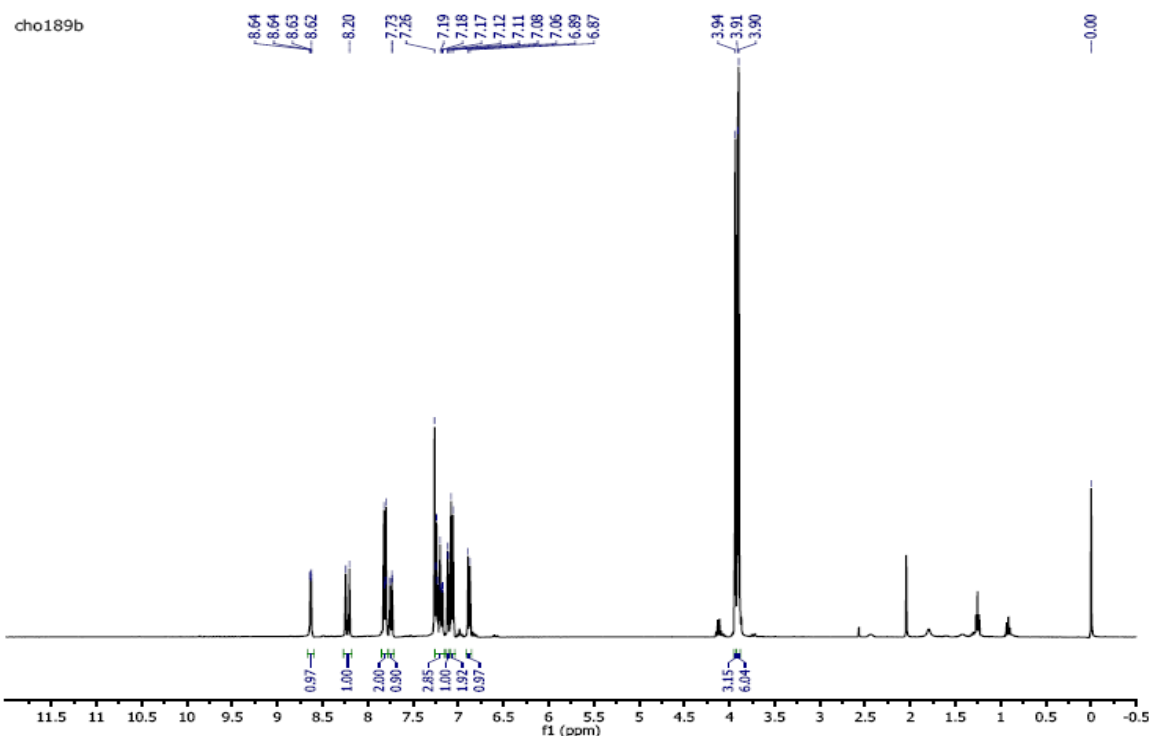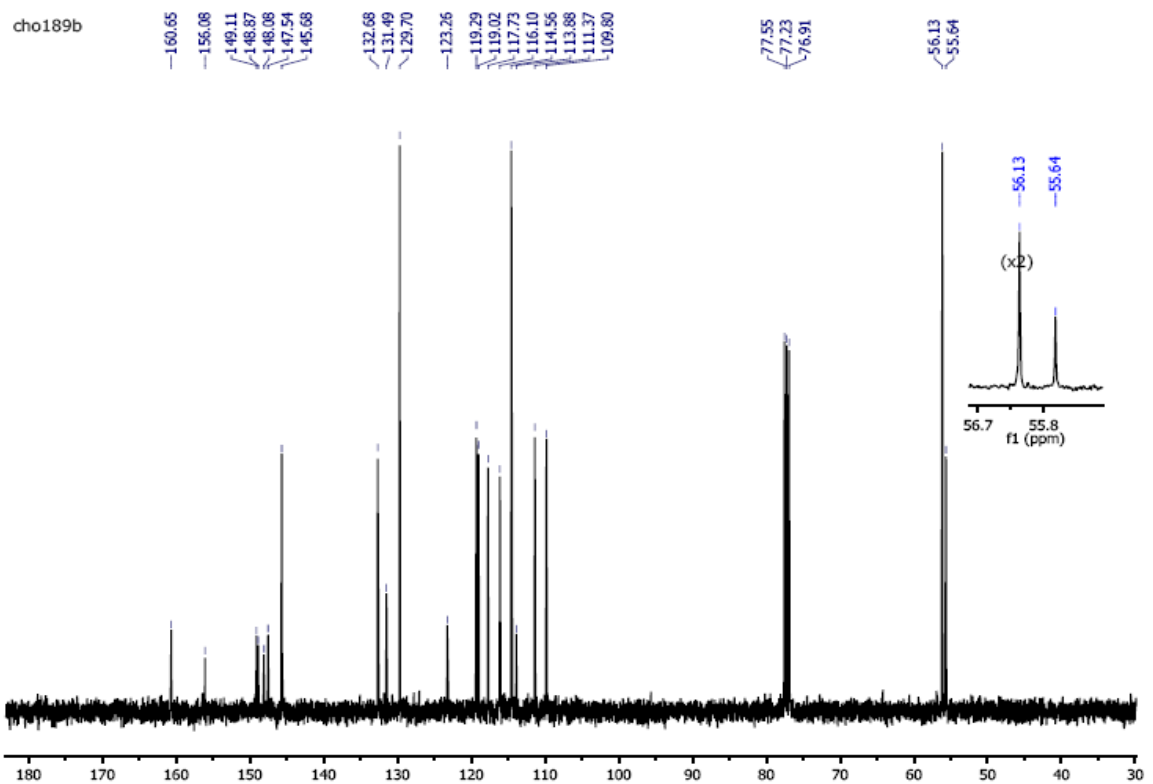

2,3,5-Trisubstituted benzo[*b*]furan 14{83}

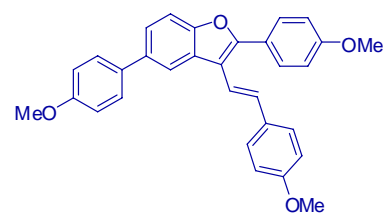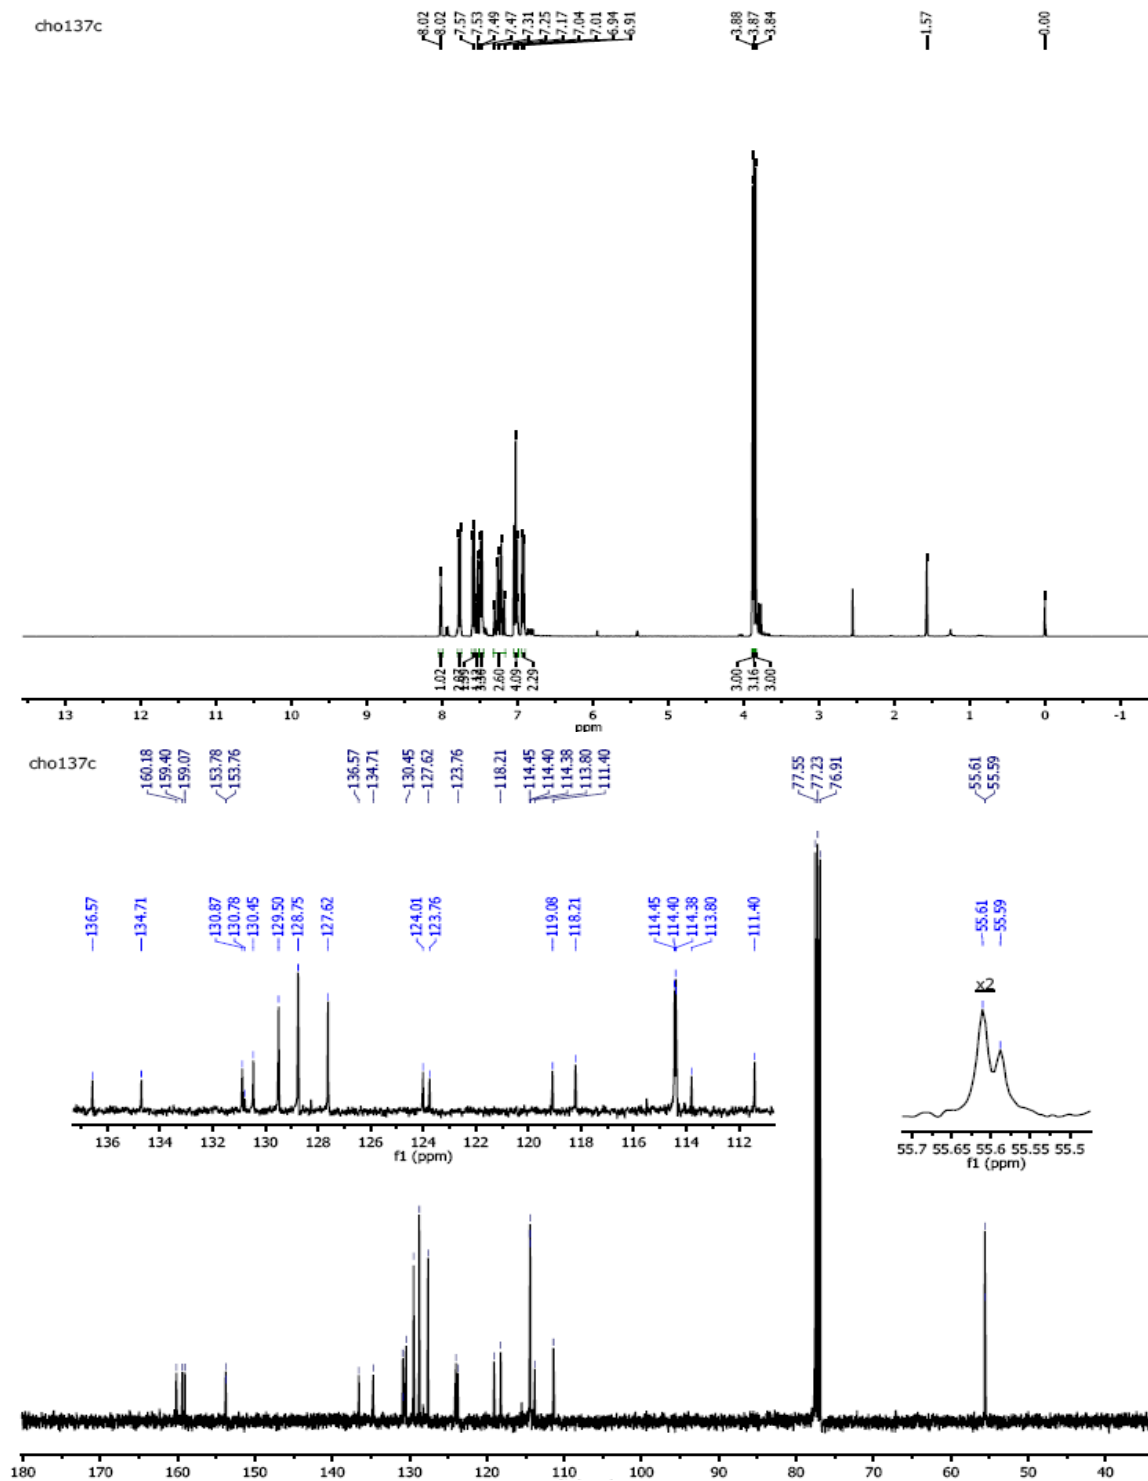

2,3,5-Trisubstituted benzo[*b*]furan 14 {85}

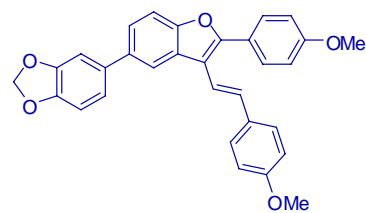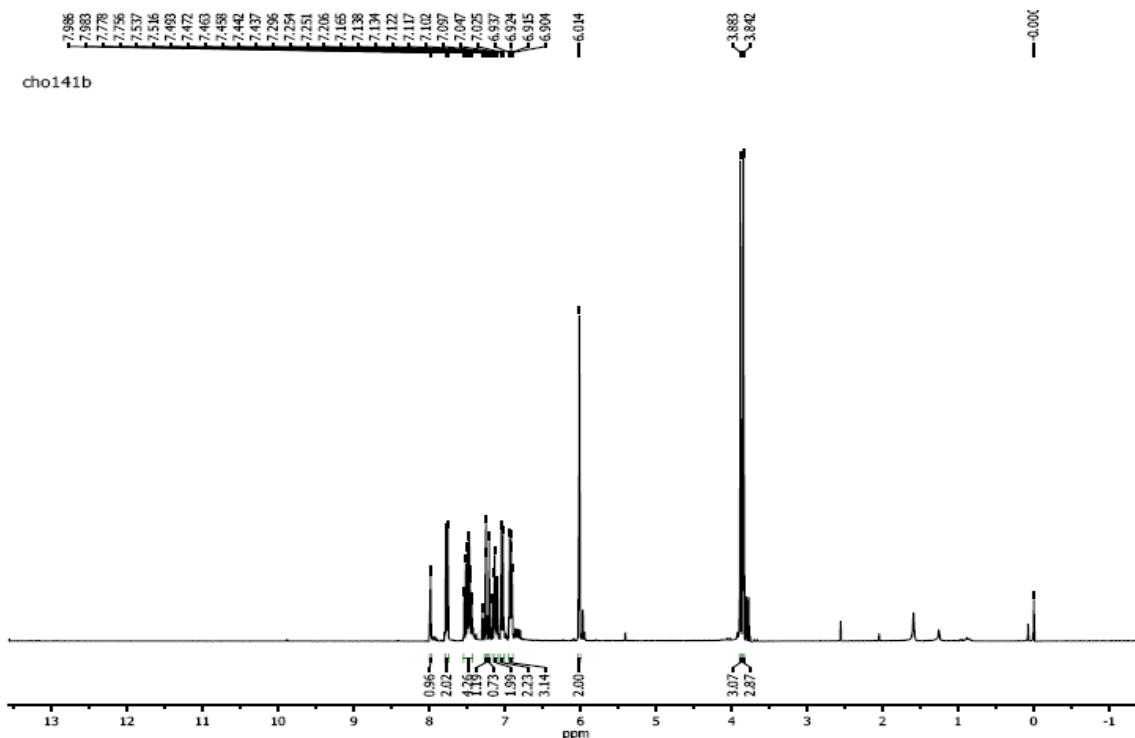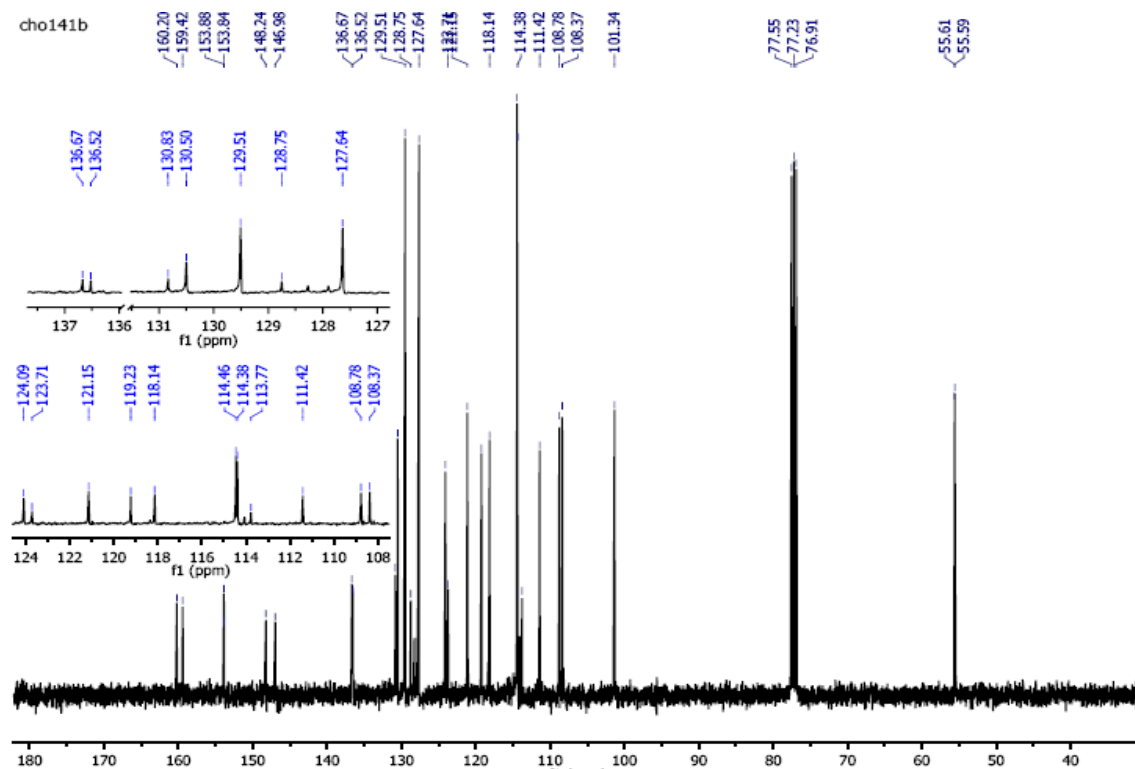

2,3,5-Trisubstituted benzo[*b*]furan 14{92}

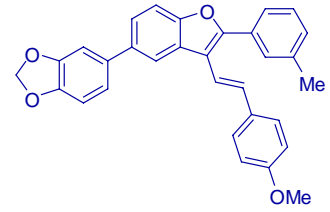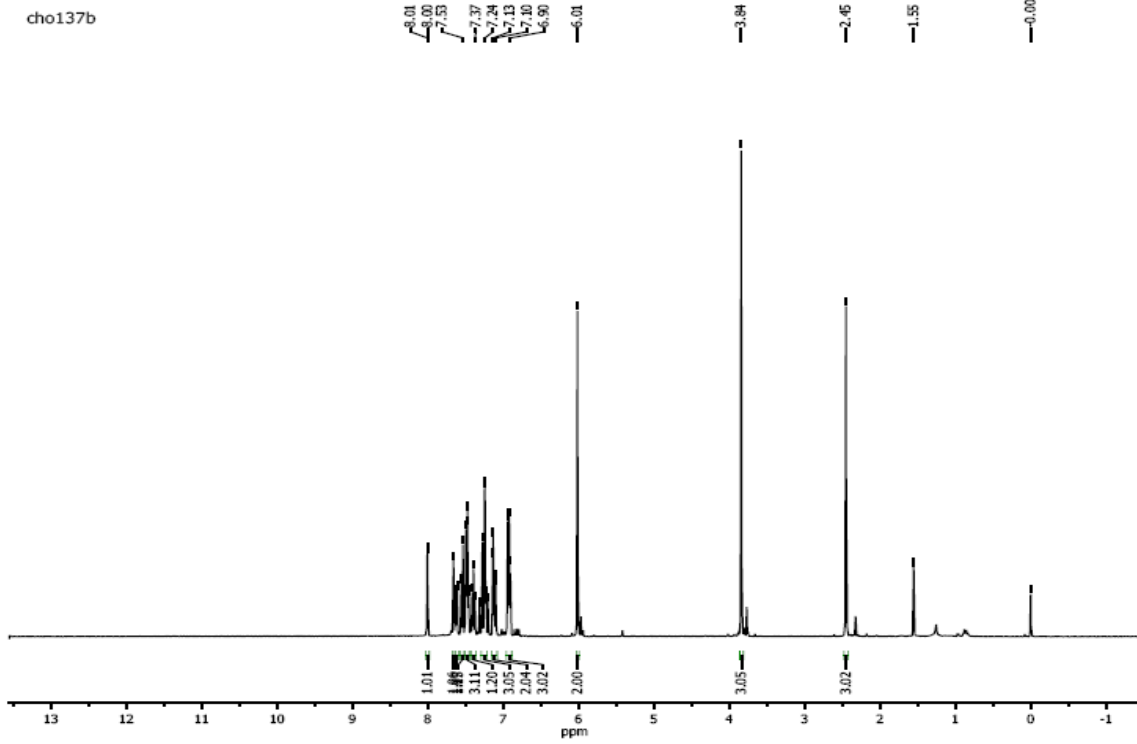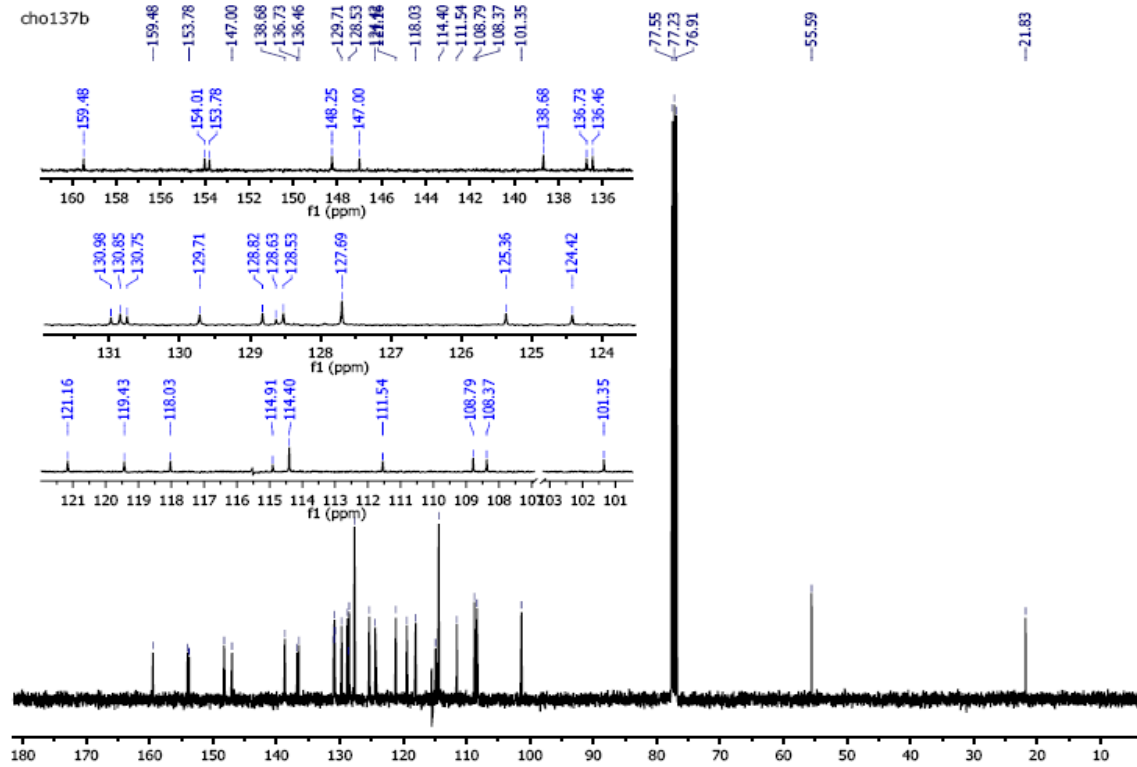

2,3,5-Trisubstituted benzo[b]furan 14{95}

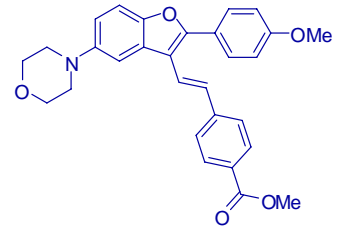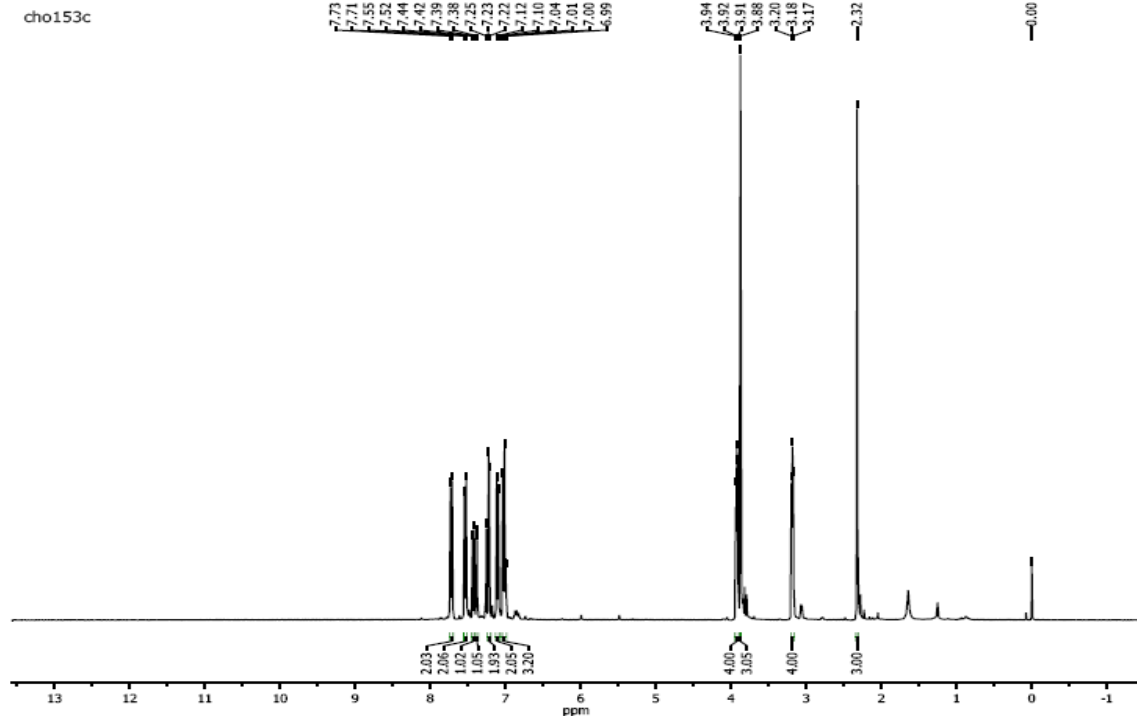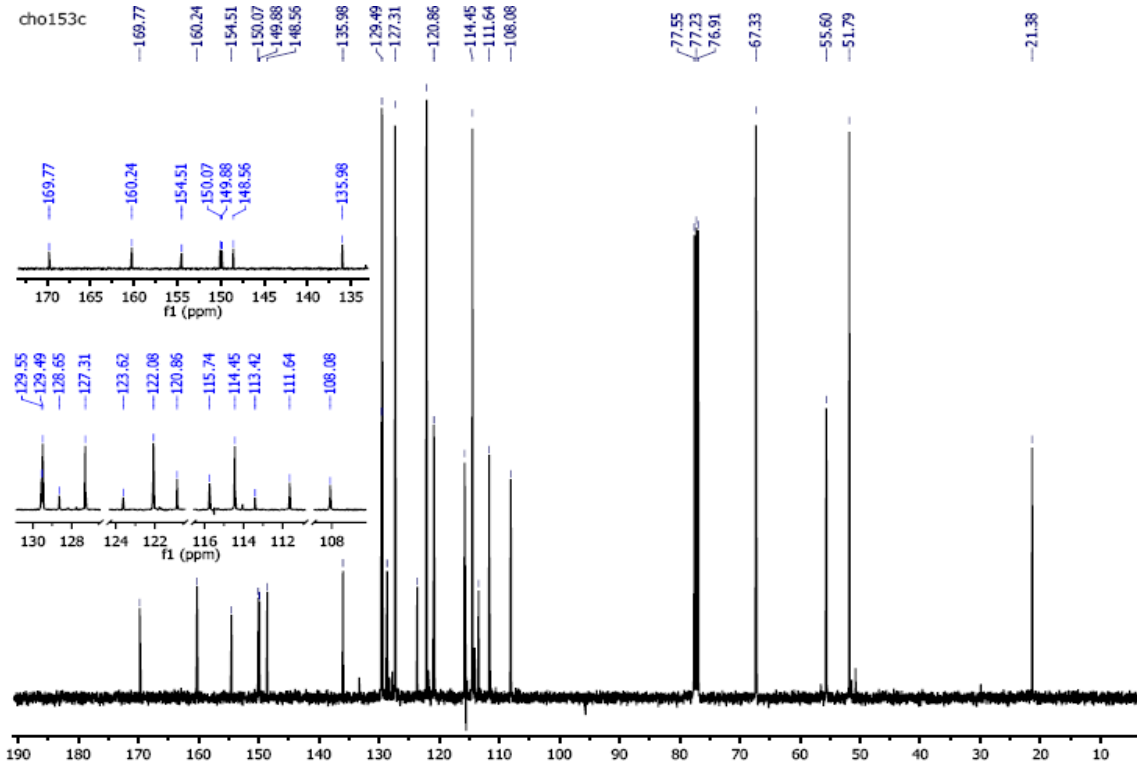



2,3,5-Trisubstituted benzo[*b*]furan 14{97}

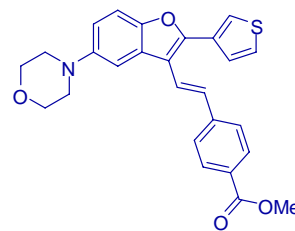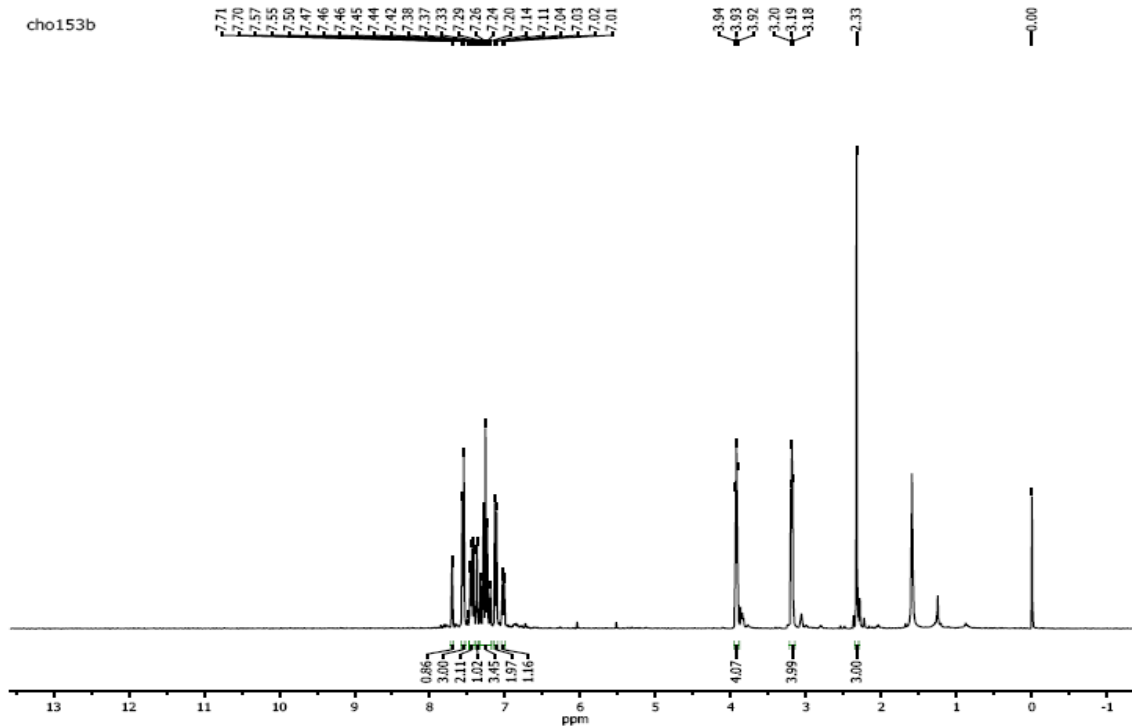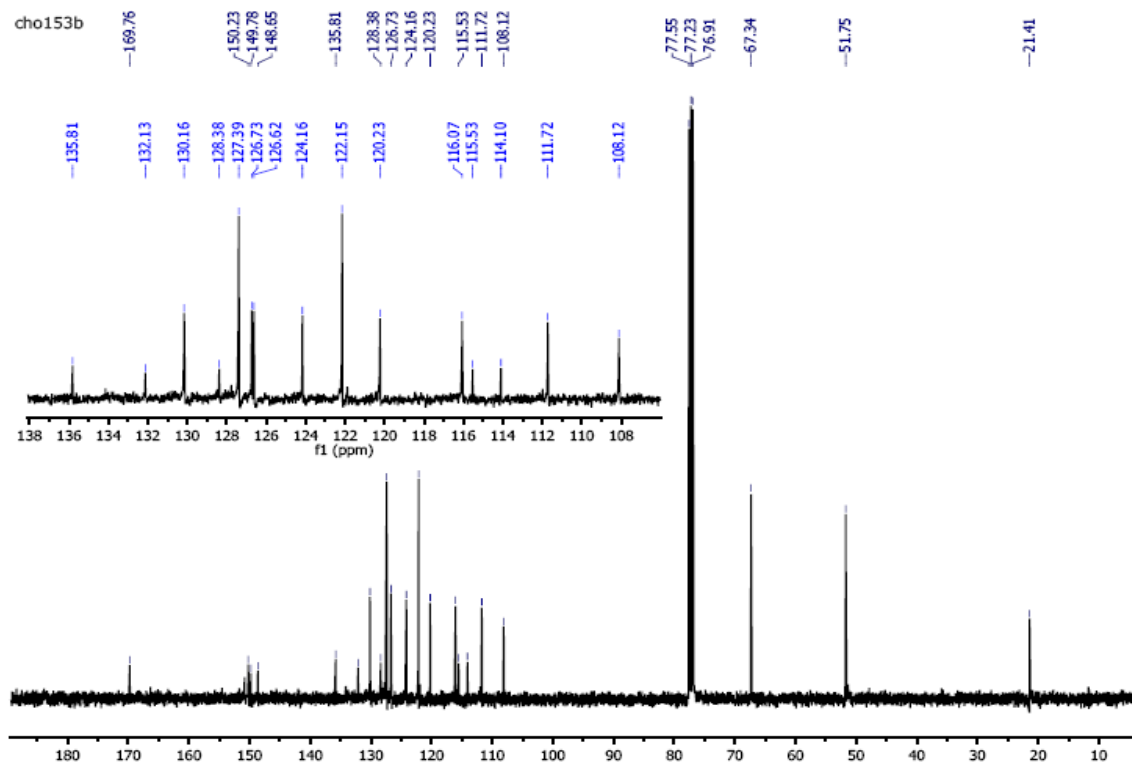

2,3,5-Trisubstituted benzo[b]furan 14{106}

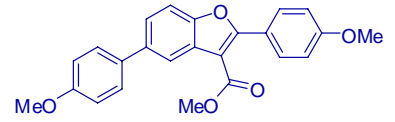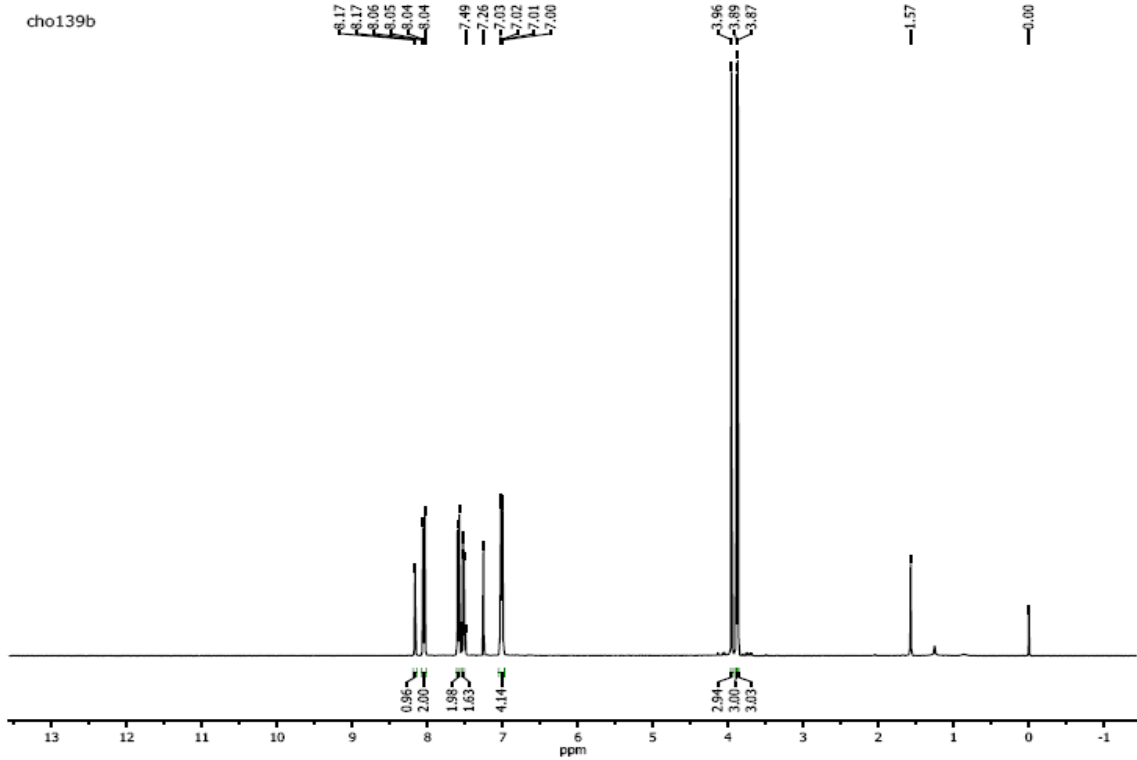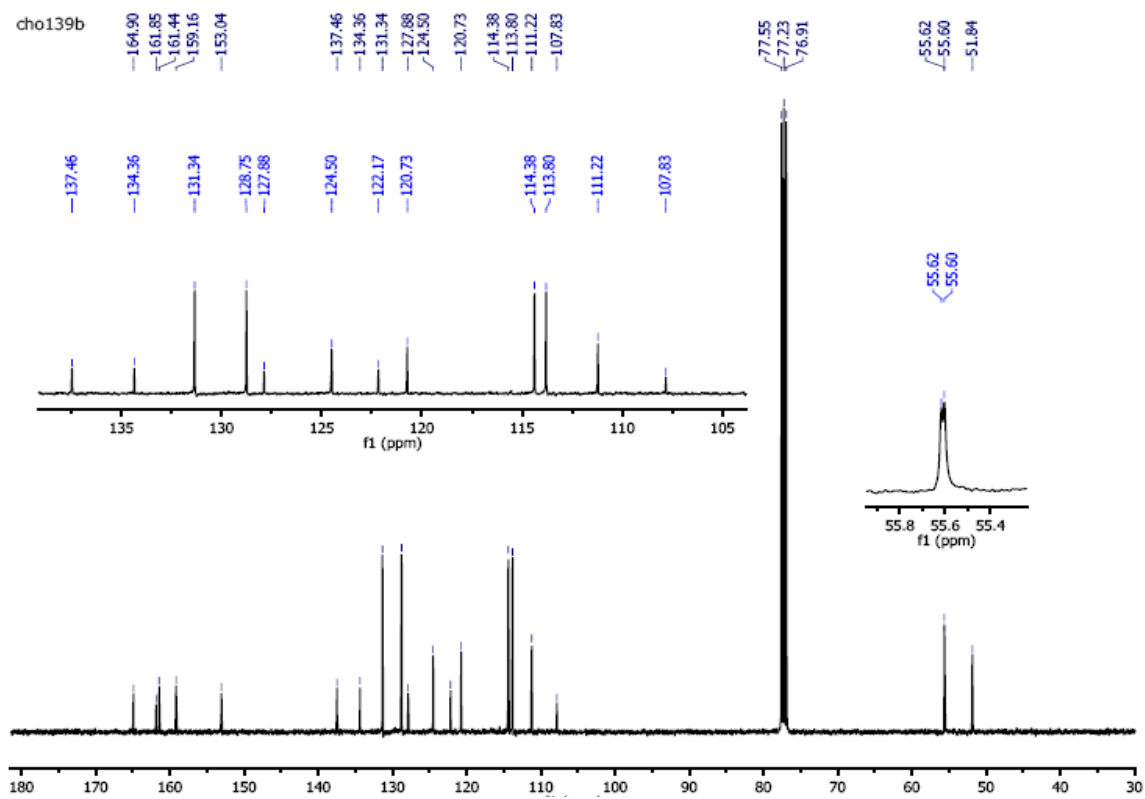

2,3,5-Trisubstituted benzo[*b*]furan 14{109}

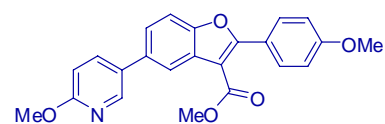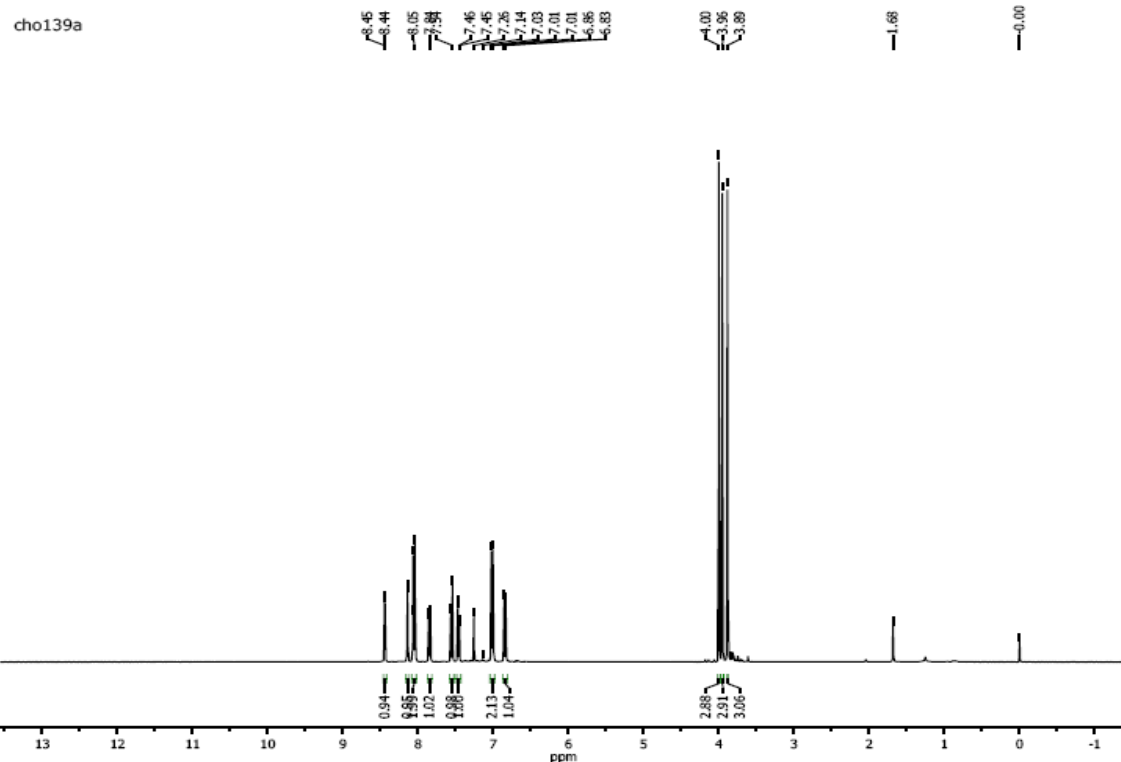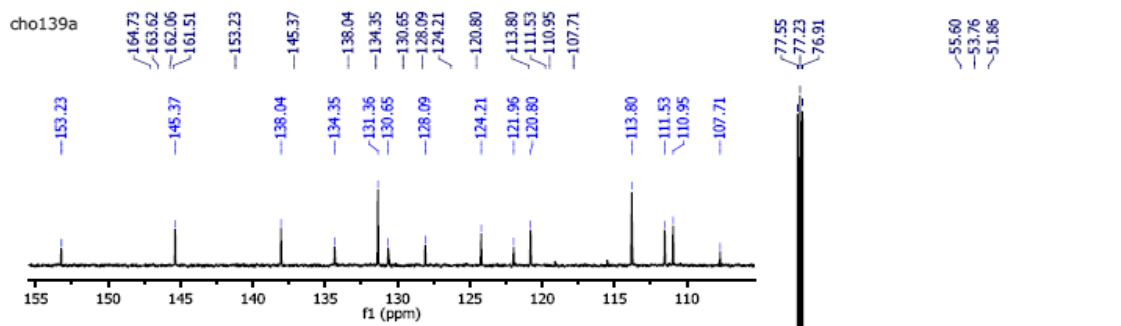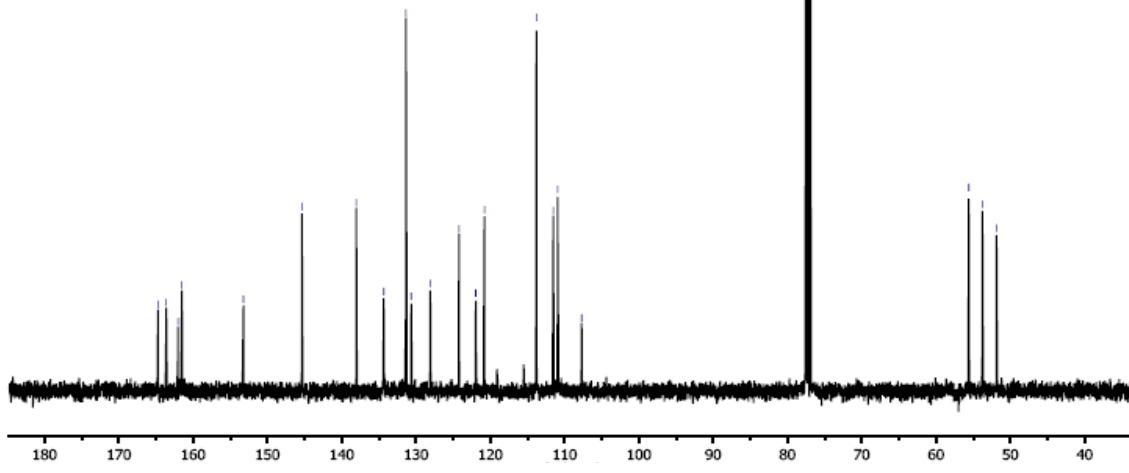

2,3,5-Trisubstituted benzo[b]furan 14{110}

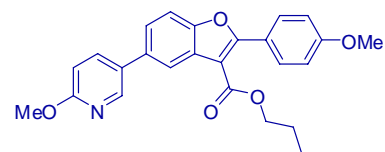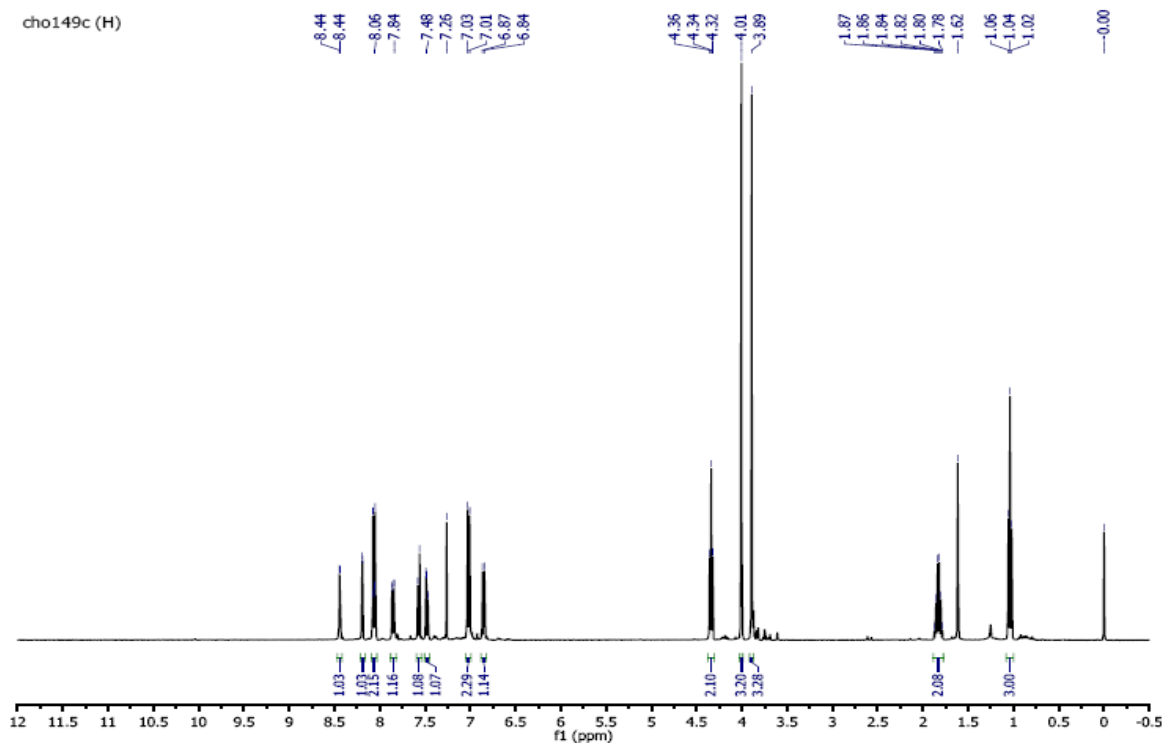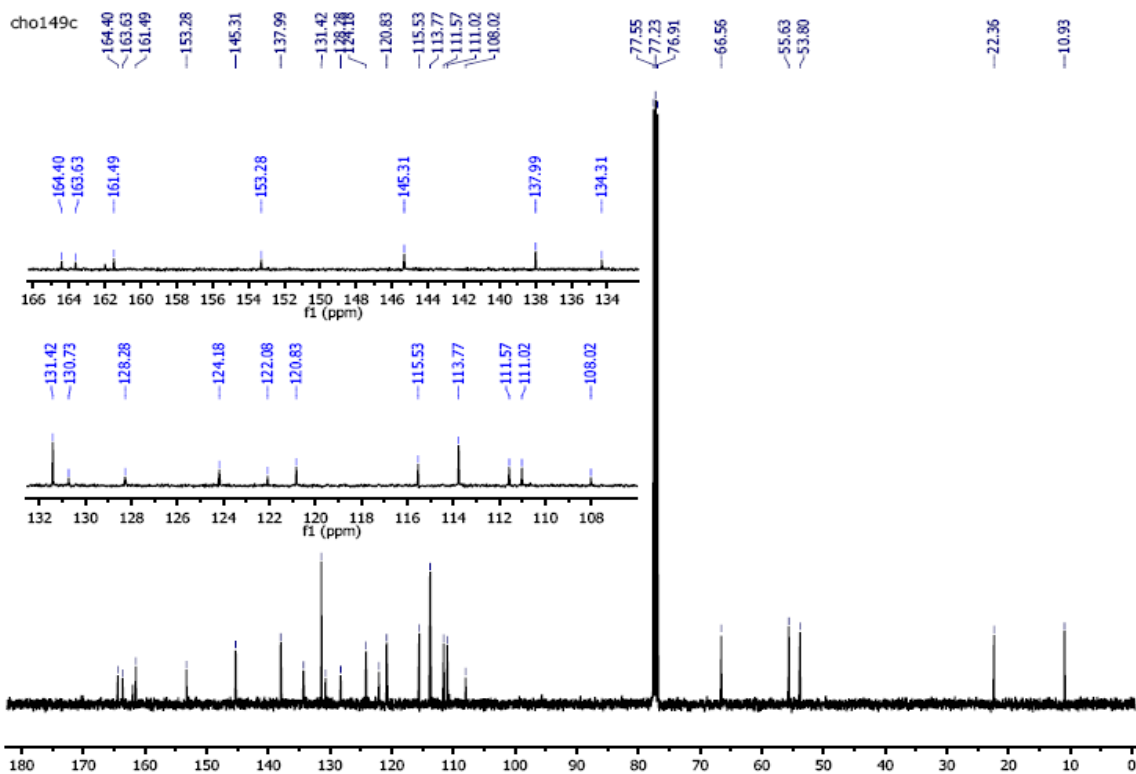

2,3,5-Trisubstituted benzo[*b*]furan 14{115}

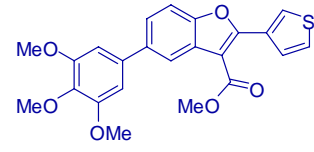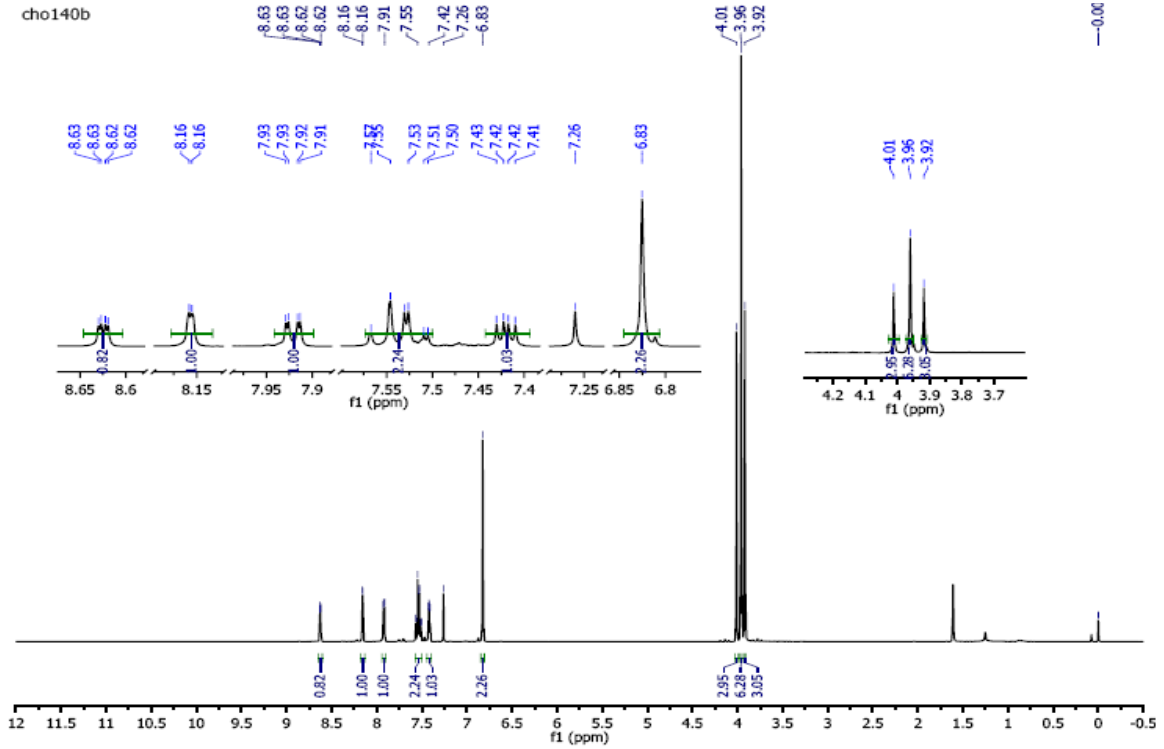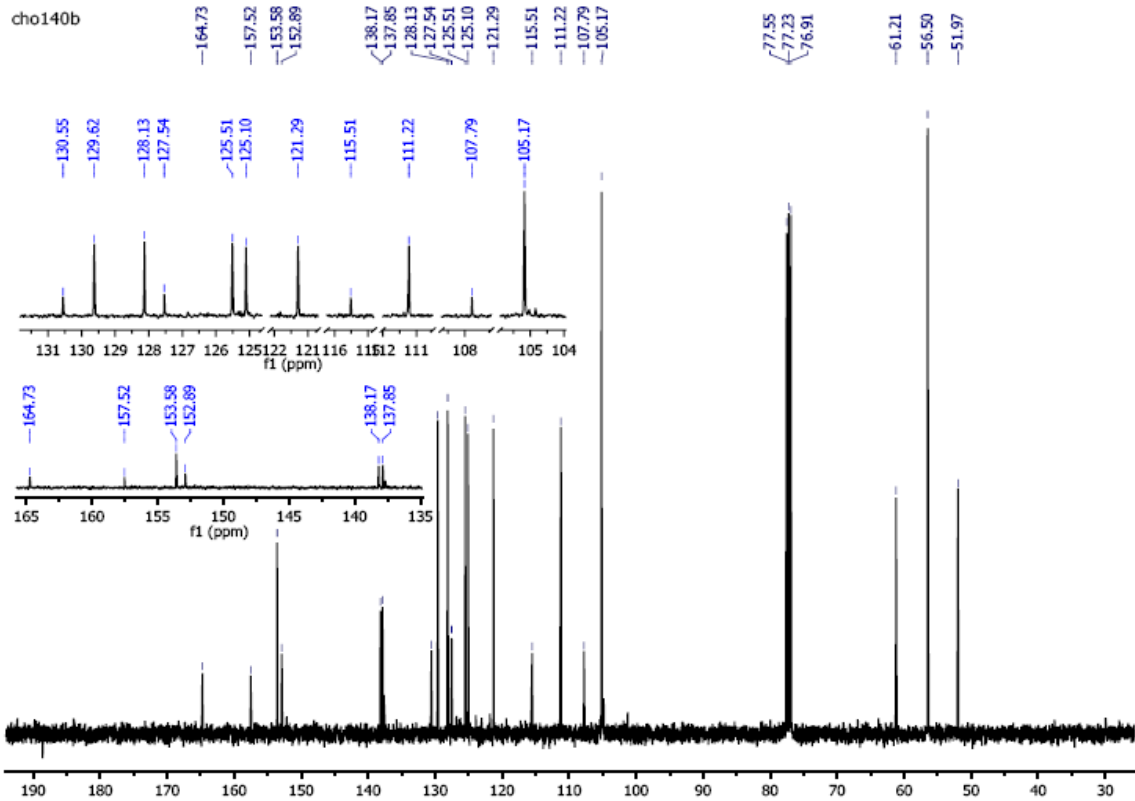

2,3,5-Trisubstituted benzo[b]furan 14{118}

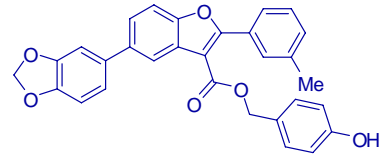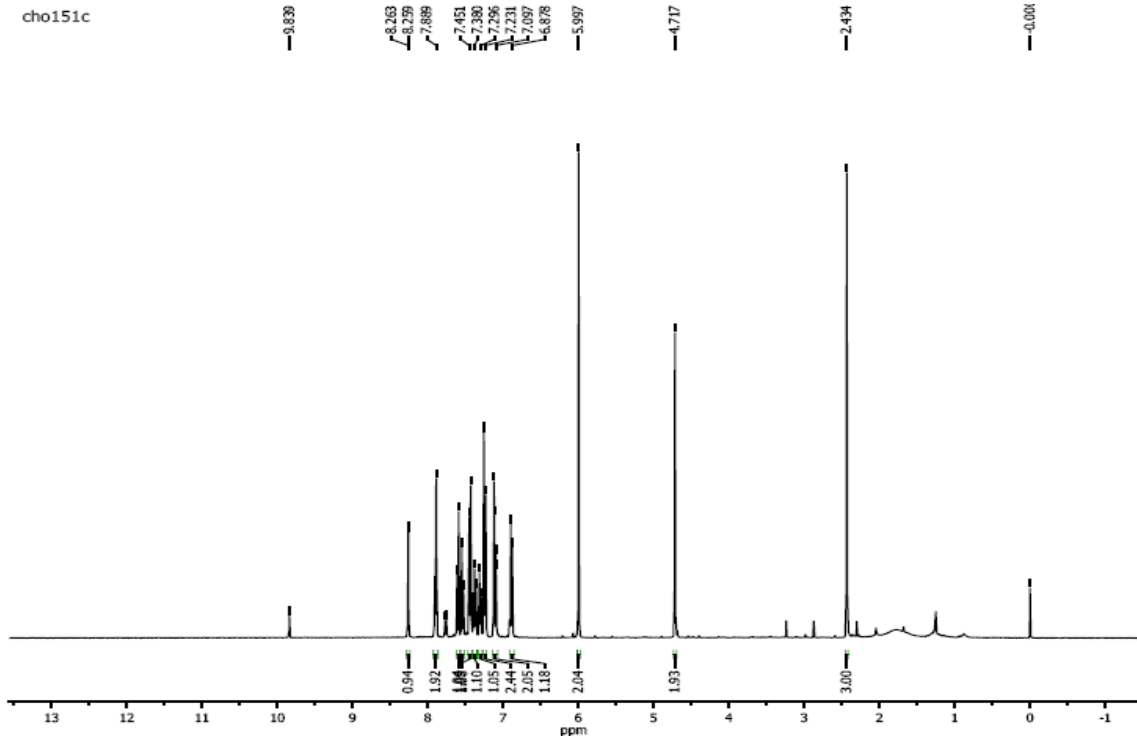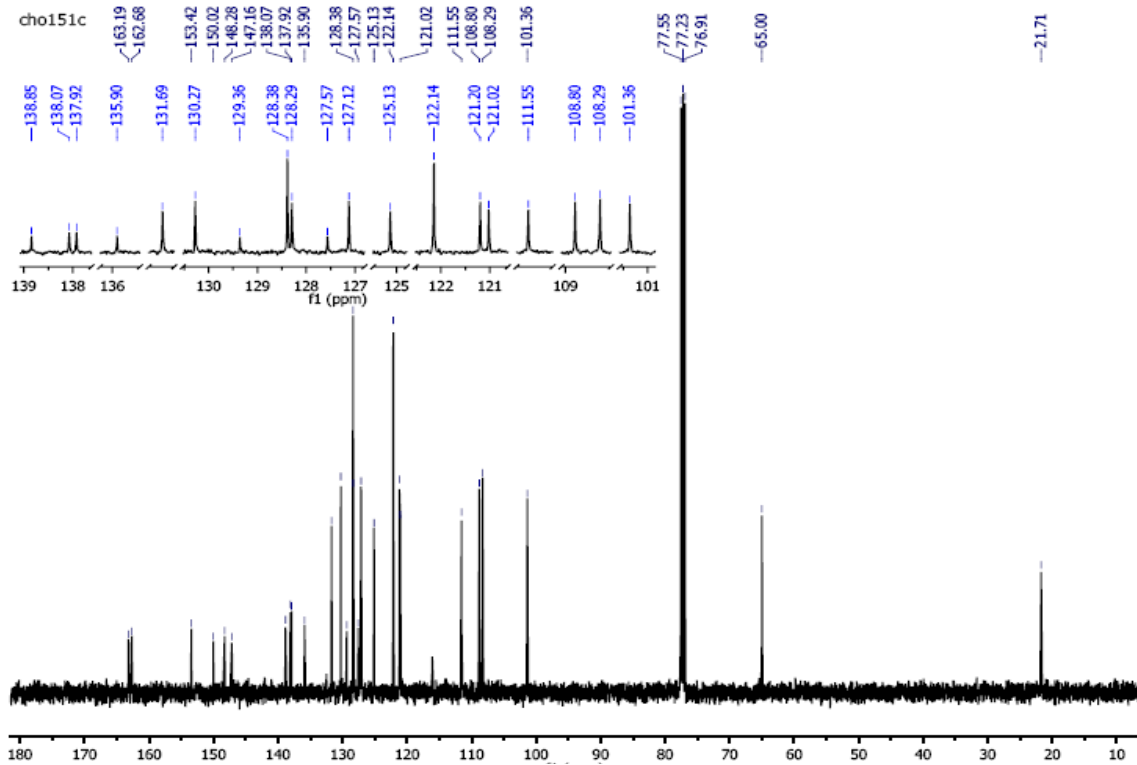

2,3,5-Trisubstituted benzo[b]furan 14{119}

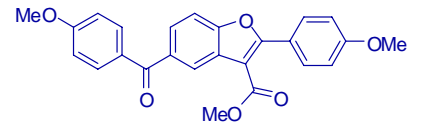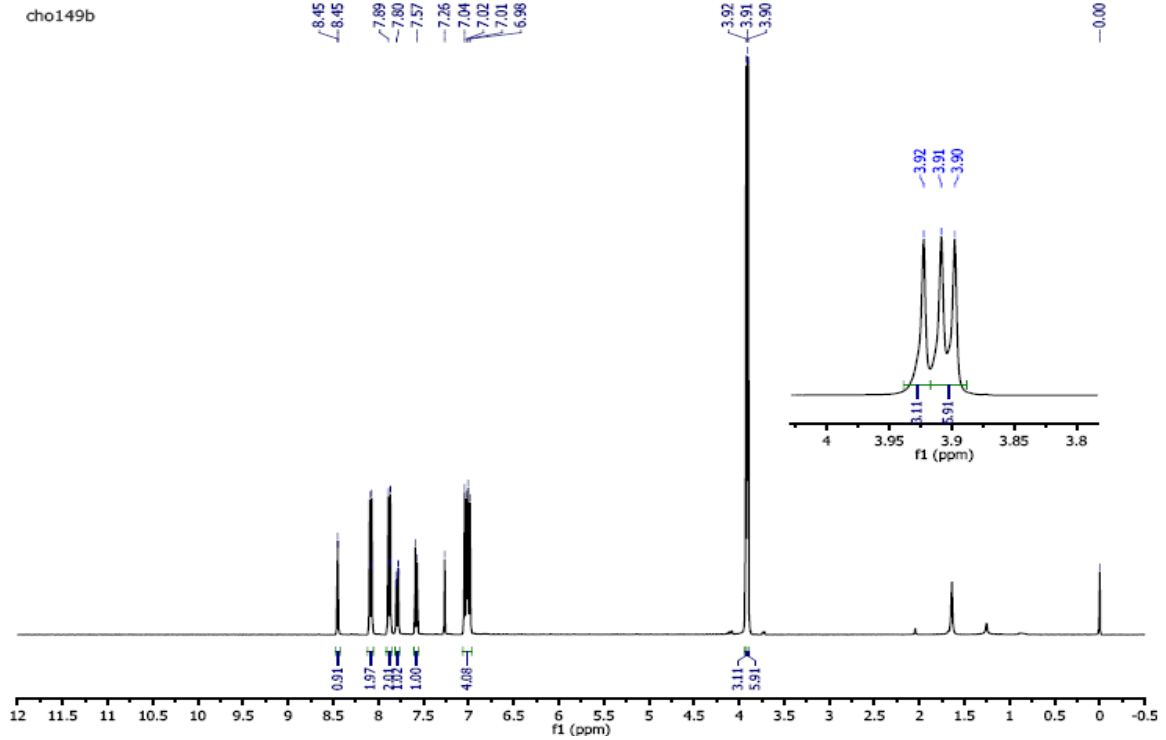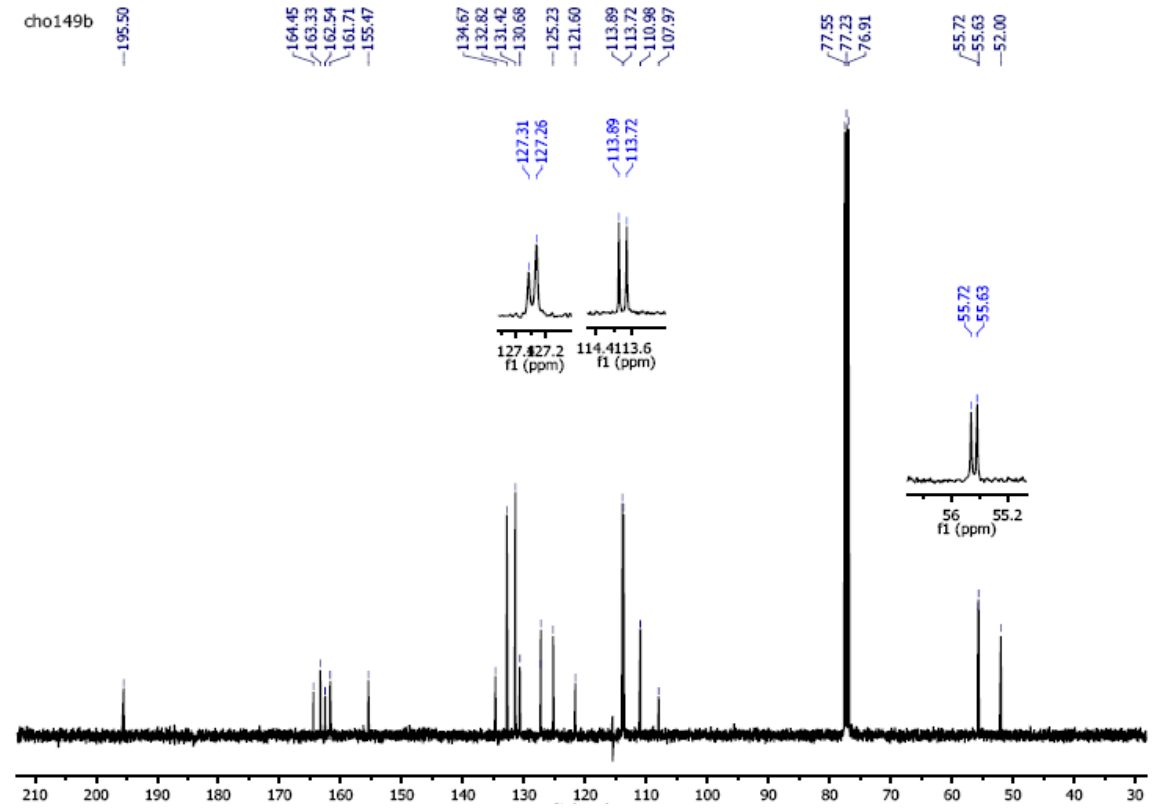

2,3,5-Trisubstituted benzo[b]furan 14{121}

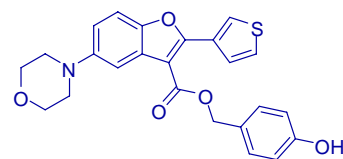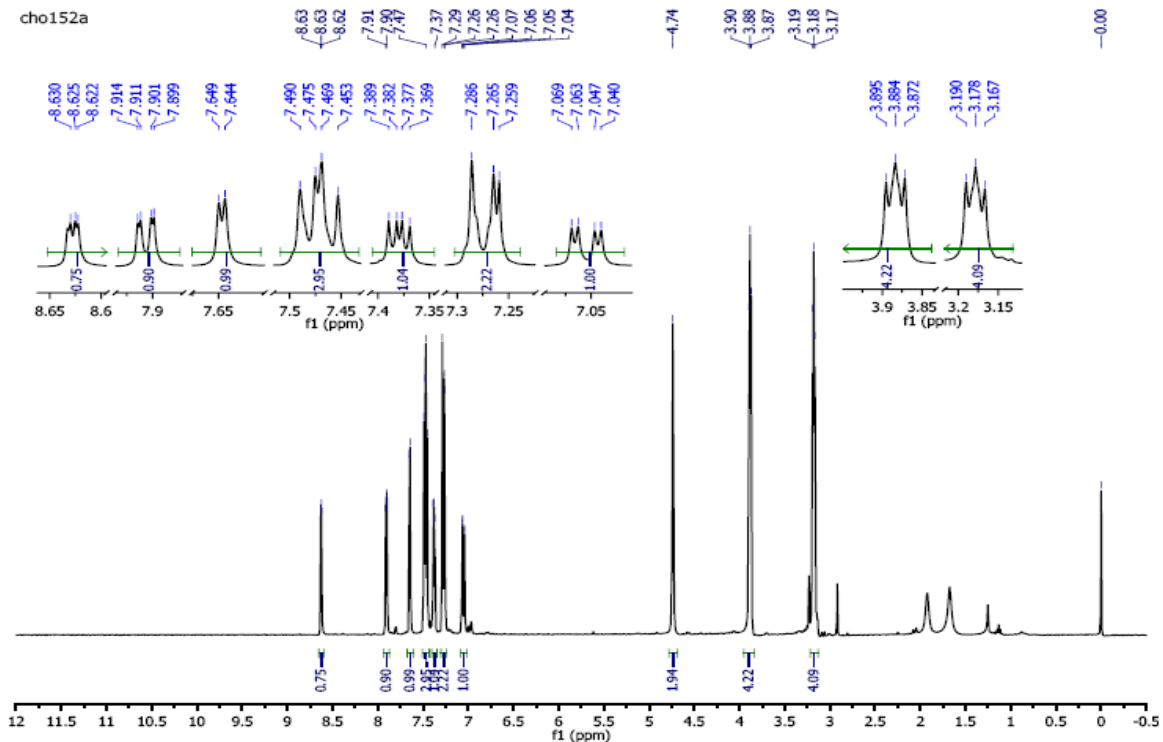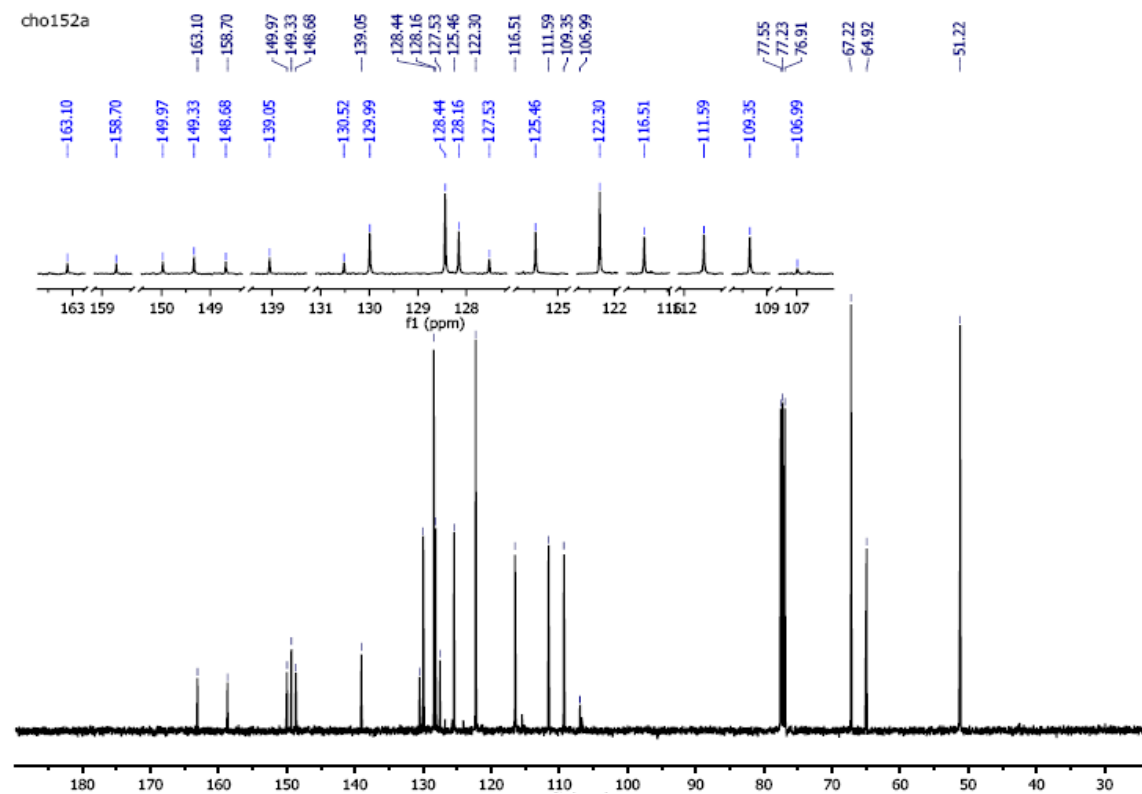

Supplement: NIHMS91014-supplement-1_si_001.pdf [file NIHMS91014-supplement-1_si_001.pdf]
